# 1 **The geometry of decision-making**

2 **Vivek Hari Sridhar<sup>a,b,c,1</sup>, Liang Li<sup>a,b,c,1</sup>, Dan Gorbonos<sup>a,b,c</sup>, Máté Nagy<sup>a,b,c,d,e,f</sup>, Bianca R.**  
3 **Schell<sup>g</sup>, Timothy Sorochnik<sup>h,i</sup>, Nir S. Gov<sup>i</sup> and Iain D. Couzin<sup>a,b,c,1</sup>**

4 <sup>a</sup>Department of Collective Behaviour, Max Planck Institute of Animal Behavior, Konstanz, 78464 Konstanz,  
5 Germany

6 <sup>b</sup>Centre for the Advanced Study of Collective Behaviour, University of Konstanz, 78464 Konstanz, Germany

7 <sup>c</sup>Department of Biology, University of Konstanz, 78464 Konstanz, Germany

8 <sup>d</sup>MTA-ELTE Statistical and Biological Physics Research Group, Hungarian Academy of Sciences, 1117,  
9 Budapest, Hungary

10 <sup>e</sup>MTA-ELTE ‘Lendület’ Collective Behaviour Research Group, Hungarian Academy of Sciences, 1117,  
11 Budapest, Hungary

12 <sup>f</sup>Department of Biological Physics, Eötvös Loránd University, 1117, Budapest, Hungary

13 <sup>g</sup>Department of Chemistry, University of Konstanz, 78464 Konstanz, Germany

14 <sup>h</sup>Department of Physics & Astronomy, University of Waterloo, Waterloo, ON N2L 3G1, Canada

15 <sup>i</sup>Department of Chemical and Biological Physics, Weizmann Institute of Science, Rehovot 76100, Israel

16

17 **Choosing among spatially-distributed options is a central challenge for animals, from**  
18 **deciding among alternative potential food sources or refuges, to choosing with whom to**  
19 **associate. Using an integrated theoretical and experimental approach (employing**  
20 **immersive virtual reality), we consider the interplay between movement and vectorial**  
21 **integration during decision-making regarding two, or more, options in space. In**  
22 **computational models of this process we reveal the occurrence of spontaneous and abrupt**  
23 **"critical" transitions (associated with specific geometrical relationships) whereby**  
24 **organisms spontaneously switch from averaging vectorial information among, to**  
25 **suddenly excluding one, among the remaining options. This bifurcation process repeats**  
26 **until only one option—the one ultimately selected—remains. Thus we predict that the**

27 **brain repeatedly breaks multi-choice decisions into a series of binary decisions in**  
28 **space-time. Experiments with fruit flies, desert locusts, and larval zebrafish reveal that**  
29 **they exhibit these same bifurcations, demonstrating that across taxa and ecological**  
30 **context, there exist fundamental geometric principles that are essential to explain how,**  
31 **and why, animals move the way they do.**

32

33 Animals constantly face the need to make decisions, and many such decisions require choosing  
34 among multiple spatially-distributed options. Despite this, most studies have focused on the  
35 outcome of decisions (1–3) (i.e. which option among alternatives is chosen), as well as the time  
36 taken to make decisions (4–6), but seldom on the movement of animals throughout the  
37 decision-making process. Motion is, however, crucial in terms of how space is represented by  
38 organisms during spatial decision-making; the brains of a wide range of species, from insects  
39 (7, 8) to vertebrates (9, 10), have been shown to represent egocentric spatial relationships, such  
40 as the position of desired targets, via explicit vectorial representation (11, 12). Such neuronal  
41 representations must, and do, change as animals move through space. Thus, while the  
42 movement of an animal may, initially, appear to simply be a readout of the decision made by  
43 the brain—and consequently not particularly informative—this view overlooks important  
44 dynamical properties introduced into the decision-making process that result from the  
45 inevitable time-varying geometrical relationships between an organism and spatially-  
46 distributed options (i.e. potential ‘targets’ in space).

47

48 Due to a dearth of existing studies, and with the objective to develop the necessary foundational  
49 understanding of the ‘geometry’ of decision-making, we focus here—first theoretically and  
50 then experimentally—on the consequences of the recursive interplay between movement and  
51 (collective) vectorial integration in the brain during relatively simple spatial decisions. We

52 employ immersive virtual reality to investigate decision-making regarding multiple (two or  
53 more) options in both invertebrate (the fruit fly *Drosophila melanogaster*, and desert locust  
54 *Schistocerca gregaria*) and vertebrate (larval zebrafish *Danio rerio*) models. Doing so allows  
55 us to reveal the emergence of geometric principles that transcend the study organism and the  
56 decision-making context, and thus are expected to be broadly relevant across taxa. In support  
57 of this finding we also explore how these principles extend to collective decision-making in  
58 mobile animal groups, allowing us to gain insights across three scales of biological  
59 organisation, from neural dynamics, to both individual and collective decision-making.

60

## 61 **Modelling decision-making on the move**

62 Congruent with neurobiological studies of the invertebrate and vertebrate brain, we consider  
63 organisms to have an egocentric vectorial representation of spatial options (11–13). We then  
64 consider the collective dynamics of vector integration in the brain assuming there exists  
65 reinforcement (excitation/positive feedback) among neural ensembles that have similar  
66 directional representations (goal vectors), and global inhibition and/or negative feedback (both  
67 produce broadly similar results, see SI Appendix and Fig. S1) among neural ensembles that  
68 differ in vectorial representation. This captures, in a simple mathematical formulation, the  
69 essence of both explicit ring-attractor networks (as found in insects (7)), and computation  
70 among competing neural groups (as in the mammalian brain (14)). The animal's relative  
71 preference for a target is given by activity of neurons that encode direction to that target relative  
72 to activity of neurons that encode direction to other targets, and the angular sensitivity of the  
73 neural representations (angular difference at which excitation no longer occurs) is specified by  
74 a neural tuning parameter,  $\nu$ . The network then computes a unique 'consensus' vector ('activity  
75 bump') that, along with some angular noise, represents the animal's desired direction of  
76 movement (Fig. S2). This is then translated into motor output (see SI Appendix for model

77 details \cite{pinkoviezky\_collective\_2018}). Stochasticity in neural dynamics is implemented  
78 here as the neural noise parameter,  $T$ .

79

80 While capturing known, generic features of neural integration, our model is deliberately  
81 minimal. This serves multiple purposes: firstly, following principles of maximum parsimony  
82 we seek to find a simple model that can both predict and explain, the observed phenomena;  
83 secondly, we aim to reveal general principles and thus consider features that are known to be  
84 valid across organisms irrespective of inevitable difference in structural organization of the  
85 brain; thirdly, it provides a convenient means to implement neural noise, and can be mapped  
86 to the class of neural ring-attractor models widely-used in neuroscience (15–18) (see SI  
87 Appendix for details). In addition, our results are shown to be extremely robust to model  
88 assumptions, suggesting that it provides an appropriate low-level description of essential  
89 system properties.

90

## 91 **Deciding between two options**

92 Beginning with the simplest case, we consider the feedback between motion and internal  
93 vectorial-computation when an animal is presented with two equally-attractive, but spatially-  
94 discrete, options. In this case the activity of neurons encoding option 1,  $N_1$  will be equal to  
95 those encoding option 2,  $N_2$  (Fig. 1A). Our model predicts that an animal moving, from a  
96 relatively distant location, towards the two targets, will spontaneously compute the average  
97 directional preference, resulting in corresponding motion in a direction oriented between the  
98 two targets. As it approaches the targets, however, upon reaching a certain angular difference  
99 between the options, the internal network undergoes a sudden transition in which it  
100 spontaneously selects one, or the other, target (Fig. 1C). This results in an abrupt change in

101 trajectory, the animal being redirected towards the respective ‘selected’ target (Fig. 1C; see  
102 also Fig. S3A for the same phenomenon occurring for a wide range of starting positions).

103

104 Our model therefore predicts that despite the fact that the egocentric geometrical relationship  
105 between the animal and the targets changes continuously, upon approaching the targets, there  
106 exists a location whereby a further, very small, increase in angular difference between the  
107 targets will result in a sudden change in system (neural) dynamics, and consequently in motion,  
108 and thus decision-making. Such spatio-temporal dynamics do not occur if individuals were to  
109 simply integrate noisy vectorial information or choose their travel direction from a summed  
110 distribution of the location of targets in their sensory field (19), points we will return to later.

111

112 In numerical analysis of our model we find that irrespective of starting position, as the animal  
113 reaches the respective angle in space, it will relatively suddenly select one of the options (Fig.  
114 S3A). While the specific angular difference at which this phenomenon occurs is dependent on  
115 neural tuning,  $\nu$  (Fig. S3C), and the starting configuration (due to an interplay between the two  
116 timescales involved—for movement and for neural consensus, see Fig. S3B), it is always  
117 present as long as the neural noise,  $T$  remains below a critical firing rate,  $T_c$  (although even for  
118  $T < T_c$ , these bifurcations may be difficult to see for small values of  $\nu$  due to inherent noise in  
119 real biological systems; see Fig. S4 for simulations where vectorial representations of targets  
120 include directional error).

121

122 To gain a deeper insight into the mechanism underlying the observed spatiotemporal dynamics,  
123 we constructed a mean-field approximation of our model (see SI Appendix) since this has the  
124 advantage of allowing us to conduct formal analyses of patterns realized in the simulated  
125 trajectories.

126

## 127 **Geometric principles of decision-making**

128 The mean-field analysis of our model shows that below a critical level of neural noise, animals  
129 will adopt the average among options as they approach the targets, until a critical phase  
130 transition upon which the system spontaneously switches to deciding among the options (Figs.  
131 1B and S5A). Thus despite varying in its exact location (Fig. 1B), the sudden transition  
132 observed is an inevitable consequence of the system dynamics and will always occur.

133

134 Such sudden transitions correspond to ‘bifurcations’ in the mathematical study of dynamical  
135 systems. A bifurcation is said to occur when a smooth change in an external parameter, in this  
136 case perceived angular difference between the options, causes a sudden qualitative change in  
137 the system’s behavior, here corresponding to a literal bifurcation (or branching) in physical  
138 space.

139

140 When dynamical systems undergo such a phase, or quasi-phase, transition they exhibit a  
141 remarkable universal property: close to the transition, at the “critical-point” or “tipping-point”,  
142 the system spontaneously becomes extremely sensitive to very small perturbations (e.g. to  
143 small differences in preference between options (20, 21)). This is true of both physical (e.g.  
144 magnetic (22)) and biotic (e.g. cellular (23, 24)) systems undergoing a phase transition.  
145 Correspondingly, we find that below a critical level of neural noise, the mean-field model  
146 exhibits a sudden increase in susceptibility as the animal approaches the critical point,  
147 immediately prior to the decision being made (Fig. S5A). This will not occur in previously-  
148 considered models where an animal is assumed to choose its direction of travel based on the  
149 summed distribution of targets in its sensory field, also known as probability density function,  
150 or PDF, sum-based models (19). Thus, as animals approach targets we predict they will pass

151 through a window of space (corresponding to the critical angle for the respective geometry they  
152 are experiencing) in which their brain spontaneously becomes capable of discriminating  
153 between very small differences between options (e.g. a very small difference in neuronal  
154 activity being in ‘favor’ of one option; see Fig. S3D and SI Appendix for details). This highly-  
155 valuable property (for decision-making) is not built into the model, but is rather an emergent  
156 property of the inherent collective dynamics.

157

158 In many real biological systems, including the ones we consider here, the (neural) system size  
159 is typically not large enough to consider true phase transitions (which only occur for very large  
160 systems, as per the mean-field approximation), but rather ‘phase-transition-like’, or ‘quasi-  
161 phase transition’, behavior. Even though real biological systems are not necessarily close to the  
162 infinite size limit of the mean-field approximation, we see very similar dynamics for both small  
163 and large system sizes (Fig. S6).

164

## 165 **Decision-making beyond two options**

166 While the majority of decision-making studies consider only two options (due to both  
167 theoretical and experimental tractability (14, 25, 26)), animals moving in real space frequently  
168 encounter a greater number than this. Here we consider how animals will be expected to select  
169 among three, or more, options (possible targets) in space. First we begin with three identical  
170 options ( $N_1 = N_2 = N_3$ ) since this gives us the clearest insight into the relationship between  
171 motion and decision-making dynamics. Then we relax these assumptions and consider  
172 differences between options (Fig. S3E) as well as a greater number of options (Fig. 2). Note  
173 that we do not modify our model in any way prior to introducing these additional complexities.

174

175 Below  $T_c$  (see SI Appendix and Fig. S7 for considerations when  $T > T_c$ ), we once again find  
176 that the direction in which the animal moves is a function of the angular difference between  
177 the targets. When relatively far from the targets, it moves in the average of these three  
178 directions. Upon reaching a critical angular threshold between the leftmost and rightmost  
179 option (from the animal's perspective), however, the neural system spontaneously eliminates  
180 one of them and the animal begins moving in the direction average between the two remaining  
181 options (Fig. 1D,E). It continues in this direction until a second critical angle is reached, and  
182 now the animal eliminates one of the two remaining options and moves towards the only  
183 remaining target (Figs. 1F and S5B). Thus we predict that the brain repeatedly breaks multi-  
184 choice decisions into a series of binary decisions in space-time. Such bifurcation dynamics are  
185 not captured in models of decision-making that do not include the required feedbacks, such as  
186 if individuals simply sum noisy vectors (or PDFs) to targets in their sensory field (19). For the  
187 case of three targets, vectors/votes to the leftmost option would tend to cancel those that favor  
188 the rightmost option, resulting in the selection of the central option, an issue we will return to  
189 later when considering collective animal behavior. Simulating a larger number of options (Fig.  
190 2) and varying environmental geometries (Figs. S8 and S9) demonstrate the robustness of this  
191 mechanism in the face of environmental complexity and the more complex spatial dynamics  
192 that emerge as organisms undergo repeated bifurcations.

193

## 194 **Experimental tests of our predictions**

195 Since the decision-process is predicted to be sequential, and dependent on the geometry with  
196 respect to the targets from an egocentric perspective, it should be possible to visualize it directly  
197 from the trajectories taken by animals when making spatial decisions. In this respect, our  
198 theoretical studies make a key testable prediction: if neural groups within the decision-making  
199 ensemble exhibit relatively local excitation, and long-range/global inhibition, we should



200 observe bifurcations in the animals' trajectories as they choose among identical options; and  
201 that if animals face three (or more) such options, then the complex decision task should be  
202 broken down to a series of binary decisions.

203

204 Since the geometrical principles revealed above are expected to be both robust and generic, we  
205 use immersive virtual reality (27) (Fig. S10) to test our predictions by investigating both two-  
206 and three-choice decision-making in three evolutionarily highly-divergent brains under  
207 ecologically-relevant scenarios: fruit flies (*Drosophila melanogaster*) and desert locusts  
208 (*Schistocerca gregaria*) deciding which among multiple vertical objects to approach (e.g. to  
209 perch), and zebrafish (*Danio rerio*) choosing with which conspecific(s) to school.

210

211 Like many other insects (28–31), fruit flies (32) and desert locusts (33) exhibit a natural  
212 tendency to orient and move towards high-contrast vertical features (potential landing sites or  
213 indicators of vegetation) in their environment. We exploit this tendency, presenting multiple  
214 identical black pillars as targets in an otherwise white environment. We record trajectories of  
215 our focal animals (solitary flies or locusts) as they choose to move towards one of these pillars,  
216 thus obtaining a behavioral readout of the decision-making process (see SI Appendix for  
217 experimental details; Figs. S11 and S12 show raw trajectories of flies and locusts respectively).

218

219 As predicted by our theory (Fig. 1B,C), we find that, in the two-choice case, most flies and  
220 locusts that choose one of the presented targets initially move in the average of the egocentric  
221 target directions until a critical angular difference (Fig. S13), at which point they select  
222 (randomly) one, or the other, option and move towards it (randomization test where  
223  $y$ -coordinates between trajectories were swapped showed that the bifurcation fit to our  
224 experimental data was highly significant;  $p < 0.01$  for both flies and locusts; Figs. 1G and

225 S13). Here, we note that there may be multiple factors that affect the animals' direction of  
226 movement. For example, it could be that animals repeatedly switch between fixating on each  
227 of the two options before reaching the critical angular difference, following which it selects  
228 one. However, quantification of their heading relative to the targets, and to the average  
229 direction between the targets (Fig. S13), finds no evidence for this; instead, prior to the  
230 bifurcation, both flies and locusts exhibit a heading towards the average of the egocentric target  
231 directions. In the three-choice case, the animals' movements are also consistent with our  
232 theory; as predicted (Fig. 1E,F) they break the three-choice decision into two sequential binary  
233 decisions ( $p < 10^{-4}$  for both flies and locusts; Fig. 1H). For both animals, the observed angle  
234 of bifurcation ( $\sim 110^\circ$  for flies and  $\sim 90^\circ$  for locusts) is much larger than their visual spatial  
235 resolution ( $\sim 8^\circ$  and  $\sim 2^\circ$  for flies (34) and locusts (35, 36), respectively). We note  $\sim 30\%$  of  
236 animals in our experiments (both flies and locusts) did not exhibit the sequential bifurcations  
237 (see Figs. S11 and S12) described above, and instead moved directly towards one of the  
238 presented targets (Figs. S11 and S12). Such variability in response is expected in animals, and  
239 is consistent with recent work on the visual response of flies, which demonstrates a link  
240 between stochastic (non-heritable) variation in brain wiring within the visual system and  
241 strength of visual orientation response to a vertical stripe target (37). Furthermore, flies that  
242 experience high temperatures during development appear to exhibit a particularly strong  
243 orientation tendency, exhibiting the most direct paths to targets while flies that experience low  
244 developmental temperatures exhibit wandering paths to targets (38). In our model such  
245 differences can be accounted for by variation in directional tuning of the neural groups, with  
246 high directional tuning (low  $\nu$ ) being associated with a strong orientational response, and such  
247 individuals exhibiting direct tracks to targets from the outset (see Fig. S14).

248

249 A further, non-mutually exclusive, possibility, is that a subset of insects exhibit "handedness".  
250 For example, in (39), it was shown that approximately 25% of *Drosophila* were either strongly  
251 left-biased or right-biased when moving on a Y-maze, and that these consistent differences  
252 among flies were similarly non-heritable. This experimental design did not assess whether a  
253 further subset are biased to go directly forwards if offered three directional choices (such as  
254 could occur in a hypothetical  $\Psi$  maze). In such cases, it is certainly possible that these intrinsic  
255 directional biases break symmetry (Fig. S3D,E), resulting in directed paths to different targets.  
256  
257 We note that individuals predisposed to exhibit direct paths to targets would be expected to  
258 make faster, yet less accurate, decisions, a prediction we plan to test in future studies.  
259  
260 Our zebrafish experiments consider spatial decision-making in a social context. We present  
261 virtual conspecifics (see SI Appendix for methodological details) that move back-and-forth in  
262 the arena parallel to each other as targets (Figs. 3A and S15A) and behave (Fig. S16), and are  
263 responded to (Fig. S17), in the same way as real fish. Because they are social, the real fish  
264 respond to these virtual fish by tending to follow at a (relatively) fixed distance behind them  
265 (Fig. S15E). Our data are best represented within this moving frame of reference (the virtual  
266 fish; Fig. S15). Theoretically we predict that for two virtual fish we should see a single  
267 bifurcation, where the real fish will suddenly switch from averaging the target directions to  
268 deciding among them (i.e. swimming predominantly with one of the virtual fish), as a function  
269 of increasing the lateral distance,  $L$ , between the virtual fish (Figs. 3B and S18; see SI Appendix  
270 for details of model implementation). The existence of this bifurcation is clearly seen in our  
271 experiments (Fig. 3C). When considering three moving virtual conspecifics, the model predicts  
272 that real fish will spontaneously break the three-choice decision to two binary decisions, and a

273 comparison of the theoretical prediction and experimental results demonstrates this to be the  
274 case (c.f. Fig. 3E,F).

275

276 We also test predictions under conditions where there is an asymmetric geometry whereby two  
277 fish swim closer to each other than the central one does to the third fish (Fig. 4A). As predicted  
278 by our theory (Fig. 4B), the real fish tends to swim between the two closely-associated fish, or  
279 close to the third, more distant, fish (Fig. 4B). Note that, also as predicted, the real fish spends  
280 a similar amount of time in each of the two locations.

281

282 Although detailed models considering the specifics of each system would be expected to  
283 provide additional quantitative fits (at the expense of losing some degree of generality and  
284 analytical tractability), our results are broadly independent of the model implementation  
285 details. Thus, we find that the key predictions of our model are validated in fruit flies, desert  
286 locusts and larval zebrafish in distinct, yet ecologically relevant contexts.

287

## 288 **Model features that determine network behavior**

289 There are key features that are essential to produce the bifurcation patterns observed in our data  
290 i.e. for any decision-making system to break multi-choice decisions to a series of binary  
291 decisions.

- 292 • Feedback processes that provide the system directional persistence, and drive such  
293 bifurcations, are crucial to exhibit the observed spatio-temporal dynamics. In the neural  
294 system, this is present in the form of local excitation and long-range/global inhibition  
295 (7, 16, 17). However, as shown in our model of collective animal behavior below, we  
296 expect that similar dynamics will be observed if the necessary feedbacks are also

297 incorporated into other models of decision-making, such as to PDF-sum-based models,  
298 for example (19).

299 • Observing similar decision dynamics requires a recursive (embodied) interplay  
300 between neural dynamics, and motion in continuous space. Here, the animal's  
301 geometrical relationship with the targets changes as it moves through physical space.  
302 Since neural interactions depend on this changing relationship, space provides a  
303 continuous variable by which the individual traverses the time-varying landscape of  
304 neural firing rates.

305 These essential features, along with the observed animal trajectories in the two-choice context,  
306 are reminiscent of collective decision-making in animal groups (models (40–44), fish schools  
307 (45), bird flocks (46) and baboon troops (25)). Below, we consider an established model of  
308 collective decision-making (40) to draw links between these two scales of biological  
309 organization—decision-making in the brain, and decision-making in animal groups.

310

### 311 **A link to collective decision-making**

312 In order to draw a link between individual decision-making and collective decision-making in  
313 animal groups, we consider an animal group with equal number of individuals exhibiting  
314 preference for each target (see SI Appendix for methodological details). A long-standing  
315 approach in the study of animal collectives is to consider them integrating vectorial information  
316 from neighbors (47, 48), and there are a great number of publications of such “flocking”,  
317 “schooling” or “herding” behaviors (47–49). Individuals within groups may also have  
318 preferences to reconcile this local vector-averaging with goal-oriented behavior, such as a  
319 desired direction of travel (40, 45), and such models have made effective predictions regarding  
320 how the number of individuals with a common desired direction of travel influences the  
321 accuracy of group motion towards targets (25) and how the weighting of the internal ‘goal-

322 oriented' vector representing the desired direction of travel, influences the capacity and  
323 accuracy for individuals to act as leaders and to influence the direction taken by the group as a  
324 whole (50).

325

326 We demonstrate here, however, that while ubiquitous, such models of collective animal  
327 behavior fail to account for the known capability for animal groups to make decisions among  
328 spatially discrete targets (see Fig. S19A,B). To do so, it is essential that the necessary  
329 feedbacks, as described above for collective decision-making among neurons, are incorporated.  
330 While these feedbacks are inherent to our neural model, they can also be included in other  
331 models in the form of social interactions, or in the animals' response to their environment (51).

332

333 For example, one way feedback can be introduced here is via 'informed' individuals (those  
334 with a desired direction of travel) associating with 'uninformed' or 'unbiased' individuals  
335 (individuals that exhibit social interactions but have no specific desired direction of travel) (40,  
336 45); 'uninformed' individuals are effectively recruitable by those with a desired direction of  
337 travel (providing local positive feedback), but are also in finite supply, creating what is  
338 effectively a competition among informed subsets that differ in their preferred direction of  
339 travel (a form of longer-range inhibition between informed subsets). However, because  
340 'uninformed' individuals tend to average the direction of all 'informed' individuals that recruit  
341 them, we find that this type of feedback functions more as a social glue, and is only able to  
342 explain bifurcations when the group is choosing between two options. In a decision-making  
343 context with three options, this type of feedback, alone, results in the group almost always  
344 moving towards the central target (Fig. S19D).

345

346 A means of resolving this issue is for individuals to change the strength of their goal-  
347 orientedness as a function of their experienced travel direction; for example, individuals that  
348 find themselves consistently moving in a (group) direction that differs from their preferred  
349 target direction could weaken the strength of their preference over time (a form of  
350 forgetting/negative feedback, effectively resulting in long-range/global inhibition; and once  
351 this preference is lost, they will tend to spontaneously reinforce the majority-selected direction  
352 (45), a form of positive feedback). We find that this biologically-plausible mechanism (40) will  
353 allow individuals within the group to recover the capability to come to consensus even in the  
354 absence of uninformed individuals (Fig. 5), and for a greater number of options than two (Fig.  
355 5B).

356

357 Despite considerable differences in details between this model and that of neural dynamics  
358 described above, with the former involving individual components that change neighbor-  
359 relationships over time and where inhibition emerges from a different biological process, the  
360 predictions regarding motion during decision-making are extremely similar (c.f. Fig. 5 and Fig.  
361 1 for a comparison between predictions for animal groups and neural groups, respectively).  
362 Thus, we find that similar principles may underlie spatial decision-making across multiple  
363 scales of biological organization. Furthermore by presenting social interactions in a decision-  
364 making context, our zebrafish experiments elucidate the neural basis of schooling allowing us  
365 to glean insights across three scales of biological organization—from neural dynamics to  
366 individual decisions, and from individual decisions to collective movement.

367

## 368 **Conclusions**

369 We demonstrate that, across taxa and contexts, explicitly considering the time-varying  
370 geometry during spatial decision-making provides new insights that are essential to understand

371 how, and why, animals move the way they do. The features revealed here are highly robust,  
372 and we predict that they occur in decision-making processes across various scales of biological  
373 organization, from individuals to animal collectives (see Figs. 5 and S19, and SI Appendix),  
374 suggesting they are fundamental features of spatiotemporal computation.

375

## 376 **References**

- 377 1. C. E. J. Kennedy, J. A. Endler, S. L. Poynton, H. McMinn, Parasite load predicts mate  
378 choice in guppies. *Behav Ecol Sociobiol* **21**, 291–295 (1987).
- 379 2. K. Summers, R. Symula, M. Clough, T. Cronin, Visual mate choice in poison frogs.  
380 *Proceedings of the Royal Society of London. Series B: Biological Sciences* **266**, 2141–  
381 2145 (1999).
- 382 3. E. Forsgren, Predation Risk Affects Mate Choice in a Gobiid Fish. *The American Naturalist*  
383 **140**, 1041–1049 (1992).
- 384 4. R. Kiani, L. Corthell, M. N. Shadlen, Choice Certainty Is Informed by Both Evidence and  
385 Decision Time. *Neuron* **84**, 1329–1342 (2014).
- 386 5. J. M. Beck, *et al.*, Probabilistic Population Codes for Bayesian Decision Making. *Neuron*  
387 **60**, 1142–1152 (2008).
- 388 6. A. K. Churchland, R. Kiani, M. N. Shadlen, Decision-making with multiple alternatives.  
389 *Nature Neuroscience* **11**, 693–702 (2008).
- 390 7. S. S. Kim, H. Rouault, S. Druckmann, V. Jayaraman, Ring attractor dynamics in the  
391 *Drosophila* central brain. *Science* **356**, 849–853 (2017).
- 392 8. J. D. Seelig, V. Jayaraman, Neural dynamics for landmark orientation and angular path  
393 integration. *Nature* **521**, 186–191 (2015).
- 394 9. J. S. Taube, R. U. Muller, J. B. Ranck, Head-direction cells recorded from the  
395 postsubiculum in freely moving rats. II. Effects of environmental manipulations. *Journal*  
396 *of Neuroscience* **10**, 436–447 (1990).
- 397 10. A. Finkelstein, *et al.*, Three-dimensional head-direction coding in the bat brain. *Nature*  
398 **517**, 159–164 (2015).
- 399 11. A. Sarel, A. Finkelstein, L. Las, N. Ulanovsky, Vectorial representation of spatial goals in  
400 the hippocampus of bats. *Science* **355**, 176–180 (2017).
- 401 12. Ø. A. Høydal, E. R. Skytøen, S. O. Andersson, M.-B. Moser, E. I. Moser, Object-vector  
402 coding in the medial entorhinal cortex. *Nature* **568**, 400–404 (2019).



- 403 13. R. Wehner, B. Michel, P. Antonsen, Visual navigation in insects: coupling of egocentric  
404 and geocentric information. *Journal of Experimental Biology* **199**, 129–140 (1996).
- 405 14. A. Bahl, F. Engert, Neural circuits for evidence accumulation and decision making in  
406 larval zebrafish. *Nature Neuroscience* **23**, 94–102 (2020).
- 407 15. K. Zhang, Representation of spatial orientation by the intrinsic dynamics of the head-  
408 direction cell ensemble: a theory. *J. Neurosci.* **16**, 2112–2126 (1996).
- 409 16. X. Sun, M. Mangan, S. Yue, An Analysis of a Ring Attractor Model for Cue Integration in  
410 *Biomimetic and Biohybrid Systems*, Lecture Notes in Computer Science., V. Vouloutsi,  
411 *et al.*, Eds. (Springer International Publishing, 2018), pp. 459–470.
- 412 17. L. C. York, M. C. W. van Rossum, Recurrent networks with short term synaptic  
413 depression. *J Comput Neurosci* **27**, 607–620 (2009).
- 414 18. S. I. Wiener, J. S. Taube, *Head Direction Cells and the Neural Mechanisms of Spatial*  
415 *Orientation* (MIT Press, 2005).
- 416 19. B. Collignon, A. Séguret, J. Halloy, A stochastic vision-based model inspired by zebrafish  
417 collective behaviour in heterogeneous environments. *Royal Society Open Science* **3**,  
418 150473 (2006).
- 419 20. L. Benedetti-Cecchi, L. Tamburello, E. Maggi, F. Bulleri, Experimental perturbations  
420 modify the performance of early warning indicators of regime shift. *Current Biology* **25**,  
421 1867–1872 (2015).
- 422 21. A. Gelblum, *et al.*, Ant groups optimally amplify the effect of transiently informed  
423 individuals. *Nature Communications* **6** (2015).
- 424 22. B. M. McCoy, T. T. Wu, *The two-dimensional Ising model: second edition* (Courier  
425 Corporation, 2014).
- 426 23. J.-M. Choi, A. S. Holehouse, R. V. Pappu, Physical Principles Underlying the Complex  
427 Biology of Intracellular Phase Transitions. *Annual Review of Biophysics* **49**, 107–133  
428 (2020).
- 429 24. A. A. Hyman, K. Simons, Beyond Oil and Water—Phase Transitions in Cells. *Science* **337**,  
430 1047–1049 (2012).
- 431 25. A. Strandburg-Peshkin, D. R. Farine, I. D. Couzin, M. C. Crofoot, Shared decision-making  
432 drives collective movement in wild baboons. *Science* **348**, 1358–1361 (2015).
- 433 26. R. Ratcliff, P. L. Smith, S. D. Brown, G. McKoon, Diffusion Decision Model: Current Issues  
434 and History. *Trends in Cognitive Sciences* **20**, 260–281 (2016).
- 435 27. J. R. Stowers, *et al.*, Virtual reality for freely moving animals. *Nature Methods* **14**, 995–  
436 1002 (2017).

- 437 28. T. Poggio, W. Reichardt, A theory of the pattern induced flight orientation of the fly  
438 *Musca domestica*. *Kybernetik* **12**, 185–203 (1973).
- 439 29. D. Varju, Stationary and dynamic responses during visual edge fixation by walking  
440 insects. *Nature* **255**, 330–332 (1975).
- 441 30. W. Reichardt, T. Poggio, A theory of the pattern induced flight orientation of the fly  
442 *Musca domestica* II. *Biological Cybernetics* **18**, 69–80 (1975).
- 443 31. P. K. Kaushik, M. Renz, S. B. Olsson, Characterizing long-range search behavior in Diptera  
444 using complex 3D virtual environments. *PNAS* **117**, 12201–12207 (2020).
- 445 32. E. Horn, R. Wehner, The mechanism of visual pattern fixation in the walking fly,  
446 *Drosophila melanogaster*. *Journal of Comparative Physiology A* **101**, 39–56 (1975).
- 447 33. G. K. Wallace, Some experiments on form perception in the nymphs of the desert locust,  
448 *Schistocerca gregaria* forskål. *Journal of Experimental Biology* **35**, 765–775 (1958).
- 449 34. P. T. Gonzalez-Bellido, T. J. Wardill, M. Juusola, Compound eyes and retinal information  
450 processing in miniature dipteran species match their specific ecological demands.  
451 *Proceedings of the National Academy of Sciences* **108**, 4224–4229 (2011).
- 452 35. O. Faivre, M. Juusola, Visual coding in locust photoreceptors. *Plos One* **3**, e2173 (2008).
- 453 36. M. Wilson, Angular sensitivity of light and dark adapted locust retinula cells. *Journal of*  
454 *Comparative Physiology* **97**, 323–328 (1975).
- 455 37. G. A. Linneweber, *et al.*, A neurodevelopmental origin of behavioral individuality in the  
456 *Drosophila* visual system. *Science* **367**, 1112–1119 (2020).
- 457 38. F. R. Kiral, *et al.*, Variable brain wiring through scalable and relative synapse formation in  
458 *Drosophila*. *bioRxiv* (2021) <https://doi.org/10.1101/2021.05.12.443860>.
- 459 39. S. M. Buchanan, J. S. Kain, B. L. de Bivort, Neuronal control of locomotor handedness in  
460 *Drosophila*. *PNAS* **112**, 6700–6705 (2015).
- 461 40. I. D. Couzin, J. Krause, N. R. Franks, S. A. Levin, Effective leadership and decision-making  
462 in animal groups on the move. *Nature* **433**, 4 (2005).
- 463 41. B. Nabet, N. E. Leonard, I. D. Couzin, S. A. Levin, Dynamics of Decision Making in Animal  
464 Group Motion. *J Nonlinear Sci* **19**, 399–435 (2009).
- 465 42. N. E. Leonard, *et al.*, Decision versus compromise for animal groups in motion.  
466 *Proceedings of the National Academy of Sciences* **109**, 227–232 (2012).
- 467 43. R. Gray, A. Franci, V. Srivastava, N. E. Leonard, Multiagent Decision-Making Dynamics  
468 Inspired by Honeybees. *IEEE Transactions on Control of Network Systems* **5**, 793–806  
469 (2018).

- 470 44. A. Bizyaeva, A. Franci, N. E. Leonard, A General Model of Opinion Dynamics with Tunable  
471 Sensitivity. *arXiv:2009.04332 [cs, eess, math]* (2020) (July 26, 2021).
- 472 45. I. D. Couzin, *et al.*, Uninformed individuals promote democratic consensus in animal  
473 groups. *Science* **334**, 1578–1580 (2011).
- 474 46. D. Biro, D. J. T. Sumpter, J. Meade, T. Guilford, From compromise to leadership in pigeon  
475 homing. *Current Biology* **16**, 2123–2128 (2006).
- 476 47. I. D. Couzin, J. Krause, R. James, G. D. Ruxton, N. R. Franks, Collective Memory and  
477 Spatial Sorting in Animal Groups. *Journal of Theoretical Biology* **218**, 1–11 (2002).
- 478 48. C. W. Reynolds, Flocks, herds and schools: A distributed behavioral model in *Proceedings*  
479 *of the 14th Annual Conference on Computer Graphics and Interactive Techniques*,  
480 SIGGRAPH '87., (Association for Computing Machinery, 1987), pp. 25–34.
- 481 49. T. Vicsek, A. Czirók, E. Ben-Jacob, I. Cohen, O. Shochet, Novel Type of Phase Transition in  
482 a System of Self-Driven Particles. *Phys. Rev. Lett.* **75**, 1226–1229 (1995).
- 483 50. C. C. Ioannou, M. Singh, I. D. Couzin, Potential Leaders Trade Off Goal-Oriented and  
484 Socially Oriented Behavior in Mobile Animal Groups. *The American Naturalist* **186**,  
485 284–293 (2015).
- 486 51. A. Perna, *et al.*, Individual Rules for Trail Pattern Formation in Argentine Ants  
487 (*Linepithema humile*). *PLOS Computational Biology* **8**, e1002592 (2012).
- 488 52. I. Pinkoviezky, I. D. Couzin, N. S. Gov, Collective conflict resolution in groups on the  
489 move. *Physical Review E* **97** (2018).
- 490 53. S.-I. Amari, Homogeneous nets of neuron-like elements. *Biol. Cybernetics* **17**, 211–220  
491 (1975).
- 492 54. S. Amari, Dynamics of pattern formation in lateral-inhibition type neural fields. *Biol.*  
493 *Cybern.* **27**, 77–87 (1977).
- 494 55. K. S. Kakaria, B. L. de Bivort, Ring Attractor Dynamics Emerge from a Spiking Model of  
495 the Entire Protocerebral Bridge. *Front. Behav. Neurosci.* **0** (2017).
- 496 56. L. Peliti, *Statistical Mechanics in a Nutshell* (Princeton University Press, 2011) (July 27,  
497 2021).
- 498 57. J. J. Hopfield, Neural networks and physical systems with emergent collective  
499 computational abilities. *PNAS* **79**, 2554–2558 (1982).
- 500 58. K. G. Wilson, The renormalization group and critical phenomena. *Rev. Mod. Phys.* **55**,  
501 583–600 (1983).
- 502 59. E. Schneidman, M. J. Berry, R. Segev, W. Bialek, Weak pairwise correlations imply  
503 strongly correlated network states in a neural population. *Nature* **440**, 1007–1012  
504 (2006).

505 60. S. Takagi, R. Benton, Animal Behavior: A Neural Basis of Individuality. *Current Biology* **30**,  
506 R710–R712 (2020).

507

## 508 **Materials and Methods**

509 We construct a simple, spatially-explicit model of neural decision-making to study how the  
510 brain reduces choice in the presence of numerous spatial options (adapted from (52)).  
511 Theoretical predictions obtained were then tested experimentally by exposing invertebrate  
512 (fruit flies and desert locusts) and vertebrate systems (zebrafish) to spatial choice tests in virtual  
513 reality. To identify unifying principles of spatiotemporal computation across scales of  
514 biological organisation, we also reproduce the obtained decision-making patterns with an  
515 established model of collective decision-making in animal groups.

516

517 **Neural decision-making model.** We construct a computational model of neural decision-  
518 making that takes in a representation of directions to the different targets as input, and outputs  
519 a collective vectorial representation of the agent’s future velocity (adapted from (52)). This  
520 provides us explicit predictions for animal trajectories, allows us to determine which target is  
521 reached in each realization of the simulation, and facilitates direct comparison with  
522 experimental tests. Our model is within the class of widely-employed neural ring-attractor  
523 models (see SI Appendix), which like neural field models (53, 54), and attractor network  
524 models more generally (15, 16, 55), consider the collective firing activity of the neurons, or the  
525 firing rate, as opposed to the microscopic state of each firing neuron.

526

527 In our model, the brain is composed of individual components, called “spins”, that, collectively,  
528 as a “spin system”, represent neural activity. Spin systems, which have been long-studied in  
529 physics due to their ability to give insight into a wide range of collective phenomena, from  
530 magnetic to quantum systems (56), were first introduced in the study of neurobiology by

531 Hopfield in a landmark paper (57) that provided considerable insights into principles  
532 underlying unsupervised learning and associative memory. In its simplest (and most common)  
533 formulation, as in Hopfield networks, a spin system is comprised of entities, spins, that can  
534 each be in state 0 or 1, or in the terminology of physics either ‘up’ or ‘down’. Spin systems  
535 have consistently provided deep insights into complex collective phenomena, from spin and  
536 molecular systems, to neural systems, undergoing phase transitions (58, 59) (see SI Appendix  
537 for details and discussion).

538

539 Here, the animal’s brain is characterized by a system of  $N$  spins. Each spin  $i$  encodes  
540 direction to one of the presented goals  $\hat{p}_i$ , and exists in one of two states:  
541  $\sigma_i=0$  or  $\sigma_i=1$ . We do not imply that a spin is equivalent to a neuron, but  
542 rather, as we show via a mathematical derivation, that the collective properties of interacting  
543 spins in our model is equivalent to the firing rate in the neural ring attractor model (see SI  
544 Appendix for details). Consequently, we refer to the individual components with which we  
545 model our system as “spins”, and “neural activity” as a term to represent this “firing rate”  
546 equivalent. The energy of the system (for any given configuration) is given by its Hamiltonian,  
547  $H$ .

548

$$H = -\frac{k}{N} \sum_{i \neq j} J_{ij} \sigma_i \sigma_j$$

549 where,  $k$  is the number of options available to the individual and  $J_{ij}$  is the interaction strength  
550 between neurons  $i$  and  $j$ . Here,  $J_{ij}$  is given by

551

$$J_{ij} = \cos\left(\pi \left(\frac{|\theta_{ij}|}{\pi}\right)^\nu\right)$$

552 where,  $\theta_{ij}$  is the angle between preferred directions of neurons  $i$  and  $j$ , and  $\nu$  represents the  
553 neural tuning parameter. For  $\nu = 1$ , the interactions become “cosine-shaped”  $J_{ij} = \cos(\theta_{ij})$ ,

554 and the network has a Euclidean representation of space (Fig. S1). For  $\nu < 1$ , the network has  
555 more local excitation and encodes space in a non-Euclidean manner (Fig. S1). System  
556 dynamics are implemented by energy minimization using the Metropolis-Hastings algorithm  
557 (similar to other Ising spin models) and the agent then moves with a velocity  $\vec{V}$  determined by  
558 the normalized sum of goal vectors  $\hat{p}_i$  of all active neurons.

$$559 \quad \vec{V} = \frac{v_0}{N} \sum_{i=1}^N \hat{p}_i \sigma_i$$

560 where  $v_0$  is the proportionality constant. The goal vector  $\hat{p}_i$  now points from the agent's  
561 updated location to the neuron's preferred goal with directional noise chosen from a circularly  
562 wrapped Gaussian distribution centered at 0 with a standard deviation  $\sigma_e$ . As in the mean-field  
563 approximation of the model, the timescale of movement (defined by the typical time to reach  
564 the target) in the numerical simulations was set to be much greater than the timescale of neural  
565 firing (the typical time between two consecutive changes in the neural states  $\sigma_i$ ).

566

567 **Collective decision-making model.** We reproduce results from our neural decision-making  
568 model in a model that describes spatial decision-making at a different scale of biological  
569 organization (refer (40) for methodological details). To highlight the features that are key to  
570 producing the observed bifurcation patterns, we run simulations with and without feedback on  
571 the strength of goal-orientedness of individuals.

572

573 **Fly virtual reality experiments.** All experiments were conducted on 3- to 5-day old female  
574 wild-type CS strain *Drosophila melanogaster* raised at 26°C on a 12 hr light, 12 hr dark cycle.  
575 Experiments were conducted in a flyVR setup procured from loopbio GmbH. 60 tethered  
576 *Drosophila melanogaster* were exposed to either a two-choice or a three-choice decision task  
577 (30 and 30 individuals, respectively) in the virtual reality environment. Each experimental trial

578 lasted 15 min where flies were exposed to five sets of stimuli—three experimental sets and two  
579 control sets. The experimental stimuli sets consisted of two or three black cylinders (depending  
580 on the experimental condition) that were presented to the animal in an otherwise white  
581 environment. A control stimulus with a single pillar was presented before and after the  
582 experimental conditions. We rotated all trajectories such that the  $x$  -axis points from the  
583 origin, to the centre of mass of the targets. To visualise trajectories in the various experimental  
584 conditions, we created time-normalised (proportion of maximum across a sliding time window)  
585 density maps. We then folded the data about the line of symmetry,  $y = 0$  and applied a density  
586 threshold to the time-normalised density map. A piecewise phase transition function was then  
587 fit to quantify the bifurcation.

$$588 \quad y = \begin{cases} 0 & x \leq x_c \\ A|x - x_c|^\alpha & x > x_c \end{cases}$$

589 where  $x_c$  is the critical point,  $\alpha$  is the critical exponent, and  $A$  is the proportionality constant.  
590 We also performed randomisation tests for each bifurcation where we conducted the exact fit  
591 procedure described above to data where the trajectories were randomised by keeping the  $x$ -  
592 coordinates, and swapping the  $y$ -coordinates with values from other random events.  
593 Randomizations show that the resultant fit to our experimental data were highly significant  
594 ( $p < 0.01$  for binary choice and  $p < 10^{-4}$  for the three-choice case).

595

596 Based on the amount of time it took flies to reach one of the available targets, we also classified  
597 individual fly tracks into one of two categories—direct tracks and non-direct tracks (60) (see  
598 Fig. S11A,H for details). In our model, the direct tracks were also accounted for by varying the  
599 directional tuning of spins. A high neural tuning (low  $\nu$ ) results in more directed tracks (Fig.  
600 S14).

601

602 **Locust virtual reality experiments.** All experiments were conducted on 156 instar 5 desert  
603 locusts (*Schistocerca gregaria*; 57 individuals for two-choice and 99 individuals for three-  
604 choice experiments, respectively) raised in the Animal Research Facility of the University of  
605 Konstanz. Based on our filtering criteria, 122 out of the 156 locusts were used in our analyses.  
606 Experiments were conducted in a locustVR setup procured from loopbio GmbH (27). The  
607 experimental procedure was identical to the one described above for flies, except now, each  
608 experimental trial lasted 48 min—three experimental sets (12 min each) and two control sets  
609 (6 min each). Analyzing bifurcations in locust trajectories using the same methods described  
610 above showed that the resultant bifurcations fit to our experimental data were highly significant  
611 ( $p < 0.01$  for binary choice and  $p < 10^{-4}$  for the three-choice case).

612

613 Similar to the flies, the locust trajectories were also classified as direct, or non-direct tracks.  
614 However, because the locustVR system allowed the animals to stop and reconsider movement  
615 during the decision-making process, we added an additional category to classification of  
616 individual locust tracks *viz.* the wandering tracks (see Fig. S12A,J for details).

617

618 **Fish virtual reality experiments.** All experiments were conducted on 1 cm  $\pm$  0.1 cm long  
619 zebrafish (*Danio rerio*) of age 24 to 26 days post-fertilisation raised in a room at 28 °C on a 16  
620 hr light, 8 hr dark cycle. 440 fish were tested in total. Of these, 198 fish were exposed to  
621 decision-making with two virtual targets, 39 fish were exposed to decision-making with three  
622 equidistant virtual targets, and 50 fish were exposed to decision-making with three targets in  
623 asymmetric geometry (see SI Appendix for more details). Experiments were conducted in a  
624 fishVR setup procured from loopbio GmbH (refer (27) for details). Once a fish was introduced  
625 in the arena, it was given 20 min to acclimatize to the environment. This was followed by a 10  
626 min control where it was presented a single virtual conspecific circling the arena in a circle of



627 radius 8 cm. After this, for experiments in symmetric geometries, the real fish was exposed to  
628 choice experiments that lasted 90 min with the virtual fish initialized with random lateral  
629 distances between them and random swim direction. To visualize the bifurcations, we  
630 normalized (proportion of maximum) and stacked the marginal distributions along the direction  
631 of the virtual fish's motion for various lateral distances. For experiments in asymmetric  
632 geometries, the real fish was exposed to choice experiments where distance between the center  
633 virtual fish and its closer neighbor was 0.03 m and its distance to the other neighbor was 0.09  
634 m (Fig. 4). All experiments were conducted in accordance with the animal ethics permit  
635 approved by Regierungspräsidium Freiburg, G-17/170.

636

637 **Acknowledgements.** We thank all members of the Department of Collective Behaviour who  
638 assisted with the project: Renaud Bastien for modelling discussions and help setting up the VR  
639 experiments, Guy Amichay for providing control data of two real fish swimming together, and  
640 Paul Szyszka for showing V.H.S. how to tether flies. We thank the 'Itai Cohen Lab' for the  
641 fruit fly image used in Fig. \ref{fig:insects}, Jitin Thomas for help with visualizations in Unity  
642 and Andreas Poehlmann, John Stowers and Max Hofbauer from loopbio GmbH for technical  
643 support with the VR systems. V.H.S., L.L., B.R.S. and I.D.C. are also grateful to the animal  
644 care at the University of Konstanz including Christine Bauer, Jayme Weglarski and Dominique  
645 Leo for help in conducting the experiments. They also acknowledge the efforts of the scientific  
646 and technical staff at the University of Konstanz including Michael Mende, Markus Miller,  
647 Mäggi Hieber Ruiz and Daniel Piechowski. V.H.S. acknowledges the International Max Planck  
648 Research School (IMPRS) for Organismal Biology for the graduate school community and  
649 access to courses and resources. I.D.C. acknowledges support from the NSF (IOS-1355061),  
650 the Office of Naval Research grant (ONR, N00014-19-1-2556), the Struktur- und  
651 Innovationsfonds für die Forschung of the State of Baden-Württemberg, the Deutsche

652 Forschungsgemeinschaft (DFG, German Research Foundation) under Germany's Excellence  
653 Strategy-EXC 2117-422037984 and the Max Planck Society. N.S.G. is the incumbent of the  
654 Lee and William Abramowitz Professorial Chair of Biophysics and acknowledges support by  
655 the Minerva Foundation (grant no. 712601). M.N acknowledges support from the Eötvös  
656 Loránd Research Network (a grant to the MTA-ELTE 'Lendület' Collective Behaviour  
657 Research Group, grant number 95152, and MTA-ELTE Statistical and Biological Research  
658 Group) and Eötvös Loránd University. Additionally, all authors thank two anonymous referees  
659 for their constructive comments during the review process.

660

661 **Author contributions.** V.H.S. and I.D.C. designed the study; V.H.S., D.G., T.S., N.S.G. and  
662 I.D.C. constructed the model; D.G. and N.S.G. constructed the mean-field approximation;  
663 V.H.S. and I.D.C. designed the fly experiments; V.H.S. conducted these experiments and  
664 analyzed the data with L.L. and M.N.; V.H.S., B.R.S. and I.D.C. designed the locust  
665 experiments; B.R.S. conducted these experiments and V.H.S. analyzed the data with M.N.;  
666 L.L. and I.D.C. designed the fish experiments; L.L. conducted these experiments and analyzed  
667 this data with V.H.S. and M.N.; V.H.S. and I.D.C. drafted the manuscript with significant  
668 contributions from all authors.

669

670 **Competing interests.** The authors declare that they have no competing interests.

671 **Figures.**

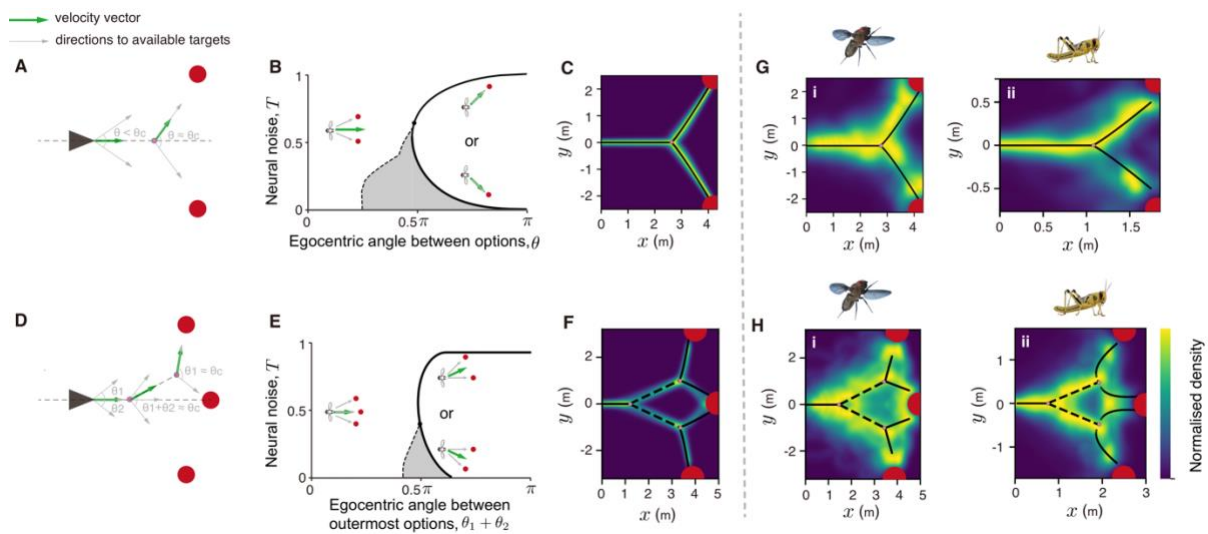

672

673 **Fig. 1.** Geometrical principles of two-choice and three-choice decision-making. (A) Schematic  
 674 of the binary decision-making experiments. This simplified representation shows that a sharp  
 675 transition in the animal’s direction of travel is expected near a critical angle,  $\theta_c$ . (B) A phase  
 676 diagram describing the ‘critical’ transition exhibited while moving from compromise to  
 677 decision between two options in space. The shaded area (also in E) represents the region in  
 678 parameter space where both the compromise, and the decision solutions exist. (C) Density plot  
 679 showing trajectories predicted by the neural model in a two-choice context. The axes represent  
 680  $x$  – and  $y$  –coordinates in Euclidean space. The black line (also in G) presents a piecewise  
 681 phase-transition function fit to the bifurcation. (D) Schematic of three-choice decision-making  
 682 experiments, where the central target is on the angle bisector of the angle subtended by the  
 683 other two targets. (E) A phase diagram describing the first ‘critical’ transition when the  
 684 individual chooses among three options. Once the individual eliminates one of the outermost  
 685 targets, it can decide between the two remaining options, similar to the two-choice phase  
 686 diagram described in B. (F) Theoretical predictions for decision-making in a three-choice  
 687 context. The dashed line (also in H) is the bisector of the angle subtended by center target and  
 688 the corresponding side target on the first bifurcation point. See Table S1 for parameters used  
 689 in C and F. (G) and (H) Density plots from experiments conducted with flies and locusts

690 choosing among two and three options, respectively. Note that the density plots presented here  
691 are for the non-direct tracks, which constitute the majority type of trajectory adopted by both  
692 flies and locusts (Figs. S11 and S12). However, our conclusions do not differ if we use all,  
693 unfiltered, data (Figs. S11G,N and S12I,R).  
694

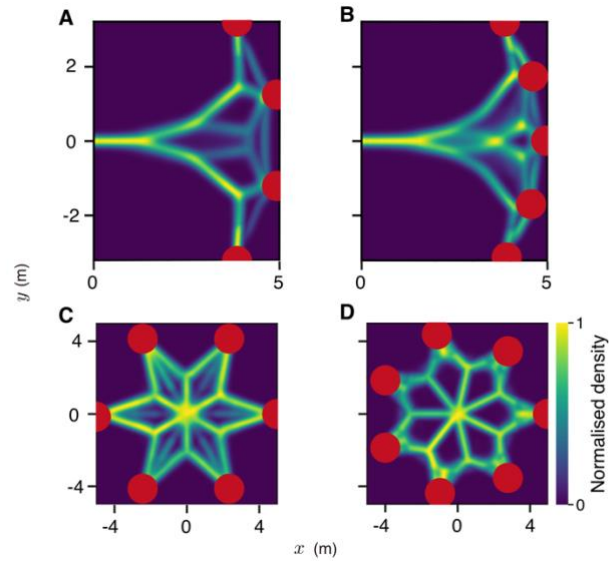

695

696 **Fig. 2.** Decision-making for a larger number of targets. Density plots of simulated trajectories  
697 for four- (A), five- (B), six- (C) and seven-choice (D) decision-making when targets are placed  
698 equidistant and equiangular from the agent. These axes represent  $x$  – and  $y$  –coordinates in  
699 Euclidean space. Geometrical configurations are also varied to place the targets on the same  
700 side of the agent (A and B) or in radial symmetry (C and D). See Table S1 for parameters used  
701 in A–C. In D, all parameters used are identical except the system size  $N = 70$ .

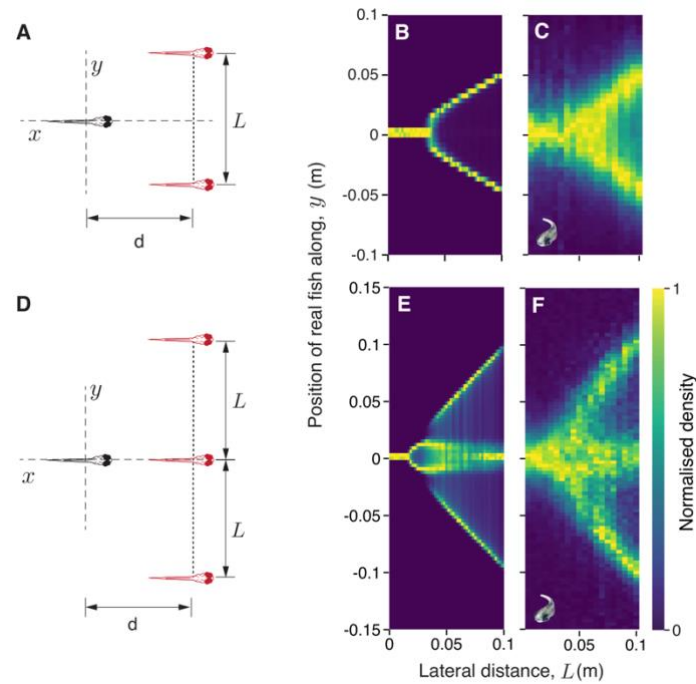

702

703 **Fig. 3.** Decision-making in a moving frame-of-reference. (A) Schematic of the two-choice

704 decision-making experiments conducted with larval zebrafish. In these experiments (also in the

705 three-choice experiments depicted in D), the virtual fish swim parallel to each other while

706 maintaining a fixed lateral distance,  $L$  between them. We only consider data where the real fish

707 swims behind the virtual fish, i.e., it follows the virtual fish (see SI Appendix and Fig. S15 for

708 details). (B) Normalized probability distribution (proportion of maximum) of simulated

709 positions of an agent following two moving targets, and corresponding experiments (C)

710 conducted with larval zebrafish following two virtual conspecifics. (D) Schematic

711 representation of the three-choice decision-making experiments. (E) Normalized probability

712 distributions of simulated positions of an agent following three moving targets, and

713 corresponding experiments (F) conducted with larval zebrafish following three virtual

714 conspecifics. See Table S1 for model parameters used in B and E.

715

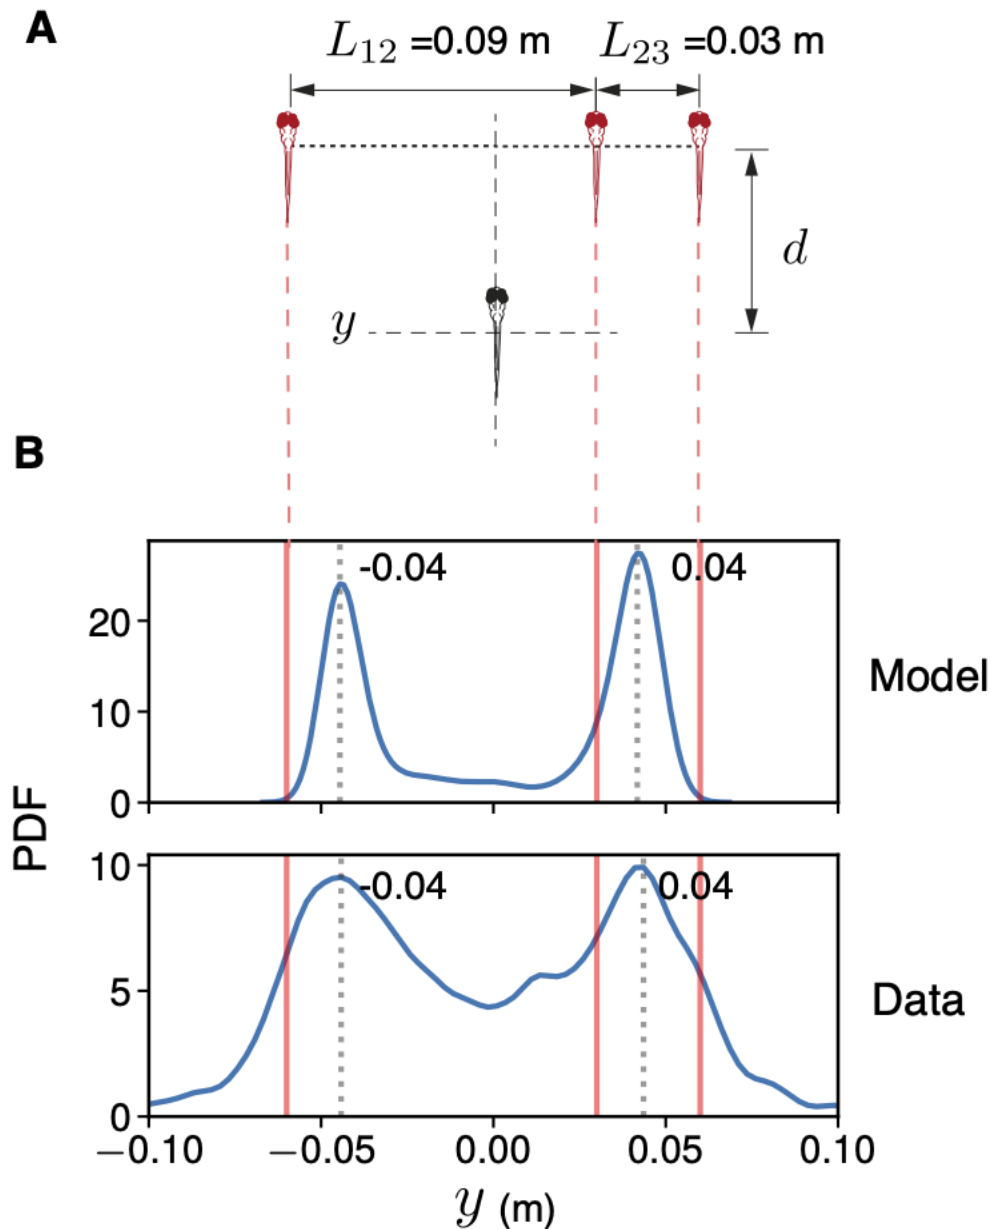

716

717 **Fig. 4.** Decision-making with the targets in an asymmetric geometry. (A) Schematic of the  
718 asymmetric choice test presented to larval zebrafish. In these experiments, the virtual fish  
719 swim parallel to each other while maintaining a fixed lateral distance,  $L$  between them. To  
720 create asymmetry in the geometry, the center fish swims closer to one of the side fish than the  
721 other ( $L_{12} = 0.09 \text{ m}$  and  $L_{23} = 0.03 \text{ m}$ ). (B) The upper panel shows the probability density  
722 function of simulated positions of an agent following three moving targets in an asymmetric  
723 geometry corresponding to the experiments. The simulated agent occupies a position of  $y =$

724  $\pm 0.04$  m while following the targets ( $v = 0.7$ ;  $\sigma_\theta = 0.3$ ). The lower panel shows the  
725 probability density function of the position of the real fish along the axis perpendicular to its  
726 direction of motion. As predicted by our model, the real fish considers the two virtual  
727 conspecifics closer to each other as a single target and adopts one of two positions behind the  
728 virtual fish.  
729



730

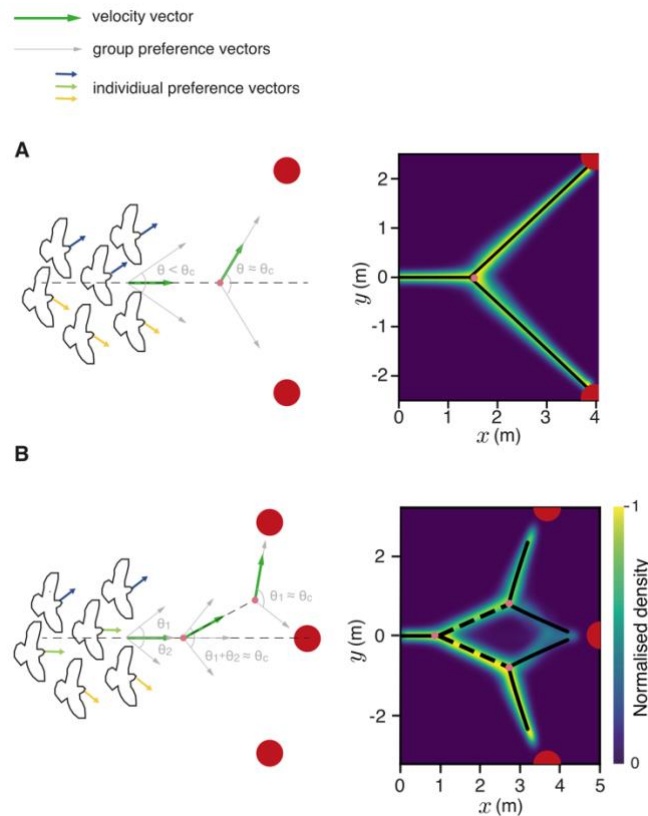

731

732 **Fig. 5.** Consensus decision-making in simulations of animal groups follow the same  
733 geometrical principles. Results for two- (A) and three-choice (B) decision-making in a model  
734 of animal collectives. The density plots show trajectories adopted by the centroid of the animal  
735 group for 500 replicate simulations where the groups don't split. The axes represent  $x$  – and  
736  $y$  –coordinates in Euclidean space. The black lines show a piecewise phase-transition function  
737 fit to the trajectories. For the three-choice case (B), the dashed line is the bisector of the angle  
738 subtended by center target and the corresponding side target on the first bifurcation point. See  
739 Table S2 for parameters used.
