# 1 **The geometry of decision-making**

2 **Vivek Hari Sridhar<sup>a,b,c,1</sup>, Liang Li<sup>a,b,c,1</sup>, Dan Gorbonos<sup>a,b,c</sup>, Máté Nagy<sup>a,b,c,d,e,f</sup>, Bianca R.**  
3 **Schell<sup>g</sup>, Timothy Sorochnik<sup>h,i</sup>, Nir S. Gov<sup>i</sup> and Iain D. Couzin<sup>a,b,c,1</sup>**

4 <sup>a</sup>Department of Collective Behaviour, Max Planck Institute of Animal Behavior, Konstanz, 78464 Konstanz,  
5 Germany

6 <sup>b</sup>Centre for the Advanced Study of Collective Behaviour, University of Konstanz, 78464 Konstanz, Germany

7 <sup>c</sup>Department of Biology, University of Konstanz, 78464 Konstanz, Germany

8 <sup>d</sup>MTA-ELTE Statistical and Biological Physics Research Group, Hungarian Academy of Sciences, 1117,  
9 Budapest, Hungary

10 <sup>e</sup>MTA-ELTE 'Lendület' Collective Behaviour Research Group, Hungarian Academy of Sciences, 1117,  
11 Budapest, Hungary

12 <sup>f</sup>Department of Biological Physics, Eötvös Loránd University, 1117, Budapest, Hungary

13 <sup>g</sup>Department of Chemistry, University of Konstanz, 78464 Konstanz, Germany

14 <sup>h</sup>Department of Physics & Astronomy, University of Waterloo, Waterloo, ON N2L 3G1, Canada

15 <sup>i</sup>Department of Chemical and Biological Physics, Weizmann Institute of Science, Rehovot 76100, Israel

16

17 **Choosing among spatially-distributed options is a central challenge for animals, from**  
18 **deciding among alternative potential food sources or refuges, to choosing with whom to**  
19 **associate. Using an integrated theoretical and experimental approach (employing**  
20 **immersive virtual reality), we consider the interplay between movement and vectorial**  
21 **integration during decision-making regarding two, or more, options in space. In**  
22 **computational models of this process we reveal the occurrence of spontaneous and abrupt**  
23 **"critical" transitions (associated with specific geometrical relationships) whereby**  
24 **organisms spontaneously switch from averaging vectorial information among, to**  
25 **suddenly excluding one, among the remaining options. This bifurcation process repeats**  
26 **until only one option---the one ultimately selected---remains. Thus we predict that the**

27 **brain repeatedly breaks multi-choice decisions into a series of binary decisions in**  
28 **space-time. Experiments with fruit flies, desert locusts, and larval zebrafish reveal that**  
29 **they exhibit these same bifurcations, demonstrating that across taxa and ecological**  
30 **context, we show that there exist fundamental geometric principles that are essential to**  
31 **explain how, and why, animals move the way they do.**

32

33 Animals constantly face the need to make decisions, and many such decisions require choosing  
34 among multiple spatially-distributed options. Despite this, most studies have focused on the  
35 outcome of decisions (1–3) (i.e. which option among alternatives is chosen), as well as the time  
36 taken to make decisions (4–6), but seldom on the movement of animals throughout the  
37 decision-making process. Motion is, however, crucial in terms of how space is represented by  
38 organisms during spatial decision-making; the brains of a wide range of species, from insects  
39 (7, 8) to vertebrates (9, 10), have been shown to represent egocentric spatial relationships, such  
40 as the position of desired targets, via explicit vectorial representation (11, 12). Such neuronal  
41 representations must, and do, change as animals move through space. Thus, while the  
42 movement of an animal may, initially, appear to simply be a readout of the decision made by  
43 the brain—and consequently not particularly informative—this view overlooks important  
44 dynamical properties introduced into the decision-making process that result from the  
45 inevitable time-varying geometrical relationships between an organism and spatially-  
46 distributed options (i.e. potential ‘targets’ in space).

47

48 Due to a dearth of existing studies, and with the objective to develop the necessary foundational  
49 understanding of the ‘geometry’ of decision-making, we focus here—first theoretically and  
50 then experimentally—on the consequences of the recursive interplay between movement and  
51 (collective) vectorial integration in the brain during relatively simple spatial decisions. We

52 employ immersive virtual reality to investigate decision-making regarding multiple (2 or more)  
53 options in both invertebrate (the fruit fly *Drosophila melanogaster*, and desert locust  
54 *Schistocerca gregaria*) and vertebrate (larval zebrafish *Danio rerio*) models. Doing so allows  
55 us to reveal the emergence of geometric principles that transcend the study organism and the  
56 decision-making context, and thus are expected to be broadly relevant across taxa. In support  
57 of this finding we also explore how these principles extend to collective decision-making in  
58 mobile animal groups, allowing us to gain insights across three scales of biological  
59 organisation, from neural dynamics, to both individual and collective decision-making.

60

## 61 **Modelling decision-making on the move**

62 Congruent with neurobiological studies of the invertebrate and vertebrate brain, we consider  
63 organisms to have an egocentric vectorial representation of spatial options (11–13). We then  
64 consider the collective dynamics of vector integration in the brain assuming there exists  
65 reinforcement (excitation/positive feedback) among neural ensembles that have similar  
66 directional representations (goal vectors), and global inhibition and/or negative feedback (both  
67 produce broadly similar results, see SI Appendix and Fig. S1) among neural ensembles that  
68 differ in vectorial representation. This captures, in a simple mathematical formulation, the  
69 essence of both explicit ring-attractor networks (as found in insects (7)), and computation  
70 among competing neural groups (as in the mammalian brain (14)). The animal's relative  
71 preference for a target is given by activity of neurons that encode direction to that target relative  
72 to activity of neurons that encode direction to other targets, and the angular sensitivity of the  
73 neural representations (angular difference at which excitation no longer occurs) is specified by  
74 a neural tuning parameter,  $\nu$ . The network then computes, spontaneously via iterative collective  
75 dynamics, a unique 'consensus' vector ('activity bump') that, along with some angular noise,  
76 represents the animal's desired direction of movement (Fig. S2). This is then translated into

77 motor output (see SI Appendix for model details (15)). Stochasticity in neural dynamics is  
78 implemented here as the neural noise parameter,  $T$ .

79

80 While capturing known, generic features of neural integration, our model is deliberately  
81 minimal. This serves multiple purposes: firstly, following principles of maximum parsimony  
82 we seek to find a simple model that can both predict and explain, the observed phenomena;  
83 secondly, we aim to reveal general principles and thus consider features that are known to be  
84 valid across organisms irrespective of inevitable difference in structural organization of the  
85 brain; thirdly, analytical tractability of our model provides deeper insights into the system  
86 dynamics; and, finally, our results are shown to be extremely robust to model assumptions,  
87 suggesting that it provides an appropriate low-level description of essential system properties.

88

## 89 **Deciding between two options**

90 Beginning with the simplest case, we consider the feedback between motion and internal  
91 vectorial-computation when an animal is presented with two equally-attractive, but spatially-  
92 discrete, options. In this case the activity of neurons encoding option 1,  $N_1$  will be equal to  
93 those encoding option 2,  $N_2$  (Fig. 1A). Our model predicts that an animal moving, from a  
94 relatively distant location, towards the two targets, will spontaneously compute the average  
95 directional preference, resulting in corresponding motion in a direction oriented between the  
96 two targets. As it approaches the targets, however, upon reaching a certain angular difference  
97 between the options, the internal network undergoes a sudden transition in which it  
98 spontaneously selects one, or the other, target (Fig. 1C). This results in an abrupt change in  
99 trajectory, the animal being redirected towards the respective ‘selected’ target (Fig. 1C; see  
100 also Fig. S3A for the same phenomenon occurring for a wide range of starting positions).

101

102 Our model therefore predicts that despite the fact that the egocentric geometrical relationship  
103 between the animal and the targets changes continuously, upon approaching the targets, there  
104 exists a location whereby a further, very small, increase in angular difference between the  
105 targets will result in a sudden change in system (neural) dynamics, and consequently in motion,  
106 and thus decision-making.

107

108 In numerical analysis of our model we find that irrespective of starting position, as the animal  
109 reaches the respective angle in space it will relatively suddenly select one of the options (Fig.  
110 S3A). While the specific angular difference at which this phenomenon occurs is dependent on  
111 neural tuning,  $\nu$  (Fig. S3C), and the starting configuration (due to an interplay between the two  
112 timescales involved—for movement and for neural consensus, see Fig. S3B), it is always  
113 present as long as the neural noise,  $T$  remains below a critical firing rate,  $T_c$  (although even for  
114  $T < T_c$ , these bifurcations may be difficult to see for small values of  $\nu$  due to inherent noise in  
115 real biological systems; see Fig. S4 for simulations where vectorial representations of targets  
116 include directional error).

117

118 To gain a deeper insight into the mechanism underlying the observed spatiotemporal dynamics,  
119 we constructed a mean-field approximation (see SI Appendix) since this has the advantage of  
120 allowing us to conduct formal analyses of patterns realized in the simulated trajectories.

121

## 122 **Geometric principles of decision-making**

123 The mean-field analysis of our model shows that below a critical level of neural noise, animals  
124 will adopt the average among options as they approach the targets, until a critical phase  
125 transition upon which the system spontaneously switches to deciding among the options (Figs.

126 1B and S5A). Thus despite varying in its exact location (Fig. 1B), the sudden transition  
127 observed is an inevitable consequence of the system dynamics and will always occur.

128

129 Such sudden transitions correspond to ‘bifurcations’ in the mathematical study of dynamical  
130 systems. A bifurcation is said to occur when a smooth change in an external parameter, in this  
131 case perceived angular difference between the options, causes a sudden qualitative change in  
132 the system’s behavior, here corresponding to a literal bifurcation (or branching) in physical  
133 space.

134

135 When dynamical systems undergo such a phase transition they exhibit a remarkable universal  
136 property: close to the phase transition, at the “critical-point” or “tipping-point”, the system  
137 spontaneously becomes extremely sensitive to very small perturbations (e.g. to small  
138 differences in preference between options (16, 17)). This is true of both physical (e.g. magnetic  
139 (18)) and biotic systems (e.g. ecosystems (16, 19–21)) undergoing a phase transition.  
140 Correspondingly, we find that below a critical level of neural noise, the mean-field model  
141 exhibits a sudden increase in susceptibility as the animal approaches the critical point,  
142 immediately prior to the decision being made (Fig. S5A). Thus, as animals approach targets  
143 we predict they will pass through a window of space (corresponding to the critical angle for  
144 the respective geometry they are experiencing) in which their brain spontaneously becomes  
145 capable of discriminating between very small differences between options (e.g. a very small  
146 difference in neuronal activity being in ‘favor’ of one option; see Fig. S3D and SI Appendix  
147 for details). This highly-valuable property (for decision-making) is not built into the model,  
148 but is rather an emergent property of the inherent collective dynamics.

149

150 In many real biological systems, including the ones we consider here, the (neural) system size  
151 is typically not large enough to consider true phase transitions (which only occur for very large  
152 systems, as per the mean-field approximation), but rather ‘phase-transition-like’ behavior.  
153 Even though real biological systems are not necessarily close to the infinite size limit of the  
154 mean-field approximation, we see very similar dynamics for both small and large system sizes  
155 (Fig. S6).

156

### 157 **Decision-making beyond two options**

158 While the majority of decision-making studies consider only two options (due to both  
159 theoretical and experimental tractability (14, 22, 23)), animals moving in real space frequently  
160 encounter a greater number than this. Here we consider how animals will be expected to select  
161 among three, or more, options (possible targets) in space. First we begin with three identical  
162 options ( $N_1 = N_2 = N_3$ ) since this gives us the clearest insight into the relationship between  
163 motion and decision-making dynamics. Then we relax these assumptions and consider  
164 differences between options (Fig. S3E) as well as a greater number of options (Fig. 2). Note  
165 that we do not modify our model in any way prior to introducing these additional complexities.

166

167 Below  $T_c$  (see SI Appendix and Fig. S7 for considerations when  $T > T_c$ ), we once again find  
168 that the direction in which the animal moves is a function of the angular difference between  
169 the targets. When relatively far from the targets, it moves in the average of these three  
170 directions. Upon reaching a critical angular threshold between the leftmost and rightmost  
171 option (from the animal’s perspective), however, the neural system spontaneously eliminates  
172 one of them and the animal begins moving in the direction average between the two remaining  
173 options (Fig. 1D and E). It continues in this direction until a second critical angle is reached,  
174 and now the animal eliminates one of the two remaining options and moves towards the only

175 remaining target (Figs. 1F and S5B). Thus we predict that the brain repeatedly breaks multi-  
176 choice decisions into a series of binary decisions in space-time. Simulating a larger number of  
177 options (Fig. 2) and varying environmental geometries (Figs. S8 and S9) demonstrates the  
178 robustness of this mechanism in the face of environmental complexity and the more complex  
179 spatial dynamics that emerge as organisms undergo repeated bifurcations.

180

## 181 **Experimental tests of our predictions**

182 Since the decision-process is sequential and depends on the geometry with respect to the targets  
183 from an egocentric perspective, it can be visualized in the animals' trajectories. Our theoretical  
184 studies make a key testable prediction: if neural groups within the decision-making ensemble  
185 exhibit relatively local excitation, and long-range/global inhibition, we should observe  
186 bifurcations in the animals' trajectories as they choose among identical options; and that if  
187 animals face three (or more) such options, then the complex decision task should be broken  
188 down to a series of binary decisions.

189

190 Since the geometrical principles revealed above are expected to be both robust and generic, we  
191 use immersive virtual reality (24) (Fig. S10) to test our predictions by investigating both two-  
192 and three-choice decision-making in three evolutionarily highly-divergent brains under  
193 ecologically-relevant scenarios: fruit flies (*Drosophila melanogaster*) and desert locusts  
194 (*Schistocerca gregaria*) deciding which among multiple vertical objects to approach (e.g. to  
195 perch), and zebrafish (*Danio rerio*) choosing with which conspecific(s) to school.

196 Like many other insects (25–28), fruit flies (29) and desert locusts (30) exhibit a natural  
197 tendency to orient and move towards high-contrast vertical features (potential landing sites or  
198 indicators of vegetation) in their environment. We exploit this tendency, presenting multiple  
199 identical black pillars as targets in an otherwise white environment. We record trajectories of

200 our focal animals (solitary flies or locusts) as they choose to move towards one of these pillars,  
201 thus obtaining a behavioral readout of the decision-making process (see SI Appendix for  
202 experimental details; Figs. S11 and S12 show raw trajectories of flies and locusts respectively).

203

204 As predicted by our theory (Fig. 1B and C), we find that, in the two-choice case, both flies and  
205 locusts initially move in the average of the egocentric target directions until a critical angular  
206 difference, at which point they select (randomly) one, or the other, option and move towards it  
207 (randomization test where  $y$  –coordinates between trajectories were swapped showed that the  
208 bifurcation fit to our experimental data was highly significant;  $p < 0.01$  for both flies and  
209 locusts; Fig. 1G). In the three-choice case, the animals' movements are also consistent with our  
210 theory; as predicted (Fig. 1E and F) they break the three-choice decision into two sequential  
211 binary decisions ( $p < 10^{-4}$  for both flies and locusts; Fig. 1H). For both animals, the observed  
212 angle of bifurcation ( $\sim 110^\circ$  for flies and  $\sim 90^\circ$  for locusts) is much larger than their visual  
213 spatial resolution ( $\sim 8^\circ$  and  $\sim 2^\circ$  for flies (31) and locusts (32, 33).

214

215 Our zebrafish experiments consider spatial decision-making in a social context. We present  
216 virtual conspecifics (see SI Appendix for methodological details) that move back-and-forth in  
217 the arena parallel to each other as targets (Figs. 3A and S13A) and behave (Fig. S14), and are  
218 responded to (Fig. S15), in the same way as real fish. Because they are social, the real fish  
219 respond to these virtual fish by tending to follow at a (relatively) fixed distance behind them  
220 (Fig. S13E). Our data are best represented within this moving frame of reference (the virtual  
221 fish; Fig. S13). Theoretically we predict that for two virtual fish we should see a single  
222 bifurcation, where the real fish will suddenly switch from averaging the target directions to  
223 deciding among them (i.e. swimming predominantly with one of the virtual fish), as a function  
224 of increasing the lateral distance,  $L$ , between the virtual fish (Figs. 3B and S16; see SI Appendix

225 for details of model implementation). The existence of this bifurcation is clearly seen in our  
226 experiments (Fig. 3C). When considering three moving virtual conspecifics, the model predicts  
227 that real fish will spontaneously break the three-choice decision to two binary decisions, and a  
228 comparison of the theoretical prediction and experimental results demonstrates this to be the  
229 case (c.f. Fig. 3E and F). Although detailed models considering the specifics of each system  
230 would be expected to provide additional quantitative fits (at the expense of losing some degree  
231 of generality and analytical tractability), our results are broadly independent of the model  
232 implementation details. Thus, we find that the key predictions of our model are validated in  
233 fruit flies, desert locusts and larval zebrafish in distinct, yet ecologically relevant contexts.

234

235 Our results demonstrate that, across taxa and contexts, explicitly considering the time-varying  
236 geometry during spatial decision-making provides new insights that are essential in order to  
237 understand how, and why, animals move the way they do. The features we have revealed are  
238 highly robust, and we predict that they occur in decision-making processes across various  
239 scales of biological organisation, from mobile neural groups (individuals) to animal collectives  
240 (see Supplementary Fig. 17, Supplementary Fig. 18 and Supplementary Information),  
241 suggesting they are general features of spatiotemporal computation. In addition, while here we  
242 investigate relatively simple decisions allowing us to reveal the geometrical principles at work,  
243 this framework—and the fundamental features outlined here—can readily serve as a general  
244 foundation for future investigations of more complex aspects of spatial decision-making.

245

## 246 **A link to collective decision-making**

247 In the two-choice context, our results of individual decision-making are reminiscent of  
248 collective decision-making in animal groups (fish schools (34), bird flocks (35) and baboon  
249 troops (22)). In order to draw a formal link between these two scales of biological

250 organization—decision-making in the brain, and decision-making in animal groups—we  
251 consider a model of collective decision-making (36) with equal number of individuals  
252 exhibiting preference for each target (see SI Appendix for methodological details). Consistent  
253 with our above results, we find that even in groups, animals must reduce multi-choice decisions  
254 to a series of binary decisions (Fig. 4). Thus, our work provides a first evidence that similar  
255 principles underlie decision-making in distinct systems across multiple scales of biological  
256 organization. Furthermore, by presenting social interactions in a decision-making context, our  
257 zebrafish experiments elucidate the neural basis of schooling allowing us to glean insights  
258 across three scales of biological organization—from neural dynamics to individual decisions,  
259 and from individual decisions to collective movement.

260

## 261 **Conclusions**

262 We demonstrate that, across taxa and contexts, explicitly considering the time-varying  
263 geometry during spatial decision-making provides new insights that are essential to understand  
264 how, and why, animals move the way they do. The features revealed here are highly robust,  
265 and we predict that they occur in decision-making processes across various scales of biological  
266 organization, from individuals to animal collectives (see Figs. 4 and S18, and SI Appendix),  
267 suggesting they are fundamental features of spatiotemporal computation.

268

## 269 **References**

- 270 1. C. E. J. Kennedy, J. A. Endler, S. L. Poynton, H. McMinn, Parasite load predicts mate  
271 choice in guppies. *Behav Ecol Sociobiol* **21**, 291–295 (1987).
- 272 2. K. Summers, R. Symula, M. Clough, T. Cronin, Visual mate choice in poison frogs.  
273 *Proceedings of the Royal Society of London. Series B: Biological Sciences* **266**, 2141–  
274 2145 (1999).
- 275 3. E. Forsgren, Predation Risk Affects Mate Choice in a Gobiid Fish. *The American*  
276 *Naturalist* **140**, 1041–1049 (1992).

- 277 4. R. Kiani, L. Corthell, M. N. Shadlen, Choice Certainty Is Informed by Both Evidence and  
278 Decision Time. *Neuron* **84**, 1329–1342 (2014).
- 279 5. J. M. Beck, *et al.*, Probabilistic Population Codes for Bayesian Decision Making. *Neuron*  
280 **60**, 1142–1152 (2008).
- 281 6. A. K. Churchland, R. Kiani, M. N. Shadlen, Decision-making with multiple alternatives.  
282 *Nature Neuroscience* **11**, 693–702 (2008).
- 283 7. S. S. Kim, H. Rouault, S. Druckmann, V. Jayaraman, Ring attractor dynamics in the  
284 *Drosophila* central brain. *Science* **356**, 849–853 (2017).
- 285 8. J. D. Seelig, V. Jayaraman, Neural dynamics for landmark orientation and angular path  
286 integration. *Nature* **521**, 186–191 (2015).
- 287 9. J. S. Taube, R. U. Muller, J. B. Ranck, Head-direction cells recorded from the  
288 postsubiculum in freely moving rats. II. Effects of environmental manipulations.  
289 *Journal of Neuroscience* **10**, 436–447 (1990).
- 290 10. A. Finkelstein, *et al.*, Three-dimensional head-direction coding in the bat brain. *Nature*  
291 **517**, 159–164 (2015).
- 292 11. A. Sarel, A. Finkelstein, L. Las, N. Ulanovsky, Vectorial representation of spatial goals  
293 in the hippocampus of bats. *Science* **355**, 176–180 (2017).
- 294 12. Ø. A. Høydal, E. R. Skytøen, S. O. Andersson, M.-B. Moser, E. I. Moser, Object-vector  
295 coding in the medial entorhinal cortex. *Nature* **568**, 400–404 (2019).
- 296 13. R. Wehner, B. Michel, P. Antonsen, Visual navigation in insects: coupling of egocentric  
297 and geocentric information. *Journal of Experimental Biology* **199**, 129–140 (1996).
- 298 14. A. Bahl, F. Engert, Neural circuits for evidence accumulation and decision making in  
299 larval zebrafish. *Nature Neuroscience* **23**, 94–102 (2020).
- 300 15. I. Pinkoviezky, I. D. Couzin, N. S. Gov, Collective conflict resolution in groups on the  
301 move. *Physical Review E* **97** (2018).
- 302 16. L. Benedetti-Cecchi, L. Tamburello, E. Maggi, F. Bulleri, Experimental perturbations  
303 modify the performance of early warning indicators of regime shift. *Current Biology* **25**,  
304 1867–1872 (2015).
- 305 17. A. Gelblum, *et al.*, Ant groups optimally amplify the effect of transiently informed  
306 individuals. *Nature Communications* **6** (2015).
- 307 18. B. M. McCoy, T. T. Wu, *The two-dimensional Ising model: second edition* (Courier  
308 Corporation, 2014).
- 309 19. C. Boettiger, A. Hastings, From patterns to predictions. *Nature* **493**, 157–158 (2013).
- 310 20. C. Wissel, A universal law of the characteristic return time near thresholds. *Oecologia*  
311 **65**, 101–107 (1984).

- 312 21. T. M. Lenton, Early warning of climate tipping points. *Nature Climate Change* **1**, 201–  
313 209 (2011).
- 314 22. A. Strandburg-Peshkin, D. R. Farine, I. D. Couzin, M. C. Crofoot, Shared decision-  
315 making drives collective movement in wild baboons. *Science* **348**, 1358–1361 (2015).
- 316 23. R. Ratcliff, P. L. Smith, S. D. Brown, G. McKoon, Diffusion Decision Model: Current  
317 Issues and History. *Trends in Cognitive Sciences* **20**, 260–281 (2016).
- 318 24. J. R. Stowers, *et al.*, Virtual reality for freely moving animals. *Nature Methods* **14**, 995–  
319 1002 (2017).
- 320 25. T. Poggio, W. Reichardt, A theory of the pattern induced flight orientation of the fly  
321 *Musca domestica*. *Kybernetik* **12**, 185–203 (1973).
- 322 26. D. Varju, Stationary and dynamic responses during visual edge fixation by walking  
323 insects. *Nature* **255**, 330–332 (1975).
- 324 27. W. Reichardt, T. Poggio, A theory of the pattern induced flight orientation of the fly  
325 *Musca domestica* II. *Biological Cybernetics* **18**, 69–80 (1975).
- 326 28. P. K. Kaushik, M. Renz, S. B. Olsson, Characterizing long-range search behavior in  
327 Diptera using complex 3D virtual environments. *PNAS* **117**, 12201–12207 (2020).
- 328 29. E. Horn, R. Wehner, The mechanism of visual pattern fixation in the walking fly,  
329 *Drosophila melanogaster*. *Journal of Comparative Physiology A* **101**, 39–56 (1975).
- 330 30. G. K. Wallace, Some experiments on form perception in the nymphs of the desert locust,  
331 *Schistocerca gregaria* forskål. *Journal of Experimental Biology* **35**, 765–775 (1958).
- 332 31. P. T. Gonzalez-Bellido, T. J. Wardill, M. Juusola, Compound eyes and retinal  
333 information processing in miniature dipteran species match their specific ecological  
334 demands. *Proceedings of the National Academy of Sciences* **108**, 4224–4229 (2011).
- 335 32. O. Faivre, M. Juusola, Visual coding in locust photoreceptors. *Plos One* **3**, e2173 (2008).
- 336 33. M. Wilson, Angular sensitivity of light and dark adapted locust retinula cells. *Journal of*  
337 *Comparative Physiology* **97**, 323–328 (1975).
- 338 34. I. D. Couzin, *et al.*, Uninformed individuals promote democratic consensus in animal  
339 groups. *Science* **334**, 1578–1580 (2011).
- 340 35. D. Biro, D. J. T. Sumpter, J. Meade, T. Guilford, From compromise to leadership in  
341 pigeon homing. *Current Biology* **16**, 2123–2128 (2006).
- 342 36. I. D. Couzin, J. Krause, N. R. Franks, S. A. Levin, Effective leadership and decision-  
343 making in animal groups on the move. *Nature* **433**, 4 (2005).

344

## 345 **Materials and Methods**

346 We construct a simple, spatially-explicit model of neural decision-making to study how the  
347 brain reduces choice in the presence of numerous spatial options (adapted from (15)).  
348 Theoretical predictions obtained were then tested experimentally by exposing invertebrate  
349 (fruit flies and desert locusts) and vertebrate systems (zebrafish) to spatial choice tests in virtual  
350 reality. To identify unifying principles of spatiotemporal computation across scales of  
351 biological organisation, we also reproduce the obtained decision-making patterns with an  
352 established model of collective decision-making in animal groups.

353

354 **Neural decision-making model.** We construct a simple, spatially-explicit model of neural  
355 decision-making that takes directions to different options (potential ‘targets’ in space) as input,  
356 and outputs a vectorial representation (‘activity bump’) of its desired direction of motion (15).  
357 Here, the animal’s brain is characterized by a neural network composed of  $N$  neurons. Each  
358 neuron  $i$  encodes direction to one of the presented goals  $\hat{p}_i$ , and exists in one of two states:  
359  $\sigma_i = 0$  (“not firing”) or  $\sigma_i = 1$  (“firing”). The energy of the system (for any given  
360 configuration) is given by its Hamiltonian,  $H$ .

361 
$$H = -\frac{k}{N} \sum_{i \neq j} J_{ij} \sigma_i \sigma_j$$

362 where,  $k$  is the number of options available to the individual and  $J_{ij}$  is the interaction strength  
363 between neurons  $i$  and  $j$ . Here,  $J_{ij}$  is given by

364 
$$J_{ij} = \cos\left(\pi \left(\frac{|\theta_{ij}|}{\pi}\right)^\nu\right)$$

365 where,  $\theta_{ij}$  is the angle between preferred directions of neurons  $i$  and  $j$ , and  $\nu$  represents the  
366 neural tuning parameter. For  $\nu = 1$ , the interactions become “cosine-shaped”  $J_{ij} = \cos(\theta_{ij})$ ,  
367 and the network has a Euclidean representation of space (Fig. S1). For  $\nu < 1$ , the network has  
368 more local excitation and encodes space in a non-Euclidean manner (Fig. S1). System

369 dynamics are implemented by energy minimization using the Metropolis-Hastings algorithm  
370 (similar to other Ising spin models) and the agent then moves with a velocity  $\vec{V}$  determined by  
371 the normalized sum of goal vectors  $\hat{p}_i$  of all active neurons.

$$372 \quad \vec{V} = \frac{v_0}{N} \sum_{i=1}^N \hat{p}_i \sigma_i$$

373 where  $v_0$  is the proportionality constant. The goal vector  $\hat{p}_i$  now points from the agent's  
374 updated location to the neuron's preferred goal with directional noise chosen from a circularly  
375 wrapped Gaussian distribution centered at 0 with a standard deviation  $\sigma_e$ . As in the mean-field  
376 approximation of the model, the timescale of movement (defined by the typical time to reach  
377 the target) in the numerical simulations was set to be much greater than the timescale of neural  
378 firing (the typical time between two consecutive changes in the neural states  $\sigma_i$ ).

379

380 **Collective decision-making model.** We reproduce results from our neural decision-making  
381 model in a model that describes spatial decision-making at a different scale of biological  
382 organization (refer (36) for methodological details). To highlight the features that are key to  
383 producing the observed bifurcation patterns, we run simulations with and without feedback on  
384 the strength of goal-orientedness of individuals.

385

386 **Fly virtual reality experiments.** All experiments were conducted on 3- to 5-day old female  
387 wild-type CS strain *Drosophila melanogaster* raised at 26°C on a 12 hr light, 12 hr dark cycle.  
388 Experiments were conducted in a flyVR setup procured from loopbio GmbH. 60 tethered  
389 *Drosophila melanogaster* were exposed to either a two-choice or a three-choice decision task  
390 (30 and 30 individuals, respectively) in the virtual reality environment. Each experimental trial  
391 lasted 15 min where flies were exposed to five sets of stimuli—three experimental sets and two  
392 control sets. The experimental stimuli sets consisted of two or three black cylinders (depending

393 on the experimental condition) that were presented to the animal in an otherwise white  
394 environment. A control stimulus with a single pillar was presented before and after the  
395 experimental conditions. We rotated all trajectories such that the  $x$  –axis points from the  
396 origin, to the centre of mass of the targets. To visualise trajectories in the various experimental  
397 conditions, we created time-normalised (proportion of maximum across a sliding time window)  
398 density maps. We then folded the data about the line of symmetry,  $y = 0$  and applied a density  
399 threshold to the time-normalised density map. A piecewise phase transition function was then  
400 fit to quantify the bifurcation.

$$401 \quad y = \begin{cases} 0 & x \leq x_c \\ A|x - x_c|^\alpha & x > x_c \end{cases}$$

402 where  $x_c$  is the critical point,  $\alpha$  is the critical exponent, and  $A$  is the proportionality constant.  
403 We also performed randomisation tests for each bifurcation where we conducted the exact fit  
404 procedure described above to data where the trajectories were randomised by keeping the  $x$ -  
405 coordinates, and swapping the  $y$ -coordinates with values from other random events.  
406 Randomizations show that the resultant fit to our experimental data were highly significant  
407 ( $p < 0.01$  for binary choice and  $p < 10^{-4}$  for the three-choice case).

408  
409 **Locust virtual reality experiments.** All experiments were conducted on 156 instar 5 desert  
410 locusts (57 individuals for two-choice and 99 individuals for three-choice experiments,  
411 respectively) raised in the Animal Research Facility of the University of Konstanz.  
412 Experiments were conducted in a locustVR setup procured from loopbio GmbH. The  
413 experimental procedure was identical to the one described above for flies, except now, each  
414 experimental trial lasted 48 min—three experimental sets (12 min each) and two control sets  
415 (6 min each). Analysing bifurcations in locust trajectories using the same methods described  
416 above showed that the resultant bifurcations fit to our experimental data were highly significant  
417 ( $p < 0.01$  for binary choice and  $p < 10^{-4}$  for the three-choice case).

418

419 **Fish virtual reality experiments.** All experiments were conducted on 1 cm  $\pm$  0.1 cm long  
420 zebrafish of age 24 to 26 days post-fertilisation raised in a room at 28°C on a 16 hr light, 8 hr  
421 dark cycle. 390 fish were tested in total. Of these, 198 fish were exposed to decision-making  
422 with two virtual targets, and 39 fish exposed to decision-making with three virtual targets (see  
423 Supplementary Information for more details). Experiments were conducted in a fishVR setup  
424 procured from loopbio GmbH (refer (24) for details). Once a fish was introduced in the arena,  
425 it was given 20 min to acclimatise to the environment. This was followed by a 10 min control  
426 where it was presented a single virtual conspecific circling the arena in a circle of radius 8 cm.  
427 After this, the real fish was exposed to choice experiments that lasted 90 min with the virtual  
428 fish initialised with random lateral distances between them and random swim direction. To  
429 visualise the bifurcations, we normalised (proportion of maximum) and stacked the marginal  
430 distributions along the direction of the virtual fish's motion for various lateral distances. All  
431 experiments were conducted in accordance with the animal ethics permit approved by  
432 Regierungspräsidium Freiburg, G-17/170.

433

434 **Acknowledgements.** We thank all members of the Department of Collective Behaviour who  
435 assisted with the project: Renaud Bastien for discussions and help setting up the VR  
436 experiments, Guy Amichay for providing control data of two real fish swimming together, and  
437 Paul Szyszka for showing V.H.S. how to tether flies. We thank the 'Itai Cohen Lab' for the  
438 fruit fly image used in Fig. \ref{fig:insects} and Andreas Poehlmann, John Stowers and Max  
439 Hofbauer from loopbio GmbH for technical support with the VR systems. V.H.S., L.L., B.R.S.  
440 and I.D.C. are also grateful to the animal care at the University of Konstanz including Christine  
441 Bauer, Jayme Weglarski and Dominique Leo for help in conducting the experiments. They also  
442 acknowledge the efforts of the scientific and technical staff at the University of Konstanz

443 including Michael Mende, Markus Miller, Mäggi Hieber Ruiz and Daniel Piechowski. V.H.S.  
444 acknowledges the International Max Planck Research School (IMPRS) for Organismal  
445 Biology for the graduate school community and access to courses and resources. I.D.C.  
446 acknowledges support from the NSF (IOS-1355061), the Office of Naval Research grant  
447 (ONR, N00014-19-1-2556), the Struktur- und Innovationsfonds für die Forschung of the State  
448 of Baden-Württemberg, the Deutsche Forschungsgemeinschaft (DFG, German Research  
449 Foundation) under Germany's Excellence Strategy-EXC 2117-422037984 and the Max Planck  
450 Society. N.S.G. is the incumbent of the Lee and William Abramowitz Professorial Chair of  
451 Biophysics and acknowledges support by the Minerva Foundation (grant no. 712601). M.N  
452 acknowledges support from the Hungarian Academy of Sciences (a grant to the MTA-ELTE  
453 'Lendület' Collective Behaviour Research Group, grant number 95152, and MTA-ELTE  
454 Statistical and Biological Research Group) and Eötvös Loránd University.

455

456 **Author contributions.** V.H.S. and I.D.C. designed the study; V.H.S., D.G., T.S., N.S.G. and  
457 I.D.C. constructed the model; D.G. and N.S.G. constructed the mean-field approximation;  
458 V.H.S. and I.D.C. designed the fly experiments; V.H.S. conducted these experiments and  
459 analyzed the data with L.L. and M.N.; V.H.S., B.R.S. and I.D.C. designed the locust  
460 experiments; B.R.S. conducted these experiments and V.H.S. analyzed the data with M.N.;  
461 L.L. and I.D.C. designed the fish experiments; L.L. conducted these experiments and analyzed  
462 this data with V.H.S. and M.N.; V.H.S. and I.D.C. drafted the manuscript with significant  
463 contributions from all authors.

464

465 **Competing interests.** The authors declare that they have no competing interests.

466 **Figures.**



467

468 **Fig. 1.** Geometrical principles of two-choice and three-choice decision-making. (A) Schematic  
 469 of the binary decision-making experiments. This simplified representation shows that a sharp  
 470 transition in the animal’s direction of travel is expected near a critical angle,  $\theta_c$ . (B) A phase  
 471 diagram describing the ‘critical’ transition exhibited while moving from compromise to  
 472 decision between two options in space. The shaded area (also in E) represents the region in  
 473 parameter space where both the compromise, and the decision solutions exist. (C) Density plot  
 474 showing trajectories predicted by the neural model in a two-choice context. The axes represent  
 475  $x$  – and  $y$  –coordinates in Euclidean space. The black line (also in G) presents a piecewise  
 476 phase-transition function fit to the bifurcation. (D) Schematic of three-choice decision-making  
 477 experiments, where the central target is on the angle bisector of the angle subtended by the  
 478 other two targets. (E) A phase diagram describing the first ‘critical’ transition when the  
 479 individual chooses among three options. Once the individual eliminates one of the outermost  
 480 targets, it can decide between the two remaining options, similar to the two-choice phase  
 481 diagram described in B. (F) Theoretical predictions for decision-making in a three-choice  
 482 context. The dashed line (also in H) is the bisector of the angle subtended by center target and  
 483 the corresponding side target on the first bifurcation point. See Table S1 for parameters used

484 in C and F. (G) and (H) Density plots from experiments conducted with flies and locusts

485 choosing among two and three options, respectively.

486



487

488 **Fig. 2.** Decision-making for a larger number of targets. Density plots of simulated trajectories  
489 for four- (A), five- (B), six- (C) and seven-choice (D) decision-making when targets are placed  
490 equidistant and equiangular from the agent. These axes represent  $x$  – and  $y$  –coordinates in  
491 Euclidean space. Geometrical configurations are also varied to place the targets on the same  
492 side of the agent (A and B) or in radial symmetry (C and D). See Table S1 for parameters used  
493 in A–C. In D, all parameters used are identical except the system size  $N = 70$ .



494

495 **Fig. 3.** Decision-making in a moving frame-of-reference. (A) Schematic of the two-choice  
496 decision-making experiments conducted with larval zebrafish. In these experiments (also in the  
497 three-choice experiments depicted in D), the virtual fish swim parallel to each other while  
498 maintaining a fixed lateral distance,  $L$  between them. We only consider data where the real fish  
499 swims behind the virtual fish, i.e., it follows the virtual fish (see SI Appendix and Fig. S13 for  
500 details). (B) Normalized probability distribution (proportion of maximum) of simulated  
501 positions of an agent following two moving targets, and corresponding experiments (C)  
502 conducted with larval zebrafish following two virtual conspecifics. (D) Schematic  
503 representation of the three-choice decision-making experiments. (E) Normalized probability  
504 distributions of simulated positions of an agent following three moving targets, and  
505 corresponding experiments (F) conducted with larval zebrafish following three virtual  
506 conspecifics. See Table S1 for model parameters used in B and E.

507



508

509 **Fig. 4.** Consensus decision-making in simulations of animal groups follow the same  
510 geometrical principles. Results for two- (A) and three-choice (B) decision-making in a model  
511 of animal collectives. The density plots show trajectories adopted by the centroid of the animal  
512 group for 500 replicate simulations where the groups don't split. The axes represent  $x$  – and  
513  $y$  –coordinates in Euclidean space. The black lines show a piecewise phase-transition function  
514 fit to the trajectories. For the three-choice case (B), the dashed line is the bisector of the angle  
515 subtended by center target and the corresponding side target on the first bifurcation point. See  
516 Table S2 for parameters used.
