# Supplementary material for: The geometry of decision-making
Source: bioRxiv or medRxiv preprint supplement (doi:10.1101/2021.05.26.445795), 2021-10-25
Supplement: Supplementary file [file media-1.pdf]

## 11 Materials and Methods

### 12 1. Neural decision-making model

13 **1.1 Overview.** We construct a spatially-explicit computational model of neural decision-making that takes in directions to  
14 the different targets as input, and outputs a vectorial representation of the agent’s future velocity (adapted from (1)). This  
15 provides us explicit predictions for animal trajectories, allows us to determine which target is reached in each realization of  
16 the simulation, and facilitates direct comparison with experimental tests. The model takes inspiration from the neuroscience  
17 literature (2–5), but is a deliberate simplification intended to reveal features that are essential to produce bifurcations in the  
18 agent’s trajectories (Fig. S2).

19 **1.2 Framework.** Here, the brain is characterized by a recurrent neural network composed of  $N$  neurons. Each neuron  $i$  encodes  
20 direction to one of the presented goals  $\hat{p}_i$ , and exists in one of two states:  $\sigma_i = 0$  (“not firing”) or  $\sigma_i = 1$  (“firing”). Note that  
21 each “neuron” here can be conceived as being a single neuron or a collection of neurons and their combined firing for any goal  
22 represents neural activity encoding that target. Since each neuron exists in one of two states, there are  $2^N$  possible system  
23 configurations. Energy of the system (for any given configuration) is given by its Hamiltonian,  $H$ .

$$H = -\frac{k}{N} \sum_{i \neq j} J_{ij} \sigma_i \sigma_j \quad [1]$$

where,  $k$  is the number of options available to the animal and  $J_{ij}$  is the interaction strength between neurons  $i$  and  $j$ . A  
positive  $J_{ij}$  indicates an excitatory interaction between neuron  $i$  and neuron  $j$  while a negative  $J_{ij}$  indicates an inhibitory  
interaction. Here, we assume that neural interactions are excitatory when neurons encode a similar directional preference, and  
inhibitory when they encode conflicting directional preferences. This captures both explicit ring-attractor networks, with local  
excitation and long-range/global inhibition (as found in fruit flies, and other insects (4)), and computation among distributed  
competing neural groups (as in the mammalian brain (3)). The locality of excitatory interactions encoded by  $J_{ij}$ , or directional  
tuning of the neurons is given by the tuning parameter  $\nu$ . Here,  $J_{ij}$  is given by

$$J_{ij} = \cos \left( \pi \left( \frac{|\theta_{ij}|}{\pi} \right)^\nu \right) \quad [2]$$

where,  $\theta_{ij}$  is the angle between preferred directions of neurons  $i$  and  $j$ , and  $\nu$  represents the neural tuning parameter. For  $\nu = 1$ ,  
the interactions become “cosine-shaped”  $J_{ij} = \cos(\theta_{ij})$ , and the network has a Euclidean representation of space (Fig. S1). For  
 $\nu < 1$ , the network has more local excitation and encodes space in a non-Euclidean manner (Fig. S1). For sake of simplicity,  
we assume a fully-connected network. At each timestep, energy of the system  $H$  is minimized using the Metropolis-Hastings  
algorithm i.e. a change in neural state  $\sigma_i$  is dependent on the change of energy ( $\Delta H$ ) that accompanies it.

$$P_{1 \rightarrow 0/0 \rightarrow 1}^{(i)} = \begin{cases} \exp(-\Delta H/T) & \Delta H \leq 0 \\ 1 & \Delta H > 0 \end{cases} \quad [3]$$

where  $P_{1 \rightarrow 0/0 \rightarrow 1}^{(i)}$  is the probability that a neuron switches its state and  $\Delta H = H_2 - H_1$  where  $H_1$  is the energy of the system  
before the neuron changes its state and  $H_2$  is its energy after the change in state. This is akin to other Ising spin models where  
the temperature parameter  $T$  is interpreted here as neural noise. The agent then moves with a velocity  $\vec{V}$  determined by the  
normalized sum of goal vectors  $\hat{p}_i$  of all active neurons.

$$\vec{V} = \frac{v_0}{N} \sum_{i=1}^N \hat{p}_i \sigma_i \quad [4]$$

where  $v_0$  is the proportionality constant. The agent moves along  $\vec{V}$  and neurons update their goal vector  $\hat{p}_i$  to reflect the agent’s  
movement. The goal vector  $\hat{p}_i$  now points from the agent’s updated location to the neuron’s preferred goal with directional  
noise chosen from a circularly wrapped Gaussian distribution centered at 0 with a standard deviation  $\sigma_e$ .

24 **1.3 Simulations.** We simulated an agent with sixty neurons that is tasked with decision-making in an environment containing  
25 multiple (two–seven) targets (using seventy neurons for the seven target case). Each neuron was assigned a preference for one  
26 of the available targets which determined its goal vector  $\hat{p}_i$ . For each simulation run, the agent was reinitialized at (0, 0) and  
27 the targets were set at a distance of 5 units, corresponding to 5 m in the fly experiments. In the two-target case, the targets  
28 were separated by 60° putting them at (4.33, -2.5) and (4.33, 2.5) respectively. In the three-target case, successive targets were  
29 initialized to be 40° apart putting them at (3.83, -3.21), (5, 0) and (3.83, 3.21) respectively. We ran 500 replicate simulations  
30 for each condition.

31 To demonstrate sensitivity of this algorithm, we examine the effect of varying the proportion of neurons pointing to a target,  
32 on the probability that it is chosen (Fig. S3D and E). The slope of the sigmoid here indicates how a small change in the

33 proportion of neurons encoding a target is amplified to maximize decision accuracy. We also vary the agent’s starting position,  
34 distance to the target, and the neural tuning  $\nu$  to illustrate the effect these parameters on the bifurcation angle (Fig. S3A-C).

35 Finally, we also simulate a scenario where the agent is restricted in motion only allowing movement in the direction  
36 perpendicular to direction to the targets. These simulations are meant to mimic a social decision-making scenario where the  
37 animal chooses to follow one of several moving conspecifics at a fixed distance behind them (see Fig. 3 in main text). Once  
38 again, the agent was initialized at  $(0, 0)$  while the targets were placed at a fixed distance  $d$  along the  $x$ -axis. We varied lateral  
39 distance between the targets such that their centroid was always at  $(d, 0)$  and recorded the agent’s trajectory along the  $y$ -axis.  
40 Corresponding experiments were conducted with larval zebrafish (see Section 5 for experimental details).

41 **1.4 Parameter choice.** Our model is composed of two ‘free’ parameters, the neural noise parameter ( $T$ ) and the neural tuning  
42 parameter ( $\nu$ ). Here, we will discuss the values chosen for these parameters and their biological interpretation.

43 **1.4.1 Neural noise.** The neural noise parameter  $T$  represents the spontaneous firing rate of neurons in the brain. From the phase  
44 diagrams (see Fig. 1 in main text), it is evident that the animal will spontaneously transition from averaging direction to all  
45 available options, to eliminating one among the remaining options, so long as the brain is poised below a critical level of noise,  
46  $T < T_c$  (Fig. 1, B and E in main text and Fig. S7, A and C). Here, we will address behavior of the system when  $T > T_c$  for  
47 decision-making in both the two- and the three-choice case. In the two-choice case, the agent consistently moves towards the  
48 average of the two target directions. However, any movement in the direction perpendicular to this can be described by a  
49 diffusive process (Fig. S7B). For the three-choice case, we observe that when  $T$  exceeds  $T_c$ , geometrical relationship between  
50 options creates a strong bias towards central targets (Fig. S7D). This prevents the animal from exploring the different targets  
51 (of equal value) with a similar frequency—as is indicated by our experimental data where ratio of visiting a side target to  
52 visiting the center target is 0.82 for flies and 1.23 for locusts (this ratio would be 1 if all targets were visited equally). Thus, in  
53 order to maximize decision-accuracy in the presence of an arbitrary number of targets, biological systems (brains) must be  
54 poised below a critical level of neural noise, i.e.  $T$  must be less than  $T_c$ .

55 **1.4.2 Neural tuning.** The bifurcation angle  $\theta_c$  increases monotonically with the neural tuning parameter,  $\nu$  (Fig. S3C). Thus,  
56 increasing  $\nu$  inevitably increases travel distance, and hence, the time to decision. Hence, for decisions where time to decision is  
57 critical, organisms require the neurons in the decision-making ensemble to be highly tuned. However, very high directional  
58 tuning (low values of  $\nu$ ) is also detrimental to the animal as this eliminates all options, except one, making the animal less  
59 sensitive to information that may be acquired as the animal approaches the targets. Thus, we expect the extent of neural  
60 tuning, together with neural noise, to represent a trade-off between decision-speed and accuracy.

61 **1.5 Calculating susceptibility.** Susceptibility is a key concept in physics and mathematics, from statistical mechanics to dynamical  
62 systems theory. It quantifies the change of a system’s state in response to change in some external field. The reason physicists  
63 and mathematicians are interested in the quantity is because it exhibits a sharp increase when a complex system approaches  
64 a critical phase transition and is hence, predictive of the system being close to a tipping point (6, 7). For decision-making  
65 systems, susceptibility represents increased sensitivity of the system to small differences between the targets, making a rise  
66 in susceptibility highly desirable. Here, we show that the brain breaks down multi-choice decisions to a series of binary  
67 decisions, each of which is marked by a bifurcation, inevitably causing a peak in susceptibility. We measure susceptibility as  
68 the directional deviation of the agent given one extra neuron that fires for one of the targets (making it  $\sim 2\%$  more attractive).  
69 To do this we simulate a decision-making agent that at each timestep, outputs a desired direction of movement (following the  
70 exact procedure described above). Additionally, we introduce a second neural network composed of one extra neuron encoding  
71 one of the targets, that at each timestep reaches equilibrium through iterative collective dynamics (here, for 1000 timesteps)  
72 and computes a second desired direction of movement. Susceptibility at the agent’s current location is then measured as the  
73 difference in the agent’s direction of travel output by the two networks (representing sensitivity to the presence of an extra  
74 neuron in the second network). As expected, we observe a peak in susceptibility close to the bifurcation point. Quantifying the  
75 agent’s decision accuracy reveals that the system is able to amplify such small differences and the agent almost always chooses  
76 the ‘correct’ target (Fig. S3, D and E).

77 **1.6 Spatial asymmetry in target locations.** In the above model formulation, neurons encode target locations, and attractiveness  
78 of a target is encoded in the proportion of neurons that point to that target. This formulation fails to encapsulate certain  
79 spatial geometries. For example, when two targets are in directional proximity while a third target is directionally distant from  
80 the agent’s egocentric perspective. Since neurons encode directions to targets, and two of the three targets are in directional  
81 proximity, the agent always goes to one of these targets (Fig. S8). Previous work in fruit-flies suggests that this is not true  
82 and that animals will lump directionally similar targets and consider them as a single target; that they will still visit an  
83 equally attractive, but directionally distant target (8). To account for this, we incorporate an ‘overlap’ function in our model  
84 implementation. This function reduces effective size of the decision-making ensemble by discounting a proportion of neurons  
85 encoding a target if there are other targets in directional proximity. Biologically, this can be seen as saturation of neurons that  
86 encode that direction. Here, each neuron encodes direction to its preferred target with a Gaussian error,  $\varepsilon_i$  centered around the  
87 direction to the target.

$$\varepsilon = \mathcal{N}(0, \sigma^2) \quad [5]$$

where,  $\sigma^2$  is the variance of the error distribution. Neurons are then discounted from network depending on their deviation from their preferred target relative to their deviation from direction to other targets. Probability that neuron  $i$  is still considered, or probability that it is not discounted  $c_i$  is given by

$$c_i = \frac{f(\theta_{ij})}{\sum_j f(\theta_{ij})} \quad [6]$$

where,  $f(\theta_{ij})$  is the probability density at  $\theta_{ij}$  from a normal distribution  $N(0, \sigma^2)$  and  $\theta_{ij}$  is the deviation in the preferred direction of neuron  $i$  from the centre of target  $j$ . Effectively, a discounted neuron in the decision-making ensemble and a neuron that does not fire i.e.  $\sigma_i = 0$  are treated identically. Fig. S4 shows results from a model with and without implementation of the ‘overlap’ function for symmetric setups (an illustration of including gaussian error in the directional vectors), while Fig. S8 shows these results in an asymmetric setup as discussed above.

**1.7 Mean-field approximation.** Here, we present a mean-field approximation of the neural decision-making model described above. The neural model largely draws inspiration from spin models used in physics, primarily to explain magnetism (1, 9). As analogy, neural activity here akin to spins in these models, excitatory neural interactions are described as being ferromagnetic and inhibitory interactions as antiferromagnetic. We will henceforth refer to our system in the biological context of an animal making spatial decisions, but it is worth noting that derivation of the analytical equations largely come from the physical spin system.

In our model the  $N$  neurons are divided into  $k$  equal groups  $G_i (i = 1, \dots, k)$ , where  $k$  is the number of options (potential targets in space) available to the animal. The fraction of the total number of neurons that are in a firing state towards  $\hat{p}_i$  is given by

$$n_i = \frac{1}{N} \sum_{j \in G_i} \sigma_j \quad [7]$$

Then we can rewrite equation [4] in the following way

$$\vec{V} = v_0 \sum_{i=1}^k \hat{p}_i n_i \quad [8]$$

The rule by which a neuron switches its state from not firing ( $\sigma_i = 0$ ) to firing ( $\sigma_i = 1$ ) is constructed such that the neuron is more likely to fire if the animal is already moving in that direction. This can be expressed by Glauber dynamics (10).

$$r_{1 \rightarrow 0}^{(i)} = \frac{r_0}{1 + \exp\left(\frac{2k\vec{V} \cdot \hat{p}_i}{T}\right)} \quad r_{0 \rightarrow 1}^{(i)} = \frac{r_0}{1 + \exp\left(-\frac{2k\vec{V} \cdot \hat{p}_i}{T}\right)} \quad [9]$$

where  $r_{1 \rightarrow 0}^{(i)}$  is the rate in which a neuron in group  $G_i$  changes from “firing” state to “not firing” and  $r_{0 \rightarrow 1}^{(i)}$  is the rate of the opposite transition, from “not firing” to “firing”.  $r_0$  is a constant rate which we set to one. The model also includes noise in the neural system i.e. the rate at which neurons will fire or turn off spontaneously independent of the collective dynamics involved. In spin systems, this is analogous to the temperature parameter that introduces randomness in the spin-flipping dynamics. Then the equations of motion (master equation) in the limit of  $N \gg 1$  are

$$\frac{dn_i}{dt} = \frac{\frac{1}{k} - n_i}{1 + \exp\left(-\frac{2k\vec{V} \cdot \hat{p}_i}{T}\right)} - \frac{n_i}{1 + \exp\left(\frac{2k\vec{V} \cdot \hat{p}_i}{T}\right)} \quad [10]$$

We rearrange the above equation [10] to get

$$\frac{dn_i}{dt} = \frac{1}{k \left( 1 + \exp \left( -\frac{2k\vec{V}\cdot\hat{p}_i}{T} \right) \right)} - n_i \quad [11]$$

101 The steady state solution of this equation can be written as the solution of the following system of algebraic equations

$$n_i = \frac{1}{k \left( 1 + \exp \left( -\frac{2k\vec{V}\cdot\hat{p}_i}{T} \right) \right)} \quad i = 1, 2, \dots, k \quad [12]$$

102 The system of equations that including  $k$  equations [12] and the 2 equations [8] in 2D is our basic system that gives us as its  
 103 solution the velocity  $\vec{V}$  and the fraction of active neurons in each group  $n_i$  at steady state. We will henceforth refer to this  
 104 system as the “model equations”.

105 When the targets are at infinity, the angles between the targets are constant, and the Hamiltonian is time-independent and  
 106 describes a system in equilibrium. We now examine the simplest case of two targets at infinity, i.e. where  $k = 2$  and  $\hat{p}_1$  and  $\hat{p}_2$   
 107 are fixed. In this case, there exists a symmetric solution that describes a compromise between the two targets.

$$\vec{V} = V \left( \frac{\hat{p}_1 + \hat{p}_2}{2} \right) \quad [13]$$

108 Substituting equation [10] into equation [8] gives the following algebraic equation:

$$V = \frac{1}{1 + \exp \left( -\frac{2V(1+\cos\theta)}{T} \right)} \quad [14]$$

which always has a solution for ( $0 < \theta < \pi$ ;  $0 < T < 1$ ). In the three-choice case ( $k = 3$ ), we get a similar compromise solution when the targets are radially symmetric,  $\hat{p}_1 \cdot \hat{p}_2 = \hat{p}_3 \cdot \hat{p}_3$ .

109 When the angle is large enough ( $\theta > \theta_c$ ) and the temperature is low enough ( $T < T_c$ ), there exists a second non-symmetric  
 110 solution to the model equations that we term “decision” as it describes breaking the compromise between the targets and  
 111 change in the direction of movement. The curve in the phase diagram where the second solution appears is called “binodal  
 112 curve” or “coexistence curve” (represented by the dashed line; see Fig. 1B and E in main text). For larger angles, the symmetric  
 113 solution becomes unstable. In the phase diagram this instability happens at the “spinodal curve” (represented by the solid line;  
 114 see Fig. 1B and E in main text). Between the two curves we have the metastable region where both the compromise and  
 115 decision are possible, and we expect a transition between them in a form of a bifurcation of the compromise solution. This is a  
 116 typical hysteresis region of first order phase transition that at higher temperatures becomes second order. The transition to a  
 117 second order phase transition happens at the tri-critical point where the coexistence and spinodal curves coincide into the  
 118 second order phase transition curve (above the tri-critical point). In the case of three targets, we have at the first bifurcation  
 119 point a phase transition between two different compromise solutions—for small angles we have a compromise between all three  
 120 directions to the targets while for large angles we have a compromise between two of the three targets. Thus, the symmetry is  
 121 broken sequentially.

122 Let us now find the criterion for instability of a general solution of the model equations. The dynamical equation for the  
 123 velocity can be obtained using equations [8] and [11].

$$\frac{d\vec{V}}{dt} = \sum_{i=1}^k \frac{dn_i}{dt} \hat{p}_i = \sum_{i=1}^k \frac{1}{k \left( 1 + \exp \left( -\frac{2k\vec{V}\cdot\hat{p}_i}{T} \right) \right)} \hat{p}_i - \vec{V} \quad [15]$$

124 Let  $\vec{V} = \vec{V}_0$  be a solution of the model equations and consider a small perturbation to the velocity in the perpendicular  
 125 direction to the velocity  $\vec{V}_0$ .

$$\vec{V} = \vec{V}_0 + \epsilon \hat{n}^0 \quad [16]$$



126 where,  $\hat{n}^0$  is the normal to  $\vec{V}_0$ . Substituting into equation [15], expanding to first order in  $\epsilon$  and taking the normal component,  
 127 we get the following equation for the perturbation  $\epsilon$ .

$$\frac{d\epsilon}{dt} = -A\epsilon + \mathcal{O}(\epsilon^2) \quad [17]$$

where

$$A \equiv 1 - \frac{1}{2T} \sum_{i=1}^k \operatorname{sech}^2 \left( \frac{k\vec{V}_0 \cdot \hat{p}_i}{T} \right) (\hat{n}^0 \cdot \hat{p}_i)^2 \quad [18]$$

128 Therefore, the solution  $\vec{V} = \vec{V}_0$  is stable if  $A > 0$  and unstable if  $A < 0$ . Hence, the curve  $A = 0$  for the compromise solution is  
 129 the spinodal curve.

130 **1.7.1 Susceptibility.** Susceptibility is defined as the response of the order parameter of a system to an external field (11). In this  
 131 model, a bias towards one of the targets is equivalent to application of an external field in models of spin interactions (1). The  
 132 order parameter in our model is the velocity component normal to the individual's previous direction of movement. Here, we  
 133 examine its response to introduction of a small imbalance in the normal direction. Let us denote a small asymmetry in one of  
 134 the neural groups as  $\alpha$ . Without loss of generality we take the first neural group  $G_1$  (assuming  $\hat{n}^0 \cdot \hat{p}_i \neq 0$ ). Then the velocity  
 135 can be written as

$$\vec{V} = \sum_{i=1}^k \frac{1}{k \left( 1 + \exp \left( -\frac{2k\vec{V} \cdot \hat{p}_i}{T} \right) \right)} \hat{p}_i + \alpha \hat{p}_1 \quad [19]$$

136 When we decompose the velocity to the initial velocity and the small perturbation  $v_n$  in the normal direction  $\hat{n}^0$

$$\vec{V} = \vec{V}_0 + v_n \hat{n}^0 \quad [20]$$

in which case, the susceptibility  $\chi$  (at constant temperature) is given by

$$\chi = \left. \frac{d(\vec{V} \cdot \hat{n}^0)}{d\alpha} \right|_{v_n=0, T=\text{const.}} \quad [21]$$

137 We substitute the decomposition equation [20] into the normal component of equation [19].

$$\vec{V} \cdot \hat{n}^0 = \frac{1}{k} \sum_{i=1}^k \frac{1}{1 + \exp \left( \frac{-2k\vec{V}_0 \cdot \hat{p}_i - 2kv_n(\hat{p}_i \cdot \hat{n}^0)}{T} \right)} \hat{p}_i \cdot \hat{n}^0 + \alpha \hat{p}_1 \cdot \hat{n}^0 \quad [22]$$

138 Taking the derivative at  $v_n = 0$  yields

$$d(\vec{V} \cdot \hat{n}^0) = \frac{1}{2T} \sum_{i=1}^k \operatorname{sech}^2 \left( \frac{k\vec{V}_0 \cdot \hat{p}_i}{T} \right) (\hat{n}^0 \cdot \hat{p}_i)^2 dv_n + (\hat{p}_1 \cdot \hat{n}^0) d\alpha \quad [23]$$

139 Using the definition from equation [18] and the fact that  $d(\vec{V} \cdot \hat{n}^0) = dv_n$ , we can write the susceptibility as

$$\chi = \frac{\hat{p}_1 \cdot \hat{n}^0}{A} \quad [24]$$

140 Thus, susceptibility diverges when  $A \rightarrow 0$ , i.e. on the spinodal curve (see Fig. S5). Based on this analysis, we arrive at  
 141 the conclusion that maximal susceptibility is obtained when the bifurcation occurs at the highest possible angle—as late as  
 142 possible from the perspective of an animal approaching the different spatial targets.

143 **1.7.2 Short-time response function.** Let us consider that our system of  $N$  neurons is in the averaging/compromise regime. Since  
 144 the order parameter of the system is the velocity component in the direction normal to the movement direction, we will denote  
 145 it by  $V_n$ , so that a change in the direction of the movement will be a result of  $V_n \neq 0$ . At  $t = 0$ , we add a single neuron that  
 146 encodes direction to one of the targets, say  $\hat{p}_1$ . The short time response of the system is defined here as the response of the  
 147 system as manifested in a change of the order parameter  $V_n$  in a very short time, so short that it allows for only one neuron  
 148 to switch states. In other words we are looking for a change  $\delta V_n$  over the firing time of a single neuron  $\delta t$  as a result of bias  
 149 introduced by the additional neuron. In doing this, we generalize a similar calculation that appeared for a one dimensional spin  
 150 model in (9).

151 From equation [8], we see that the change in state of a single neuron that encodes target  $i$  (pointing towards  $\hat{p}_i$  direction)  
 152 makes the following change in the normal component of the velocity vector.

$$\Delta V_n = \frac{\hat{p}_i \cdot \hat{n}}{N} \quad [25]$$

153 First, we consider a simple limit  $T \rightarrow \infty$  where there is no response. The probability of a neuron in the group  $i$  to be in the  
 154 firing state ( $\sigma_i = 1$ ) is given by

$$P = \frac{r_{0 \rightarrow 1}^{(i)}}{r_{0 \rightarrow 1}^{(i)} + r_{1 \rightarrow 0}^{(i)}} = \frac{1}{1 + \exp\left(-\frac{2k\vec{V} \cdot \hat{p}_i}{T}\right)} \quad [26]$$

which in the limit  $T \rightarrow \infty$  gives  $1/2$ . We add a single neuron that encodes direction to the target pointing towards  $\hat{p}_1$ .  
 Therefore it contributes to  $V_n$  according to equation [25]. In order to find the contribution of the rest of the neurons in the  
 decision-making ensemble, we have to multiply the probability that each neuron fires (which is  $1/2$  without response) by the  
 number of neurons in the group and the contribution of one active neuron according to equation [25]. We therefore get

$$V_n = \sum_{i=1}^k \frac{1}{2} \cdot \frac{N}{k} \cdot \frac{\hat{p}_i \cdot \hat{n}}{N} + \frac{\hat{p}_1 \cdot \hat{n}}{N} = \frac{1}{2k} \sum_{i=1}^k (\hat{p}_i \cdot \hat{n}) + \frac{1}{N} (\hat{p}_1 \cdot \hat{n}) \quad [27]$$

155 When the targets are symmetric with respect to the direction of movement, the first term in equation [27] vanishes, and we  
 156 get

$$V_n = \frac{\sin(\frac{\theta}{2})}{N} \quad [28]$$

where  $\theta$  is the angle between the targets in the case of two targets, and the angle between the leftmost and the rightmost  
 targets in the case of three targets.

157 Now let us return to the response of a single neuron over time  $t$ . At  $t = 0$ , we introduced an additional neuron that encodes  
 158 direction  $\hat{p}_1$ . Prior to any response, equation [27] gives the expression for  $V_n$ . We can write the contributions of the change in  
 159 state of all neurons in the ensemble in the following way which gives us the response of the system.

$$\delta V_n = \frac{1}{2} \cdot \frac{N}{k} \sum_{i=1}^k r_{0 \rightarrow 1}^{(i)} \frac{\hat{p}_i \cdot \hat{n}}{N} \delta t - \frac{1}{2} \cdot \frac{N}{k} \sum_{i=1}^k r_{1 \rightarrow 0}^{(i)} \frac{\hat{p}_i \cdot \hat{n}}{N} \delta t + \frac{\hat{p}_1 \cdot \hat{n}}{N} \delta t \quad [29]$$

160 Substituting the rates from equations [9], we get

$$\delta V_n = \sum_{i=1}^k \frac{\hat{p}_i \cdot \hat{n}}{2k} \tanh\left(\frac{k\vec{V}(0) \cdot \hat{p}_i}{T}\right) \delta t + \frac{\hat{p}_1 \cdot \hat{n}}{N} \delta t \quad [30]$$

161 Let us assume that we start from the symmetric compromise solution for  $t < 0$ , so that  $V_n = 0$ , and thus at  $t = 0$ ,  $V_n$  is  
 162 still small. Then we can look at it as a small perturbation of  $\vec{V}(0)$  according to equation [19], and obtain to first order in the  
 163 perturbation  $v_n$

$$\frac{\delta V_n}{\delta t} = \sum_{i=1}^k \frac{\hat{p}_i \cdot \hat{n}_0}{2k} \tanh \left( \frac{k\vec{V}_0 \cdot \hat{p}_i}{T} \right) + v_n(1-A) + \frac{\hat{p}_1 \cdot \hat{n}_0}{N} \quad [31]$$

where  $A$  is given in equation [18]. Since  $A \geq 0$  for stable solutions, from the structure of the equation [31] we see that the response is maximal when  $A = 0$ , namely at the spinodal on the verge of instability (see Fig. S5).

164 Since there is no response yet at  $t = 0$ , we can substitute for  $v_n$  the expression from equation [27]. Then for two and for  
165 three symmetric targets, we get

$$\frac{\delta V_n}{\delta t} = \frac{\sin \frac{\theta}{2}}{N} \left[ 1 + \frac{\sin^2 \frac{\theta}{2}}{2T} \operatorname{sech}^2 \left( \frac{2V_0 \cos \frac{\theta}{2}}{T} \right) \right] \quad [32]$$

and

$$\frac{\delta V_n}{\delta t} = \frac{\sin \frac{\theta}{2}}{N} \left[ 1 + \frac{\sin^2 \frac{\theta}{2}}{T} \operatorname{sech}^2 \left( \frac{3V_0 \cos \frac{\theta}{2}}{T} \right) \right] \quad [33]$$

respectively.

166 Now let us look at response due to the same bias that is introduced at  $t = 0$ , but  $V_n(t < 0) \neq 0$  as it is essential in order to  
167 calculate the response function after the first bifurcation. In this case,  $V_n$  is not small and there is a response for  $t < 0$ . We  
168 can add the additional neuron that encodes direction  $\hat{p}_1$  in the following way

$$\vec{V}(t = 0) = \vec{V}(t < 0) + \frac{\hat{p}_1 \cdot \hat{n}}{N} \hat{n} \quad [34]$$

where we denote  $\vec{V}(t < 0) = \vec{V}_0$ . We can write the response to this additional neuron at  $t = 0$  over the very short time  $\delta t$  in the following schematic form

$$\delta V_n = \sum_{i=1}^k \frac{\hat{p}_i \cdot \hat{n}}{N} (P_{i,0 \rightarrow 1}^{(1)} - P_{i,1 \rightarrow 0}^{(1)}) \delta t + \frac{\hat{p}_1 \cdot \hat{n}}{N} \delta t \quad [35]$$

where  $P_{i,0 \rightarrow 1}^{(1)}$  is the firing probability of an inactive neuron in group  $G_i$  as a response to bias introduced by the additional neuron that encodes direction  $\hat{p}_1$ , and  $P_{i,1 \rightarrow 0}^{(1)}$  is the probability that a firing neuron in group  $G_i$  turns off as a response to bias introduced by the additional neuron.

$$\begin{aligned} P_{i,0 \rightarrow 1}^{(1)} &= \frac{N}{k} r_{1 \rightarrow 0}^{(i)}(t < 0) r_{0 \rightarrow 1}^{(i)}(t = 0) \\ P_{i,1 \rightarrow 0}^{(1)} &= \frac{N}{k} r_{0 \rightarrow 1}^{(i)}(t < 0) r_{1 \rightarrow 0}^{(i)}(t = 0) \end{aligned} \quad [36]$$

where

$N/k$  is the number of spins in group  $i$ ,

$P_{1 \rightarrow 0}^{(i)}(t < 0) = \frac{1}{1 + \exp\left(\frac{2k\vec{V}_0 \cdot \hat{p}_i}{T}\right)}$  is the probability of having a non-firing neuron at  $t < 0$  in group  $G_i$ ,

$P_{0 \rightarrow 1}^{(i)}(t < 0) = \frac{1}{1 + \exp\left(-\frac{2k\vec{V}_0 \cdot \hat{p}_i}{T}\right)}$  is the probability of having a firing neuron at  $t < 0$  in group  $G_i$ ,

$P_{1 \rightarrow 0}^{(i)}(t = 0) = \frac{1}{1 + \exp\left(\frac{2k\vec{V}(t=0) \cdot \hat{p}_i}{T}\right)}$  is the probability of a neuron to stop firing at  $t = 0$  in group  $G_i$ ,

$P_{0 \rightarrow 1}^{(i)}(t = 0) = \frac{1}{1 + \exp\left(-\frac{2k\vec{V}(t=0) \cdot \hat{p}_i}{T}\right)}$  is the probability of a neuron to start firing at  $t = 0$  in group  $G_i$ ,

$P_{1 \rightarrow 0}^{(i)}(t < 0) r_{0 \rightarrow 1}^{(i)}(t = 0)$  is the probability of having a non-firing neuron at  $t < 0$  in group  $G_i$ , that starts firing at  $t = 0$ ,

$P_{0 \rightarrow 1}^{(i)}(t < 0) r_{1 \rightarrow 0}^{(i)}(t = 0)$  is the probability of having a firing neuron at  $t < 0$  in group  $G_i$ , that stops firing at  $t = 0$ .

169 Substituting equation [34] into equation [35] and taking the limit of large  $N(N \gg k)$ , we get

$$\begin{aligned}
\delta V_n &= \sum_{i=1}^k \frac{\hat{p}_i \cdot \hat{n}}{N} \cdot \frac{N}{4k} \operatorname{sech}^2 \left( \frac{k\vec{V}_0 \cdot \hat{p}_i}{T} \right) \left[ 1 + \frac{2k(\hat{p}_1 \cdot \hat{n})(\hat{p}_i \cdot \hat{n})}{NT \left( 1 + \exp \left( \frac{2k\vec{V}_0 \cdot \hat{p}_i}{T} \right) \right)} \right] \delta t \\
&\quad - \frac{\hat{p}_i \cdot \hat{n}}{N} \cdot \frac{N}{4k} \operatorname{sech}^2 \left( \frac{k\vec{V}_0 \cdot \hat{p}_i}{T} \right) \left[ 1 - \frac{2k \exp \left( \frac{2k\vec{V}_0 \cdot \hat{p}_i}{T} \right) (\hat{p}_1 \cdot \hat{n})(\hat{p}_i \cdot \hat{n})}{NT \left( 1 + \exp \left( \frac{2k\vec{V}_0 \cdot \hat{p}_i}{T} \right) \right)} \right] \delta t + \frac{\hat{p}_1 \cdot \hat{n}}{N} \delta t \\
&= \frac{\hat{p}_1 \cdot \hat{n}}{N} (2 - A) \delta t
\end{aligned} \tag{37}$$

where  $A$  is given by equation [18]. Also in this case we see that the response is maximal when  $A = 0$ , namely at the spinodal on the verge of instability (see Fig. S5).

170 **1.7.3 Trajectories.** We use the same model equations for a time-dependent Hamiltonian form [1] and consider them at every  
171 position to calculate trajectories for a system with targets at a finite distance (see Fig. S5 for trajectories obtained from the  
172 mean-field approximation and Fig. S6 for comparison with simulations of smaller system sizes).

173 All results of this section can be generalized to any value of the neural tuning parameter by replacing the cosines of the  
174 scalar products between the directions  $\hat{p}_i$  by the expression given in equation [2].

## 175 2. Collective decision-making model for animal groups

176 **2.1 Overview.** The bifurcation pattern described above for binary decision-making is reminiscent of work on collective decision-  
177 making in bird flocks (12), fish schools (13) and baboon troops (14). We expose an established model of consensus decision-making  
178 in animal groups (14) to a multi-choice decision scenario. As suspected, the model predicts that animal groups, like the  
179 brain, will break multi-choice decisions to a series of binary decisions (see Fig. 4 in main text). Thus, our results may be  
180 broadly applicable across scales of biological organization—neural ensembles and animal collectives. At both these scales,  
181 decision-making can be conceived as a consensus paradigm among elements that compose the system—consensus among  
182 neurons at the individual level and among individuals at the group level.

183 **2.2 Framework.** Groups are composed of  $N$  individuals, each characterised by a position vector  $c_i(t)$  and unit direction vector  
184  $\hat{v}_i(t)$  where  $i$  is the individual identity and  $t$  is the current time step. Individuals modify their own motion by responding to  
185 neighbours within a certain distance from them. They turn away from  $n_r$  neighbours encountered within a small repulsion  
186 zone of radius  $r_r$ . This represents collision avoidance and maintenance of personal space, and as is apparent in real animal  
187 groups, takes highest priority.

$$\vec{d}_i(t + \Delta t) = - \sum_{i=1, i \neq j}^{n_r} \frac{c_j(t) - c_i(t)}{|c_j(t) - c_i(t)|} \tag{38}$$

where  $d_i(t + \Delta t)$  represents the individual's desired direction of travel in response to conspecifics. If no neighbor is present in this zone, the focal individual is attracted to and aligns with  $n_a$  neighbours within a larger interaction zone of radius  $r_a$ .

$$\vec{d}_i(t + \Delta t) = \sum_{i=1, i \neq j}^{n_a} \frac{c_j(t) - c_i(t)}{|c_j(t) - c_i(t)|} + \sum_{j=1}^{n_a} \frac{v_j(t)}{|v_j(t)|} \tag{39}$$

188 Here,  $d_i(t + \Delta t)$  is subsequently converted to the corresponding unit vector  $\hat{d}_i(t + \Delta t) = d_i(t + \Delta t)/|d_i(t + \Delta t)|$ . To  
189 incorporate target preferences, individuals are given information about a preferred direction. Each individual is attributed a  
190 goal vector  $g_i(t)$  that points to one of the targets amongst which the group must choose. For sake of simplicity, we assume all  
191 individuals have a preferred target, and that the number of individuals with preference for a given target is the same as the  
192 number of individuals with preference for any other target. Individuals balance this personal preference with social interactions  
193 using a weighting term  $\omega$  to give their desired direction of travel.

$$\vec{d}_i'(t + \Delta t) = \frac{\hat{d}_i(t + \Delta t) + \omega g_i(t)}{|\hat{d}_i(t + \Delta t) + \omega g_i(t)|} \tag{40}$$

194 Motion of all individuals is subject to noise (error in movement and/or sensory integration) which is implemented by rotating  
195  $\vec{d}_i'(t + \Delta t)$  by a random angle chosen from a circularly wrapped Gaussian distribution centered at 0 and of standard deviation  
196  $\sigma_e$ . Once the desired direction is determined, individuals turn towards  $\vec{d}_i'(t + \Delta t)$  with a maximum turning rate of  $\psi\Delta t$ .

197 As in (15), we implement feedback on  $\omega$ . At each timestep, if individuals find themselves moving in the direction of their  
198 preferred motion (here, within  $20^\circ$  of their preferred direction),  $\omega$  is reinforced by a small value  $\omega_{inc}$  until it reaches a maximum  
199 value  $\omega_{max}$ . Otherwise, it is reduced by  $\omega_{dec}$  until it reaches 0. Since the group stays together, group movement towards a  
200 given option activates individuals with similar directional preferences by increasing their  $\omega$  while inhibiting individuals with  
201 opposing directional preferences by decreasing their  $\omega$ .

202 We also perform simulations without feedback on  $\omega$  to emphasise that this is an essential feature for the model to produce  
203 bifurcations based on egocentric geometry of the presented options (Fig. S17). Without the feedback, the model predicts that  
204 animal groups will rarely leave the averaging regime and that groups tend to split. For the three-choice case, in the few cases  
205 where the group does not split, it approaches the middle target (Fig. S17).

206 **2.3 Simulations.** We simulated a group of sixty agents exposed to two or three targets in their environment. Individuals were  
207 initialized in proximity to (0, 0) with random positions and directions. For the two-choice case, targets were positioned at a  
208 distance of 5 units and  $60^\circ$  apart from the group's perspective (corresponding to target locations in the neural model, and the  
209 fly experiments). This places the two targets at locations (4.33, -2.5) and (4.33, 2.5) respectively. For three targets, distance  
210 was still maintained at 5 units but successive targets were now placed  $40^\circ$  apart. The targets were now located at (3.83, -3.21),  
211 (5, 0) and (3.83, 3.21). All individuals were assigned a preferred target randomly such that each target had equal number of  
212 individuals whose goal vector pointed to it. We ran simulations with and without feedback on the  $\omega$  term to show that this  
213 feature is essential to produce such patterns (Fig. S17). We ran 500 replicate simulations for each condition and each replicate  
214 run was considered successful when the group reached a given target without splitting.

### 215 3. Experiments with fruit flies (*Drosophila melanogaster*)

216 **3.1 Fly preparation.** All experiments were conducted on 3- to 5-day old female wild-type CS strain *Drosophila melanogaster*  
217 raised at  $26^\circ\text{C}$  on a 12 hr light, 12 hr dark cycle. Prior to the experiment, individual flies were anaesthetized in an icebox.  
218 The anaesthetized flies were placed on a Peltier stage maintained at  $4^\circ\text{C}$  and glued to a 0.15 mm V2A stainless steel pin  
219 using UV-curing glue. The animals were given at least 20 min to recover from the anesthesia before introducing them to the  
220 experimental setup. All experiments were carried out in the last 4 hr of the animal's subjective day at  $20^\circ\text{C}$ .

221 **3.2 Fly virtual reality experiments.** Experiments were conducted in a flyVR setup procured from loopbio GmbH. Tethered  
222 flies were positioned in the center of an acrylic bowl of diameter 20 cm, lowered 7 cm from the bowl surface. The bowl is  
223 used as a hemispherical projection surface for the visual stimuli. Flies were filmed from an angle using a camera (Basler  
224 acA645-100gm; lens: kowa 25 mm/f 1.4) equipped with an infrared filter (Lee filters, transmission above 730 nm) at 100 Hz  
225 and were illuminated using infrared light at 850 nm to track their heading direction. We assume that the fly flies at constant  
226 speed of 0.2 m/s in this direction to close the loop in our 2D virtual reality setup. A constant speed assumption causes the  
227 visual stimulus to update even when the fly stops flapping its wings. To ensure that the fly flies (flaps its wings) during the  
228 entire course of the experiment, the experimenter gently blew on it when it stopped flying. Trials where flies stopped flying  
229 more than five times during the course of the experiment were excluded from further analyses.

230 **3.3 Visual stimuli.** Custom 3D scenes were designed using 3D modelling program Blender (version 2.77) and projected on the  
231 bowl with a projector (Optoma ML750e DLP) at 120 Hz refresh rate. The stimulus created was a white 'shadeless' cube of side  
232 50 m that served as background and ten black cylinders of 1m diameter each. Making the objects shadeless removes interaction  
233 of the object with light and hence removes any edges that may otherwise be visible on the cube. The position of each cylinder  
234 was determined from an SQLite database that was generated automatically (see experimental design for details). Pillars that  
235 were not part of the current stimulus were placed at  $>100$  m distance where they were visually occluded by the cube.

236 **3.4 Data collection.** Tethered *Drosophila melanogaster* were exposed to either a two-choice or a three-choice decision task in the  
237 virtual reality environment. Each experimental trial lasted 15 min where flies were exposed to five stimuli—three experimental  
238 stimuli and two control stimuli. The experimental stimuli consisted of two or three cylinders (depending on the experimental  
239 condition) that were presented to the animal in three different angular conditions. The order in which the stimuli were  
240 presented were randomized. The control stimulus was presented before and after the experimental conditions. This was a stripe  
241 fixation task where the fly was exposed to a single cylinder and was expected to orient and fly towards this cylinder. This is  
242 a well-known response in tethered *Drosophila* and flies that did not perform this were excluded from further analyses. The  
243 actual position of cylinders in all stimuli were randomized rotationally to prevent effects of any directional bias that may arise  
244 from the geometry of the physical setup around the fly. In all conditions, the position of the fly was reset to the origin once it  
245 reached a cylinder or flew a corresponding distance in any direction. To ensure true randomizations during our experiment, we  
246 implemented them prior to starting any experimentation. An SQLite database was created which had positions of all posts for  
247 all experiments. A total of 60 flies were tested in the VR setup. Of these, 30 flies were exposed to a stimulus that consisted  
248 two targets, and 30 flies were exposed to a stimulus that consisted three targets.

249 **3.5 Data analysis.** Each trajectory of a fly (travelled in virtual space from the origin till the position when the location of the fly  
 250 was reset) was considered to be an event. We rotated all trajectories such that the x-axis points from the origin, to the centre  
 251 of mass of the targets (see Fig. S11 for fly trajectories in the presence of two and three options). To visualize trajectories in  
 252 the various experimental conditions, we create time-normalized (proportion of maximum) density plots. Each density plot  
 253 was constructed by picking, for each pixel, the maximum value among normalized density plots (proportion of maximum)  
 254 for varying times in a sliding time window. In the two-choice case, flies show no bias towards either target, and the trial results are  
 255 symmetric about the  $x$ -axis. For the three-choice case, we observe some asymmetry that may arise from random perturbations  
 256 that inherently affect individual trajectories. We symmetrize our data by mirroring it about  $y = 0$  to remove this asymmetry  
 257 (based on the two-choice results). Next, to quantify the decision points, we fold the data about the line of symmetry,  $y = 0$ .  
 258 We then applied a density threshold to the time-normalized (proportion of maximum across a sliding time window) density  
 259 plot to reduce noise and fit a piecewise phase transition function to quantify the bifurcation.

$$y = \begin{cases} 0 & x \leq x_c \\ A|x - x_c|^\alpha & x > x_c \end{cases} \quad [41]$$

where  $x_c$  is the critical bifurcation point,  $\alpha$  is the critical exponent, and  $A$  is the proportionality constant. To avoid bias in the fit that arises from  $y = 0$  part of the data (to the left of the bifurcation), we exclusively fit the above function in a range starting near to the suspected bifurcation point. For the three-choice case, the piecewise function is fit to each bifurcation separately. Additionally, for each bifurcation we also performed randomization tests where we repeated the exact fit procedure described above to data where the trajectories were randomized by keeping the  $x$ -coordinates, and swapping the  $y$ -coordinates with values from other random events. Occurrences of a bifurcation is then assessed using the following criteria: (a) The bifurcation occurred between  $x = 0$  and  $x = T_x$ , where  $T_x$  is the  $x$ -coordinate of the two targets in consideration, (b) The critical exponent  $0.2 < \alpha < 2$ , and (c) The proportionality constant  $A > 0.2$ . Based on these criteria, randomizations showed that the resultant fit to our experimental data were highly significant ( $p < 0.01$  for binary choice and  $p < 10^{-4}$  for the three-choice case).

## 260 4. Experiments with desert locusts (*Schistocerca gregaria*)

261 **4.1 Locust preparation.** All experiments were conducted on instar 5 desert locusts (*Schistocerca gregaria*) raised in the Animal  
 262 Research Facility of the University of Konstanz. Locusts were moved to the experimental room one night prior to the experiment,  
 263 where they were maintained at 26 °C. Experiments were then conducted at ~31 °C and 20 – 22% relative humidity with fully  
 264 intact locusts. Each locust was used only once.

265 **4.2 Locust virtual reality experiments.** Experiments were conducted in a locustVR setup procured from loopbio GmbH (Fig.  
 266 S10). The setup consists of three main components: (a) the locomotion compensator, (b) the recording system with a closed-loop  
 267 extension, and (c) the FreemoVR system (16).

268 The locomotion compensator (a) is a two-dimensional treadmill composed of a hollow polyethylene sphere of diameter 60  
 269 cm. Two servo-motors with rotary encoders turn the sphere to compensate for the animal's movement, allowing it to move  
 270 infinitely on the sphere (mechanics are adapted from (17)). The recording system with closed-loop extension (b) consists of a  
 271 recording unit—a 100 fps infrared machine vision camera and an LED spotlight at 850 nm (infrared) and functions as the  
 272 tracking and feedback-loop component of the system. Tracking the animal's movement facilitates feedback to the locomotion  
 273 compensator to keep the animal centered on the sphere. Optical tracking is performed using a contrast-based method. The  
 274 optical center of mass of the animal is detected and its deviation from the center of the sphere is converted into a compensation  
 275 response of the motors. Finally, the closed-loop extension software feeds the animal movement to the VR system (c) to update  
 276 projection of the stimulus accordingly. A vertical cylinder (70 cm tall; 80 cm diameter) was used as the projection surface and  
 277 projections were done using three Optoma GT1070Xe projectors with overlapping projections. From the animal's perspective,  
 278 this projection surface covers 360° field-of-view horizontally, and 74.9° vertically.

279 **4.3 Visual stimuli.** Custom 3D scenes were designed using 3D modelling program Blender (version 2.77) and projected on the  
 280 projection surface. The stimulus created was identical to what is described above for flies (see Section 3.3), with the exception  
 281 that the target cylinders for the locusts were of diameter 0.2 m.

282 **4.4 Data collection.** The data collection procedure for the desert locusts was identical to the procedure adopted for flies (see  
 283 Section 3.4) except each experimental trial lasted 48 min—the three experimental stimuli lasted 12 min each, and the two  
 284 control stimuli lasted 6 min each. As with the flies, the control stimulus was a stripe fixation task for the two-choice experiments.  
 285 For the three-choice experiments, however, this was modified to be a two-choice decision task. A total of 156 locusts were  
 286 tested in the VR setup. Of these, 57 locusts were exposed to stimulus that consisted two targets, and 99 locusts were exposed  
 287 to a stimulus that consisted three targets (see Fig. S12 for locust trajectories during decision-making in the presence of two  
 288 and three options).

289 **4.5 Data analysis.** The analyses procedure adopted for the desert locusts was identical to the procedure adopted for flies (see  
 290 Section 3.5). Randomizations performed on locust trajectories also showed that the resultant fit to these experimental data  
 291 were highly significant ( $p < 0.01$  for binary choice and  $p < 10^{-4}$  for the three-choice case).



## 292 5. Experiments with larval zebrafish (*Danio rerio*)

293 **5.1 Fish preparation.** All experiments were conducted on 1 cm  $\pm$  0.1 cm long zebrafish (*Danio rerio*) of age 24 to 26 days  
294 post-fertilization raised in a room at 28 °C on a 16 hr light, 8 hr dark cycle. The fish were bred and raised by the animal  
295 care staff of the Department of Collective Behaviour at the Max Planck Institute of Animal Behavior and the University of  
296 Konstanz. Fish were transferred to the experimental room at least 12 hr prior to the experiments in water from their holding  
297 tanks. This ensured that the water quality and temperature in the experimental room was the same as in their holding facility.  
298 This water was also used in the VR setups where a water change was done once a day. All fish were tested individually. They  
299 were naive, and chosen at random from their holding tanks. All experiments were conducted in accordance with the animal  
300 ethics permit approved by Regierungsprasidium Freiburg, G-17/170.

301 **5.2 Fish virtual reality experiments.** Experiments were conducted in a fishVR setup procured from loopbio GmbH (See (16) for  
302 setup details). Larval zebrafish were tested in an acrylic bowl of diameter 34 cm between 07:00 and 19:00. Once a fish was  
303 introduced in the arena, it was given 20 min to acclimatize to the environment. This was followed by a 10 min control where it  
304 was presented a single virtual conspecific circling the arena in a circle of radius 8 cm (Fig. S14). The purpose of this control  
305 was to assess whether the real fish would follow a virtual conspecific. We later included data from all fish in our analysis as  
306 nearly all of them followed the virtual fish during this control. After the control, the real fish was exposed to choice experiments  
307 that lasted 1.5 hr with the virtual fish initialized with random lateral distances between them and random swim direction.

308 **5.3 Visual stimuli.** Custom 3D scenes were designed using 3D modelling program Blender (version 2.77) and projected on the  
309 bowl with a projector (Optoma ML500) at 100 Hz refresh rate. The stimulus created was a larval zebrafish of length 1 cm. The  
310 fish was set to swim at an average speed of 4 cm/s with burst-and-glide motion extracted from a random real fish's swimming  
311 pattern (Fig. S14). The background for the stimulus was light blue, the default projection color on the Optoma projector.

312 **5.4 Data collection.** As choice experiments, the real fish was exposed to two or three virtual conspecifics that swam side-by-side  
313 with lateral distance between them varying from 0.5 cm to 10 cm (in steps of 0.5 cm). The virtual fish swam back-and-forth at a  
314 3 cm depth, and along a straight line of length 24 cm (Fig. S13). To exclude boundary effects and the effect of sharp turns that  
315 the virtual fish make near the edge, we only consider data where the virtual fish are farther than 5 cm from the boundary for  
316 further analyses. The following filters were used to extract data where the real fish was considered to be potentially interacting  
317 with virtual conspecifics:

- 318 1. A distance filter determined whether the real fish had the opportunity to interact with a virtual fish. If the real fish was  
319 within 5 cm front-back distance or 5 cm left-right distance of the outermost virtual fish, it was considered to be within  
320 interaction range.
- 321 2. Since the real fish receives no feedback from its virtual conspecifics, we only consider cases where the virtual fish lead  
322 the real fish i.e. cases where the virtual fish are ahead of the real fish in a coordinate system centered at the real fish's  
323 frame of reference, and where the real fish is behind the virtual fish in a coordinate system centered at the centroid of the  
324 virtual fish and pointing in the direction of their motion.
- 325 3. Since we are interested in which conspecific(s) the real fish will follow, we exclude all data where the angle between the  
326 real fish's direction and the virtual fish's direction ( $\phi$ ) is larger than 30°.
- 327 4. Finally, for the purpose of analysis, we switch identities of the virtual fish after each turn. This is done to ensure relative  
328 positions of the virtual fish are conserved; that virtual fish are always treated as being to the left or right of the real fish.

329 A total of 390 fish were tested. Of these, 198 fish were exposed to decision-making with two virtual targets, and 39 fish were  
330 exposed to decision-making with three targets. In the two-choice case, the real fish experienced five different virtual fish speeds.  
331 Our analyses focus only on data where the virtual fish swim at an average speed of 4 cm/s, the average swim speed of larval  
332 zebrafish. We also conducted experiments where the real fish was exposed to a single virtual fish, or where two real fish were  
333 tested in pairs with no stimuli. 39 fish were exposed to a single virtual fish while 114 fish were tested in pairs (57 pairs) and  
334 without stimuli. When real fish were tested in pairs, data were filtered to only consider cases when the two fish maintained a  
335 distance of 0.5 cm to 20 cm between them (tracking accuracy reduced at distances closer than this). Relative 3D positions were  
336 then collected by reorganizing the follower's position in the leader's coordinate frame (all relevant filters used in the virtual fish  
337 case were also used here). Comparing these two cases—two real fish compared to one real fish swimming with one virtual  
338 fish—we find that in the VR, and otherwise, the two fish swim on the same plane (Fig. S15). Hence, all further analyses for  
339 decision-making were conducted on this plane in 2 dimensions.

340 **5.5 Data analysis.** The main focus of our analyses was to reveal the role of lateral distance between the virtual fish  $L$ , on the  
341 decision of the real fish to follow these virtual targets. We applied the above mentioned filters to the data and obtained a  
342 density plot of the real fish's position in a coordinate system centered at the centroid of the virtual fish's positions (Fig. S13;  
343 see Fig. S16 for density plots for varying lateral distance between the virtual fish). The marginal distributions along the  
344 direction of the virtual fish's motion for various lateral distances  $L$  are then normalized (proportion of maximum) and stacked  
345 to obtain the bifurcation plot (Fig. S13). This figure plot shows the effect of virtual fish geometry on the real fish's position  
346 while following them. An identical protocol was followed to obtain the three-choice bifurcation plot.

## 347 **Supplementary Text**

### 348 **Model features that determine network behavior**

349 Based on our theoretical studies, we conclude that our results are robust to the model assumptions, and the algorithm described  
350 is generic; that decision-making systems will break multi-choice decisions to a series of binary decisions so long as they share  
351 the following features:

- 352 1. Neurons in the decision-making ensemble exhibit local excitation and long-range/global inhibition. The locality of their  
353 excitation modulates, or the extent of their directional tuning determines the exact location of the bifurcation.
- 354 2. Decision-making is spatially explicit. As the animal moves through space, its geometrical relationship with the targets  
355 changes. Since neural interactions depend on the geometrical relationship of the individual with the targets, space  
356 provides a continuous variable by which the individual traverses the time-varying landscape of neural firing rates.

357 Although detailed models considering the specifics of each system would be expected to provide additional quantitative  
358 fits (at the expense of losing some generality and analytical tractability), our results are broadly independent of the model  
359 implementation details. Based on direct comparison with experimental results from fruit-flies (*Drosophila melanogaster*),  
360 desert locusts (*Schistocerca gregaria*) and zebrafish (*Danio rerio*), we conclude that “cosine-shaped” interactions cannot  
361 explain trajectory patterns observed in real animals; that the brain represents space in a non-Euclidean fashion and excitatory  
362 interactions among neurons are more local (Fig. S1). Beyond this, the bifurcation patterns observed are agnostic to the exact  
363 nature of neural interactions. We illustrate this by using truncated Mexican hat-shaped neural interactions that produce similar  
364 predictions at the level of animal movement (Fig. S1). We specifically chose this function as it has been shown to represent  
365 orientation selectivity in neurons of the visual cortex (18).

$$J_{ij} = A (1 - h\theta_{ij}^2) \exp(-h\theta_{ij}^2) - c \quad [42]$$

where,  $A$  is the amplitude of the Mexican hat,  $\theta_{ij}$  is the angle between preferred directions of neurons  $i$  and  $j$ ,  $h$  is the concentration of the hat and  $c$  represents global inhibition. Thus, neural interactions with both long-range inhibition and global inhibition make similar predictions regarding the animal’s movement.

### 366 **Experiments in virtual reality**

367 Testing our model predictions experimentally is expected to be difficult. If we are correct, by far the clearest window into the  
368 system dynamics will be when animals are presented with two, or more, identical options. This is due to the fact that the very  
369 reason that the brain should exhibit bifurcation dynamics—to maximize sensitivity—will also result in amplification of subtle  
370 differences between options to obscure our ability to see the underlying system bifurcations. The fact that the experimentalist  
371 may often be unaware of such differences (such as a slight air motion, or light gradient, or other differences imperceptible to  
372 humans), and that these differences can break the symmetry (between apparently identical options) makes these experiments  
373 extremely challenging with a conventional design. To address this limitation, we conduct our experiments in immersive virtual  
374 reality (16) in which we can (instantly) randomize our starting conditions, and conduct relatively high-throughput analysis of  
375 spatial decision-making.

### 376 **Predictions for symmetric geometries and increasing number of targets**

377 So far, we have discussed predictions from the model and experimental results for the two- and three-choice cases for specific  
378 geometries. However, as described section 5.4, we conducted choice experiments for fruit-flies in three different geometrical  
379 configurations. An especially interesting case here is one where the targets are in radial symmetry—two targets 180° apart  
380 or three targets 120° apart. Once again, we find congruence among predictions of our neural model, the animal collectives  
381 model and behavioral experiments with flies (Fig. S9). Because these symmetric conditions represent cases where the animal is  
382 already beyond the bifurcation angle, we find that it goes straight to one of the available targets. Further, to illustrate model  
383 results beyond three targets, we also ran simulations for four, five, six, and seven targets. Once again, our predictions hold and  
384 the agent continues to eliminate targets based on egocentric geometry, thus binarising its decisions (see Fig. 2 in main text).

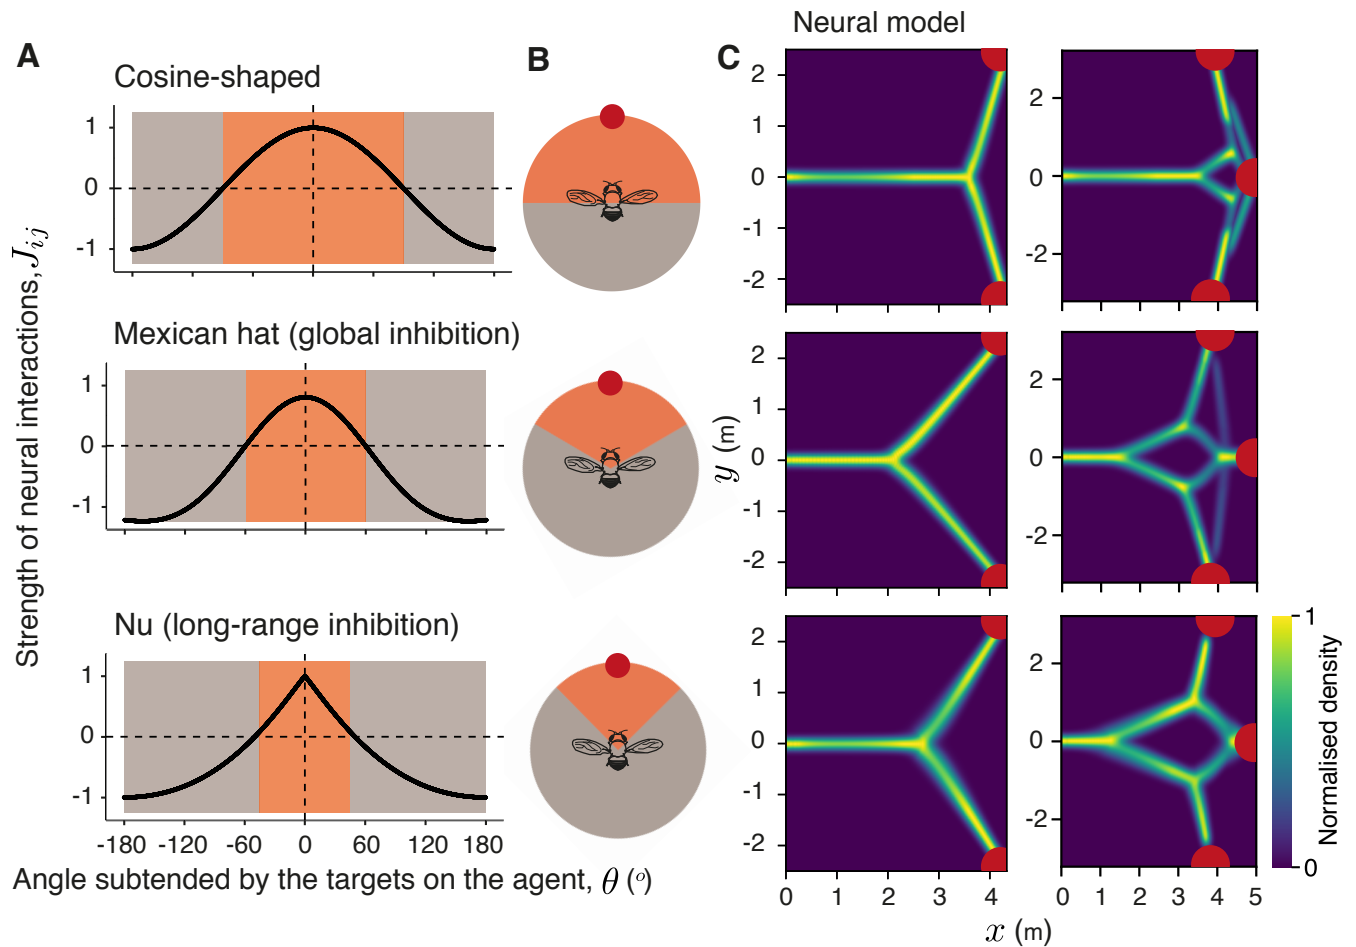

**Fig. S1.** Relationship between the nature of neural interactions and the bifurcation patterns observed in the agent's trajectory. (A) The strength of neural interactions as a function of the angular distance between directions encoded by the neurons. We explore models with three different type of neural interactions, a global "cosine-shaped" interactions model, and two local models—with a truncated Mexican hat-shaped interaction curve (amplitude  $A = 1.8$ , hat concentration  $h = 0.25$  and global inhibition  $c = 1$ ), and a model where  $\nu = 0.5$ . The orange region indicates angles where  $J_{ij}$  is positive—excitatory interactions, and the grey region indicates negative  $J_{ij}$ —inhibitory interactions. (B) A simplified representation of this in polar coordinates. (C) Density plots of trajectories adopted by a model for the corresponding neural interaction curves. The axes represent  $x$ - and  $y$ -coordinates in Euclidean space. Comparing agent trajectories from the simulations with experimental results (see Fig. 1 in main text) from fruit flies and desert locusts reveals a lack of fit by a model with "cosine-shaped" interactions.

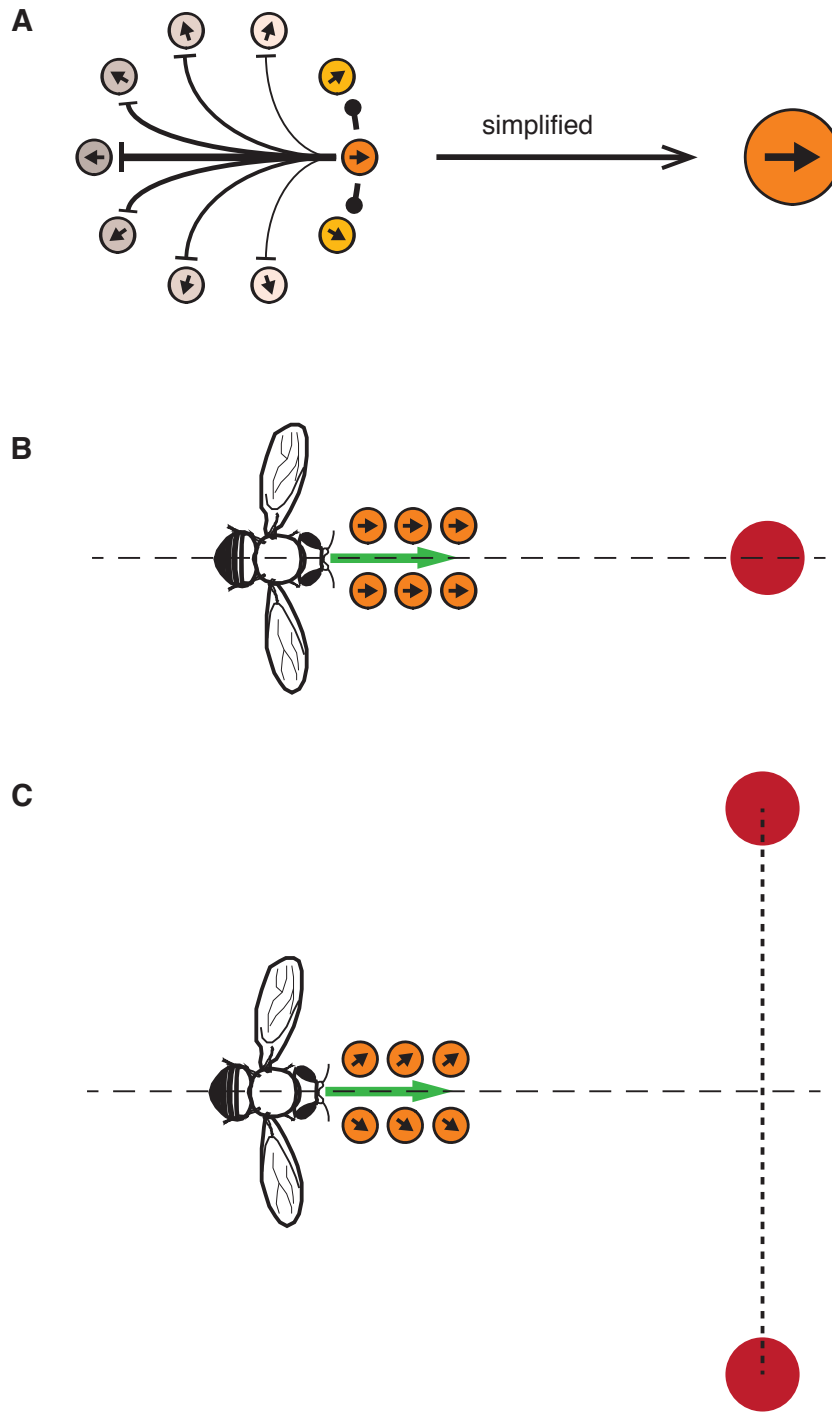

**Fig. S2.** Schematic of the goal-direction cells in an animal's brain when moving through space. (A) It is known that an ensemble of neurons in the brain collectively represents direction to goals (2). Here, we simplify this by representing neurons in the model that individually represent direction to a target. (B) The decision-making ensemble is assumed to be a collection of such goal-directed neurons. (C) In presence of multiple targets, the ensemble is composed of multiple neural populations that encode directions to the different targets. The agent's decision is thus a consensus among neurons in this ensemble.

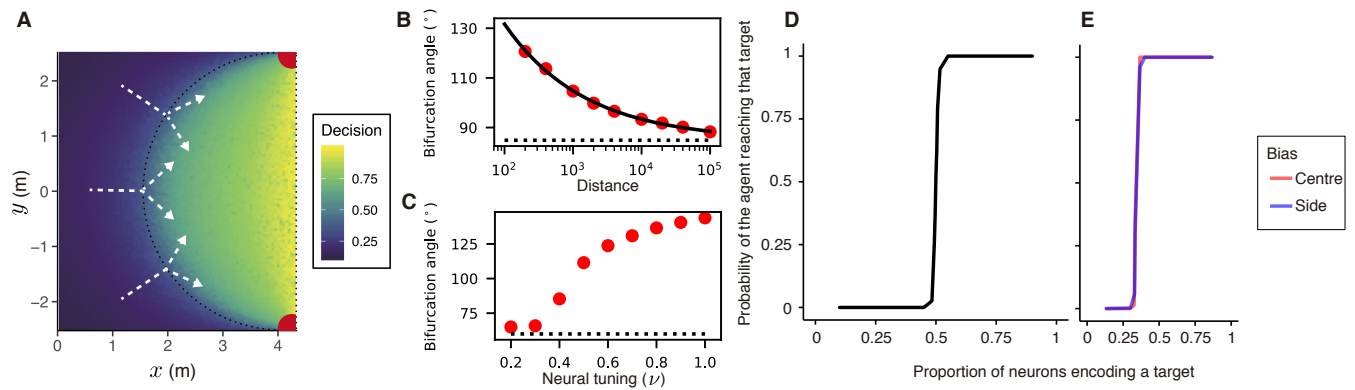

**Fig. S3.** Robustness of bifurcations to spatial and system parameters. (A) A heatmap showing whether or not the neural network has reached a consensus. The agent makes a decision close to the black dotted arc, which represents the locus of a point that is equidistant from the two targets. Angle subtended by the targets on the animal determines the location of the bifurcation. White dotted lines show example trajectories of animals as they would move through space. The axes represent  $x$ - and  $y$ -coordinates in Euclidean space. The exact value of the critical bifurcation angle results from the interplay between two timescales—a timescale for movement and one for the neural dynamics. (B) Effect of the starting distance to the targets on the critical bifurcation angle. We fit an exponential decay to the points to obtain the critical angle (represented here as a dotted line). (C) The neural tuning parameter ( $\nu$ ) also influences the bifurcation angle. Here, the angle flattens at 60° (represented by the dotted line) as this is the starting angular condition where the agent is initialized. (D-E) Minor difference between the targets causes the agent to choose the correct target with near certainty. The slope of the sigmoid indicates sensitivity of the system. D shows this sensitivity in the presence of two targets while E shows this for the three-target case. Here, we separate sensitivity to the center target vs sensitivity to a side target. As shown, the agent is equally sensitive to all three targets in its environment. See Table S1 for model parameters used here.

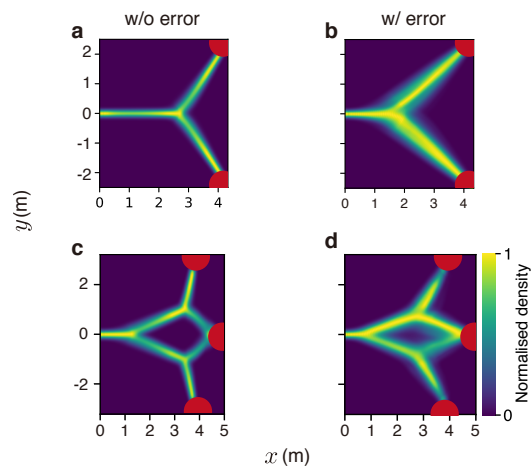

**Fig. S4.** The role of directional error on simulated trajectories. Results of our neural model without (A, C) and with (B, D) implementation of gaussian error and the 'overlap' function for decision-making in a two- (A and B) and three-choice (C and D) context. The symmetric case modelled here puts the targets at an angular configuration where the 'overlap' function does not affect predicted results. However, Gaussian error still introduces noise in the simulated trajectories. Parameters used were identical to Fig. S8. The axes represent  $x$ - and  $y$ -coordinates in Euclidean space.



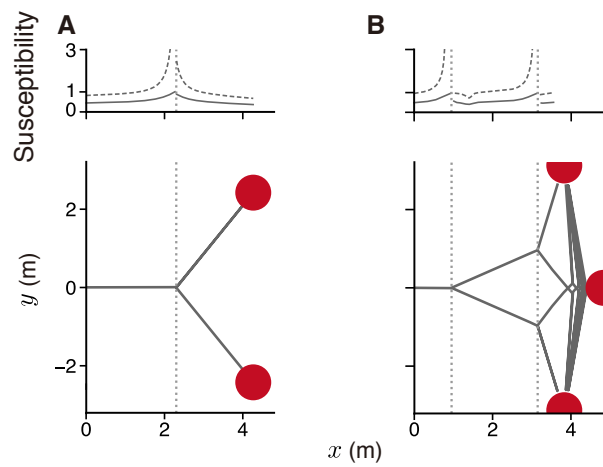

**Fig. S5.** Predicted trajectories and susceptibility from the mean-field approximation. Predicted animal trajectories for decision-making in a two-choice (A) a three-choice (B) context. In both A and B, the susceptibility in the mean-field approximation (dashed line) diverges at the bifurcation points (represented here by the dotted vertical line). The solid line represents the short time average responses of one neuron flip in reaction to one biased neuron towards one of the targets. The short time response shows a peak at the bifurcation point and is normalized by its maximal value. See Table S1 for parameters used.

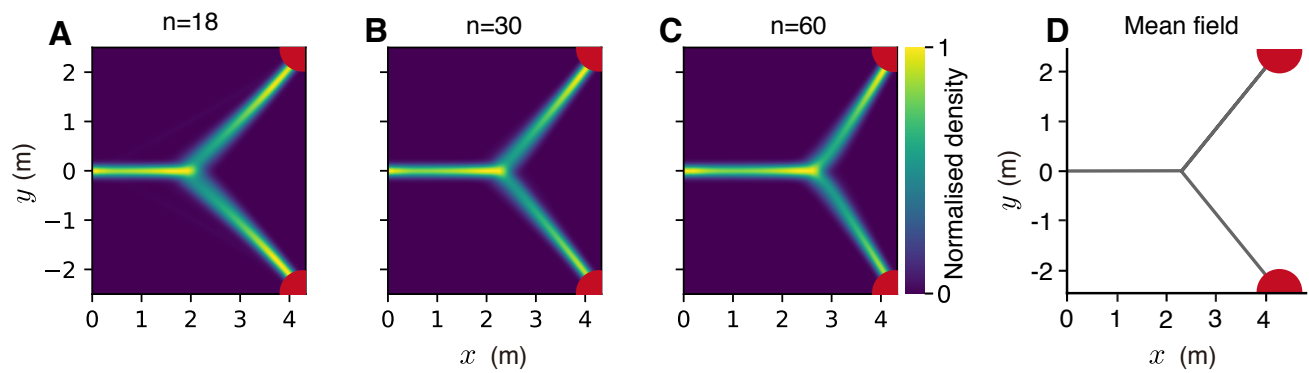

**Fig. S6.** Effect of system size on observed bifurcations. Comparison of panels A-D shows that bifurcation patterns are observed both for small and large system sizes. Panels A, B, and C show trajectories predicted by the neural model for system sizes  $N = 18$ ,  $N = 30$ , and  $N = 60$  respectively. Panel D shows the predicted trajectories at the mean-field limit of very large system sizes  $N \rightarrow \infty$ . The axes represent  $x$ - and  $y$ -coordinates in Euclidean space.

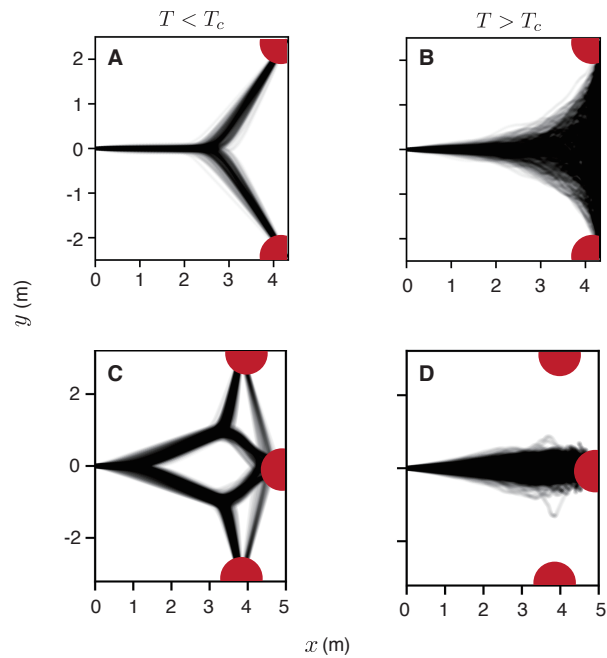

**Fig. S7.** Role of neural noise on producing the experimentally observed bifurcation patterns. Each panel contains trajectories from 500 replicate simulations of our neural decision-making model. The model reproduces experimentally observed bifurcation patterns below a critical level of neural noise (A and C). Above this critical noise level, the agent exhibits diffusive movement for the two-choice case (B) with a bias towards more central targets (D). A and B show trajectories for decision-making in the presence of two targets, while C and D show trajectories for decision-making in the presence of three targets. The axes represent  $x$ - and  $y$ -coordinates in Euclidean space. See Table S1 for parameter values used in A and C. B and D were produced with identical parameters except the neural noise parameter  $T = 2.0$ .

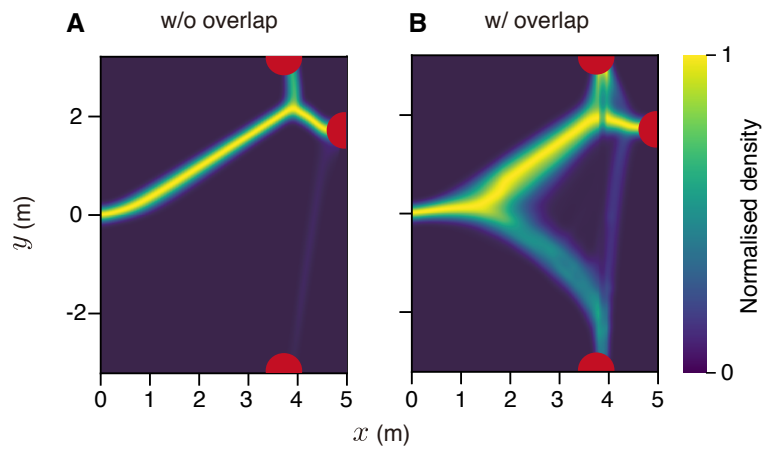

**Fig. S8.** Decision-making in asymmetric geometries. Results of our neural model without (A) and with (B) implementation of the ‘overlap’ function. This function allows us to account for spatial geometries where some targets may be in directional proximity compared to others. The Gaussian error in B was of standard deviation  $\sigma=0.25$ . The axes represent  $x$ - and  $y$ -coordinates in Euclidean space.

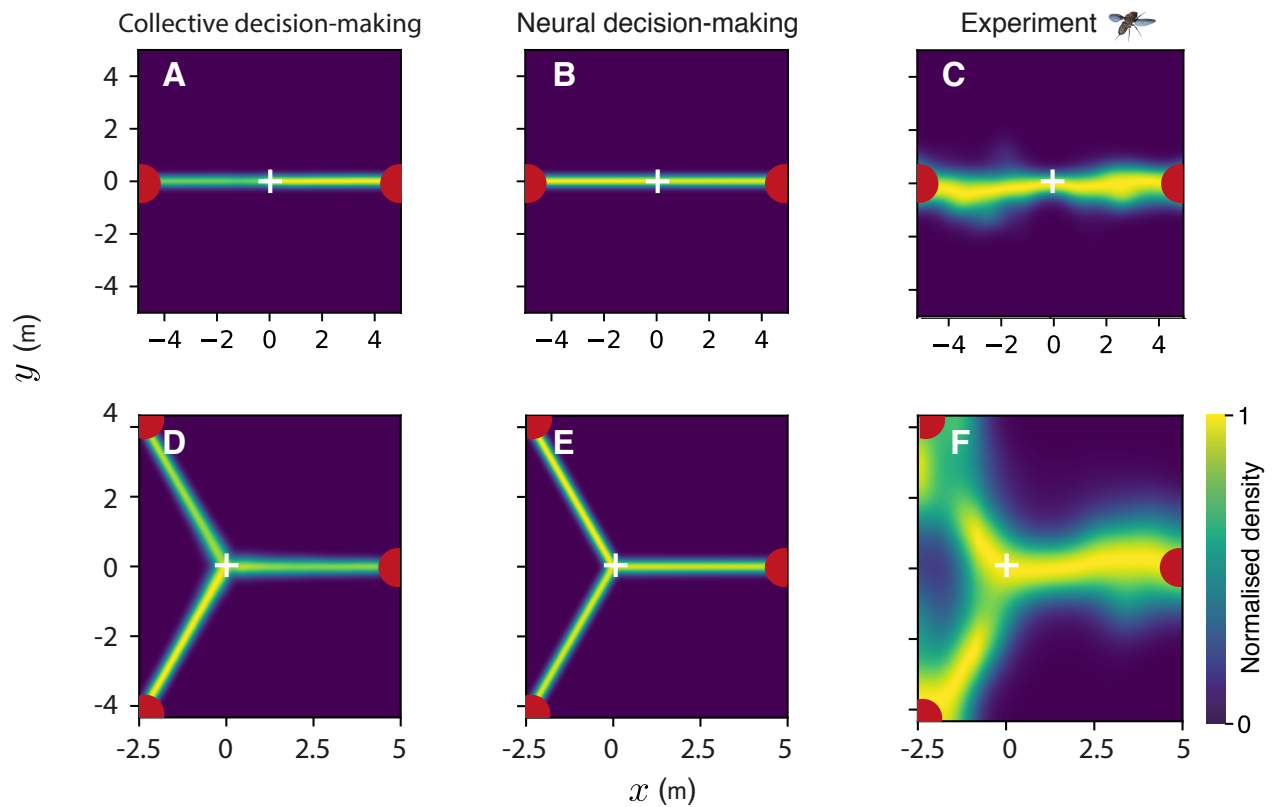

**Fig. S9.** Decision-making in radial symmetry. Trajectories predicted by two different models of decision-making and experimental trajectories obtained from fruit flies, all in the presence of two and three targets placed in radial symmetry. The animal starts at  $(0, 0)$  and chooses one of the available targets. The axes represent  $x$ - and  $y$ -coordinates in Euclidean space. Panels A and D show results for two- and three-choice decision making from a collective decision-making model, B and E show results from our neural decision-making model, and C and F show experimental results of fruit-flies exposed to two and three identical targets respectively. See Table S1 for parameters used in A and D, and Table S2 for parameters used in B and E.

**A** Front global view

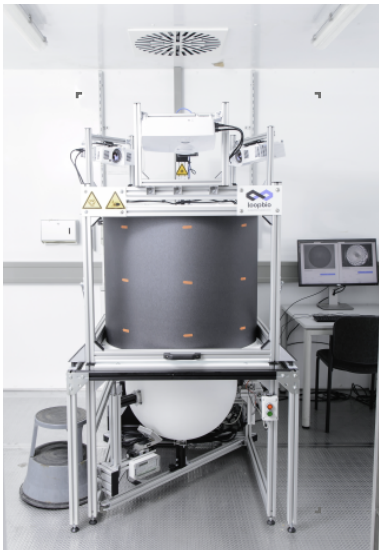

**B** Top view

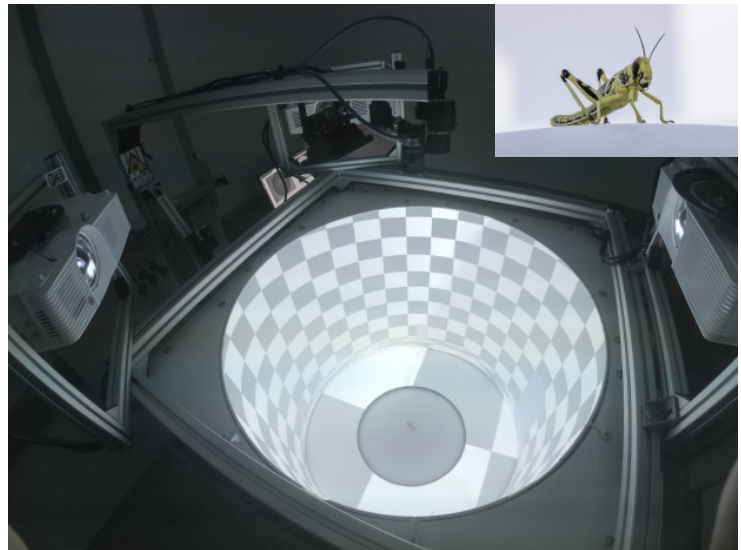

**Fig. S10.** Overview of the locustVR experimental setup. (A) The front-view of the locustVR setup shows the three projectors, the cylindrical projection surface, and the locomotion compensator sphere. (B) The top-view of the setup shows a custom checkerboard stimulus along with the locust on the center of the locomotion compensator sphere. The inset shows a zoomed in side-view of the locust.



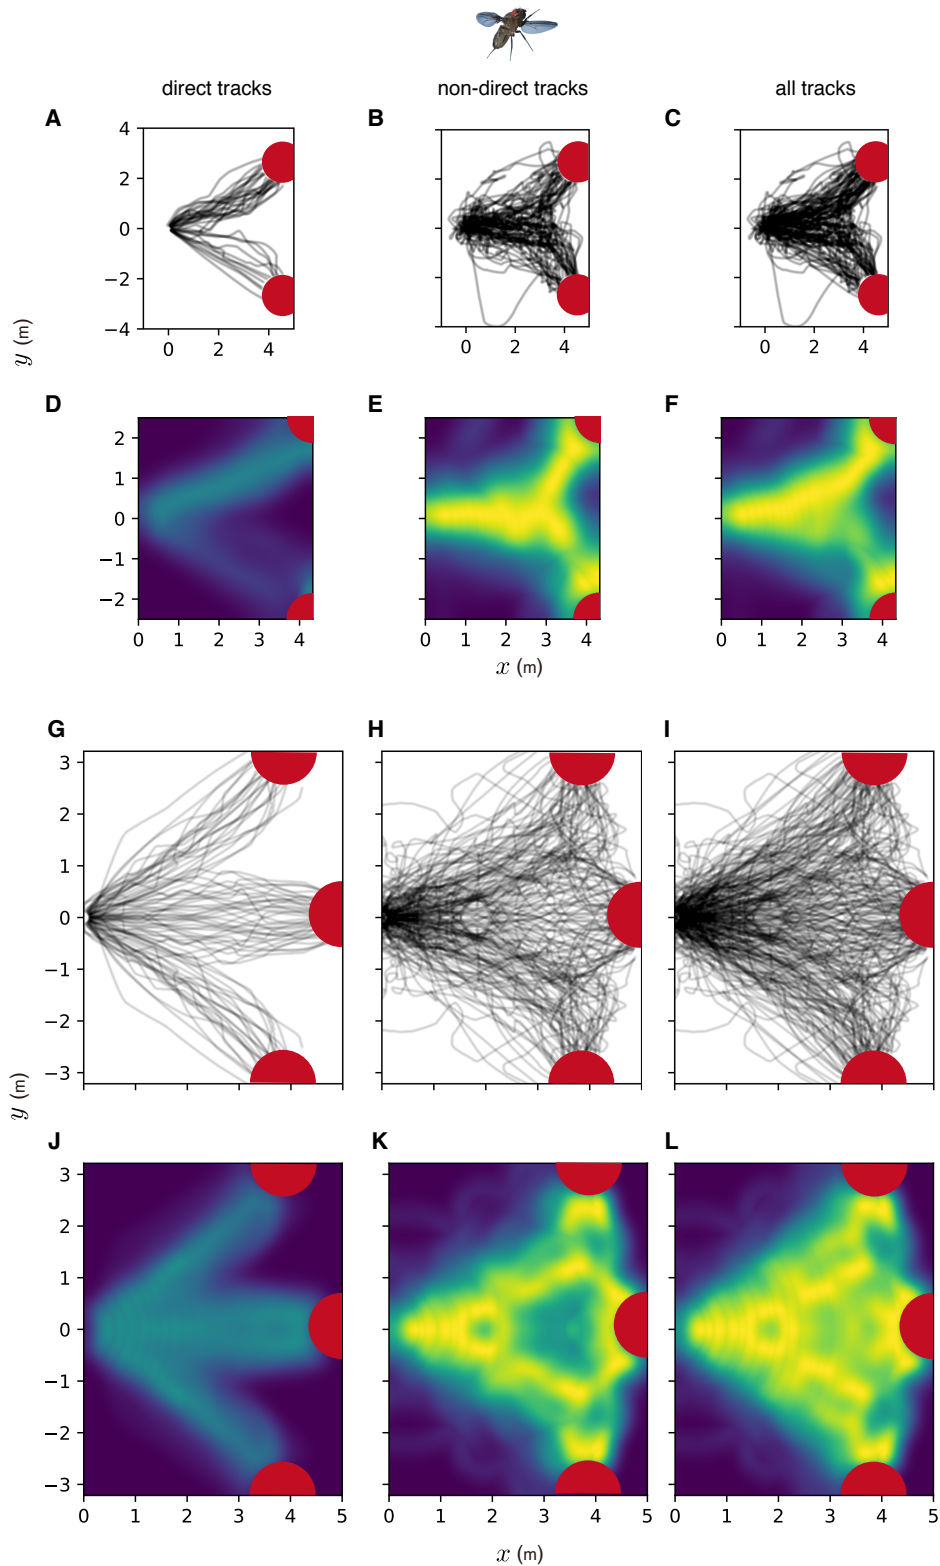

**Fig. S11.** Raw trajectories and density plots of fruit flies exposed to two and three targets. (A-F) present raw trajectories (A-C) and density plots (D-F) of fruit flies exposed to two targets. The axes represent  $x$ - and  $y$ -coordinates in Euclidean space. A shows trajectories where the fruit fly reached the target in a relatively short duration, where trajectories to the targets were relatively direct, and B shows the remaining trajectories that could potentially exhibit the bifurcation. D and E show the corresponding density plots, normalized such that the maximum intensity in E is set to 1, and in D is set to the proportion of trajectories in E relative to this condition. C and F show the raw trajectories and the normalized density plot for all fly experiments combined. Similarly, G-L present raw trajectories (G-I) and density plots (J-L) of fruit flies exposed to three targets. G and J show direct trajectories to a target and the corresponding density plot. H and K show the remaining trajectories that potentially exhibit the bifurcations, and the corresponding density plot. I and L show raw trajectories and the density plot for all fly experiments combined. Note that the three-choice trajectories here are symmetrized for the sake of visualization.

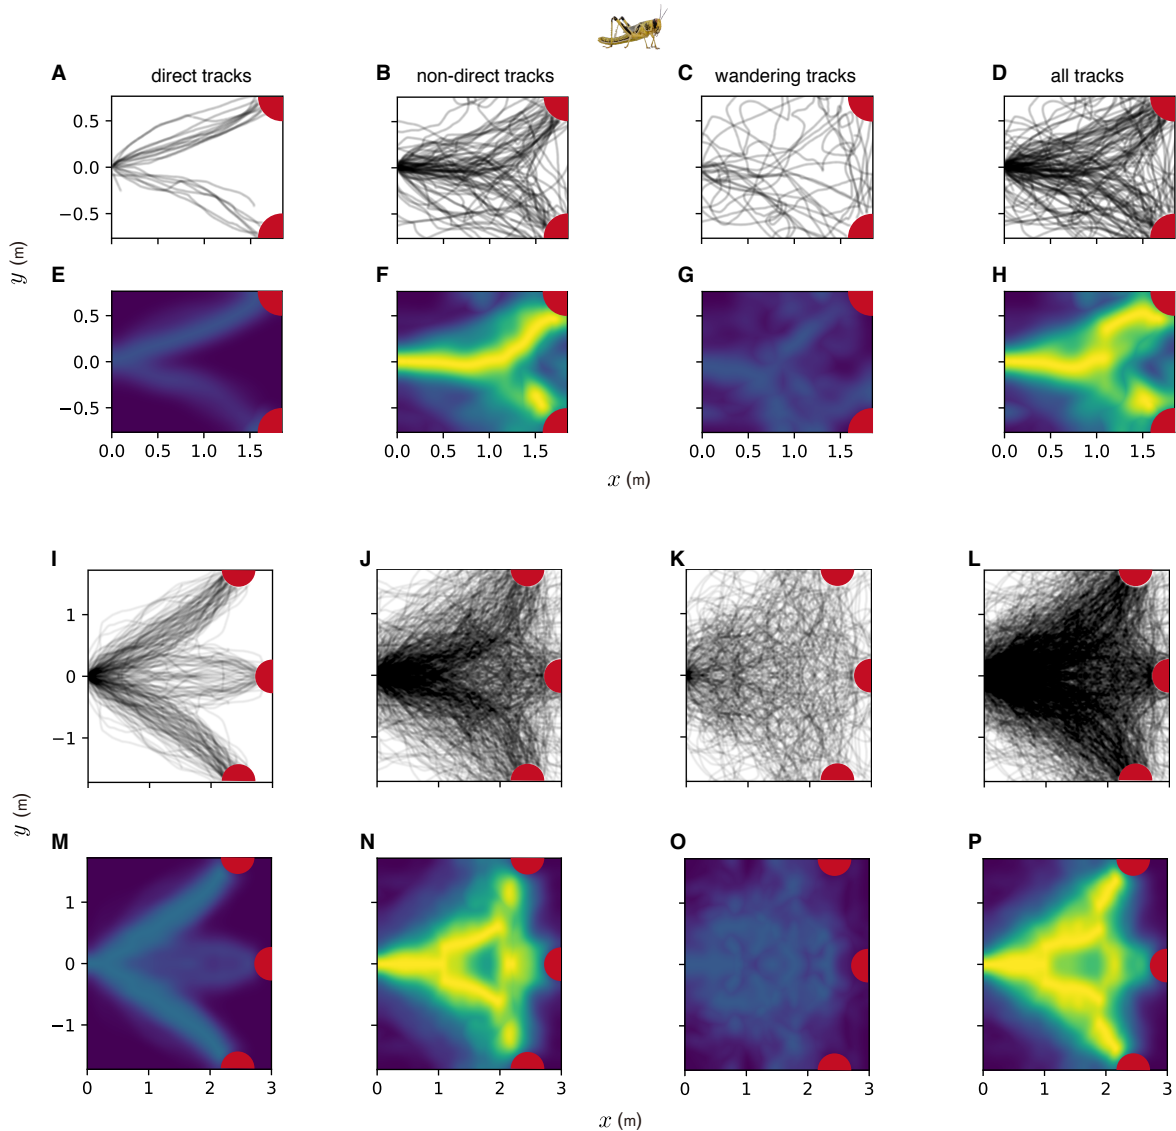

**Fig. S12.** Raw trajectories and density plots of desert locusts exposed to two and three targets. (A-H) present raw trajectories (A-D) and density plots (E-H) of locusts exposed to two targets. The axes represent  $x$ - and  $y$ -coordinates in Euclidean space. A shows trajectories where the locust reached the target in a relatively short duration, where trajectories to the targets were relatively direct, C shows trajectories where the locust took long to reach the target, where trajectories to the targets were noisy, and B shows the remaining trajectories that could potentially exhibit the bifurcation. E-G show the corresponding density plots, normalized such that the maximum intensity in F is set to 1, and in E and G is set to the proportion of trajectories in F relative to this condition. D and H show the raw trajectories and the normalized density plot for all locust experiments combined. Similarly, I-P present raw trajectories (I-L) and density plots (M-P) of locusts exposed to three targets. I and M show direct trajectories to a target and the corresponding density plot, K and O show noisy trajectories to a target and the corresponding density plot, and J and N show the remaining trajectories that potentially exhibit the bifurcations, and the corresponding density plot. L and P show raw trajectories and the density plot for all locust experiments combined. Note that the three-choice trajectories here are symmetrized for the sake of visualization.

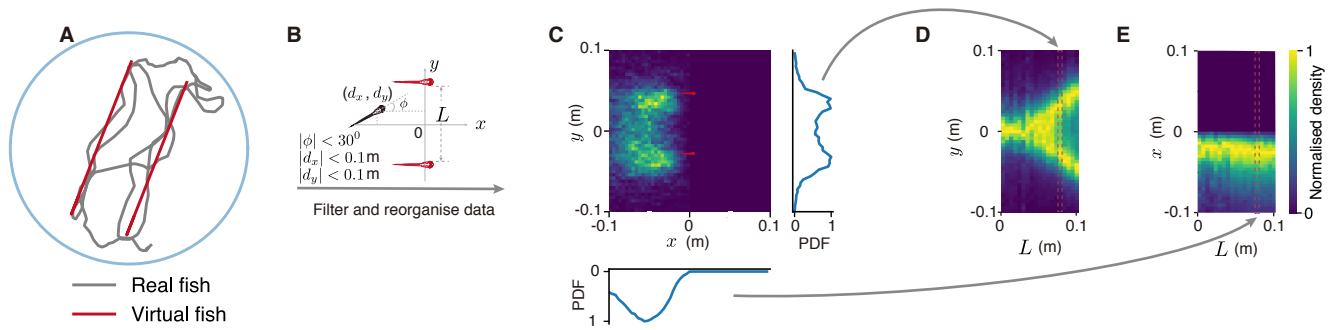

**Fig. S13.** Overview of experiments and data analyses with larval zebrafish. (A) Two virtual fish swim back-and-forth in the arena beside each other at varying lateral distances (0.08 m in this particular case). (B) Data were centered on a coordinate system with origin at the centroid of the virtual fish's positions and decisions were considered along the axis perpendicular to their direction of motion. (C) An example of the real fish's position density relative to the virtual fish. We obtain a normalized marginal probability distribution of the real fish's position (perpendicular to the virtual fish's movement direction) and stack these distributions for varying lateral distances between the virtual fish (D). We can do this without losing information along the virtual fish's movement direction as the real fish maintains relatively stable front-back distance with its virtual conspecifics (E).

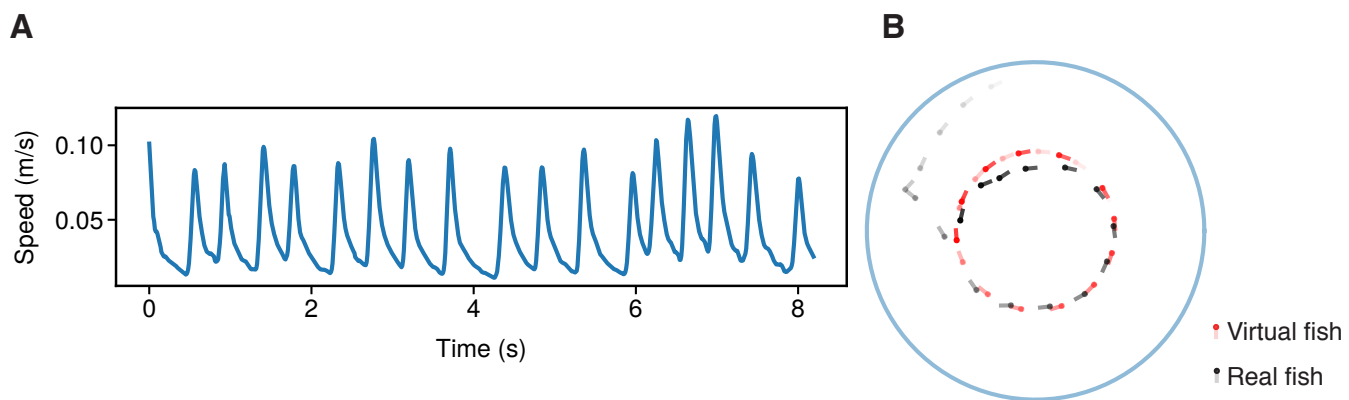

**Fig. S14.** Behavioral experiments with larval zebrafish in virtual reality. (A) Burst-and-glide movement adopted by the virtual zebrafish. The average movement speed was extracted statistically from freely swimming larval zebrafish and the burst-and-glide movement was adopted from a random real fish. (B) Interaction of the real fish with its virtual conspecific in one of the control runs where the virtual fish swims in a circular path.

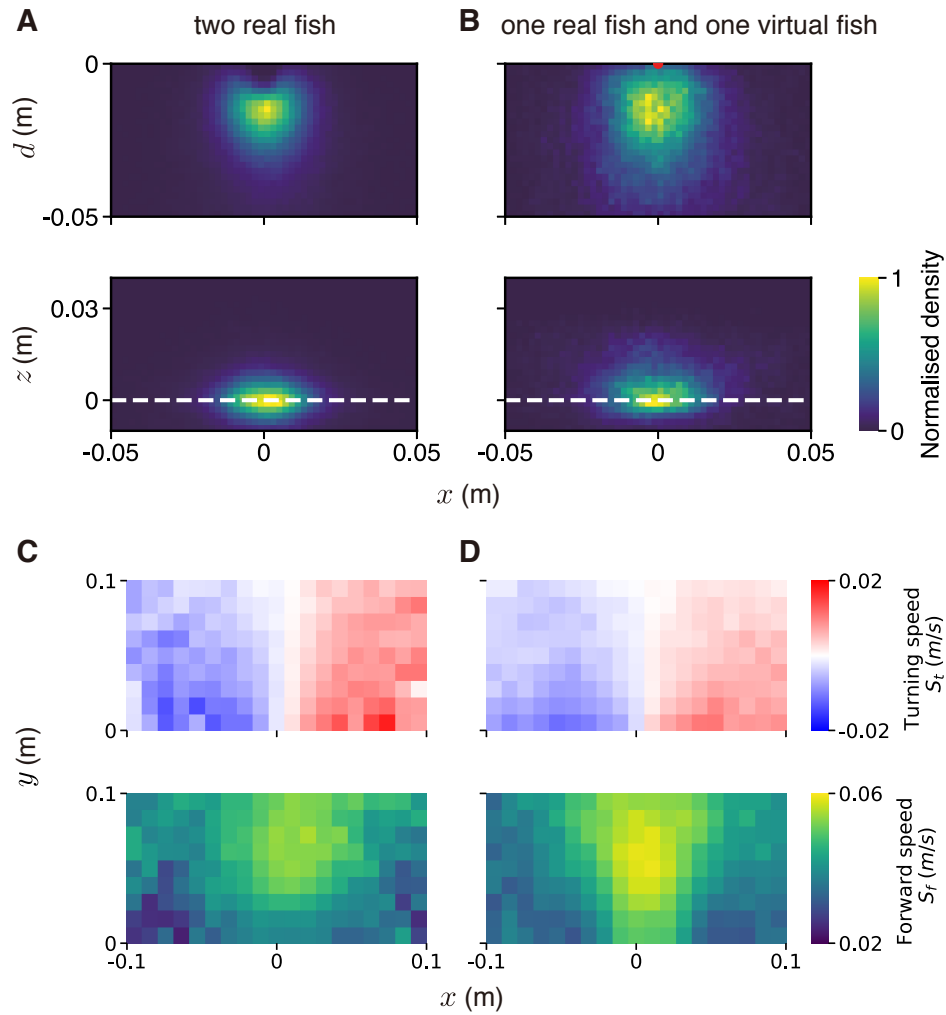

**Fig. S15.** Fish respond similarly to real and virtual conspecifics. Density plots from 3D tracking of pairs of fish within and without the VR. Both panels A and B represent the position of a follower in a coordinate system centered on the leader. The dashed line in B represents position of the leader on the  $z$ -plane. Panels C and D show the turning (left-right) and the forward (front-back) speeds of the follower in a coordinate system centered on the leader. (A and C) Two larval zebrafish fish swimming together. (B and D) A larval zebrafish swimming with a virtual conspecific.

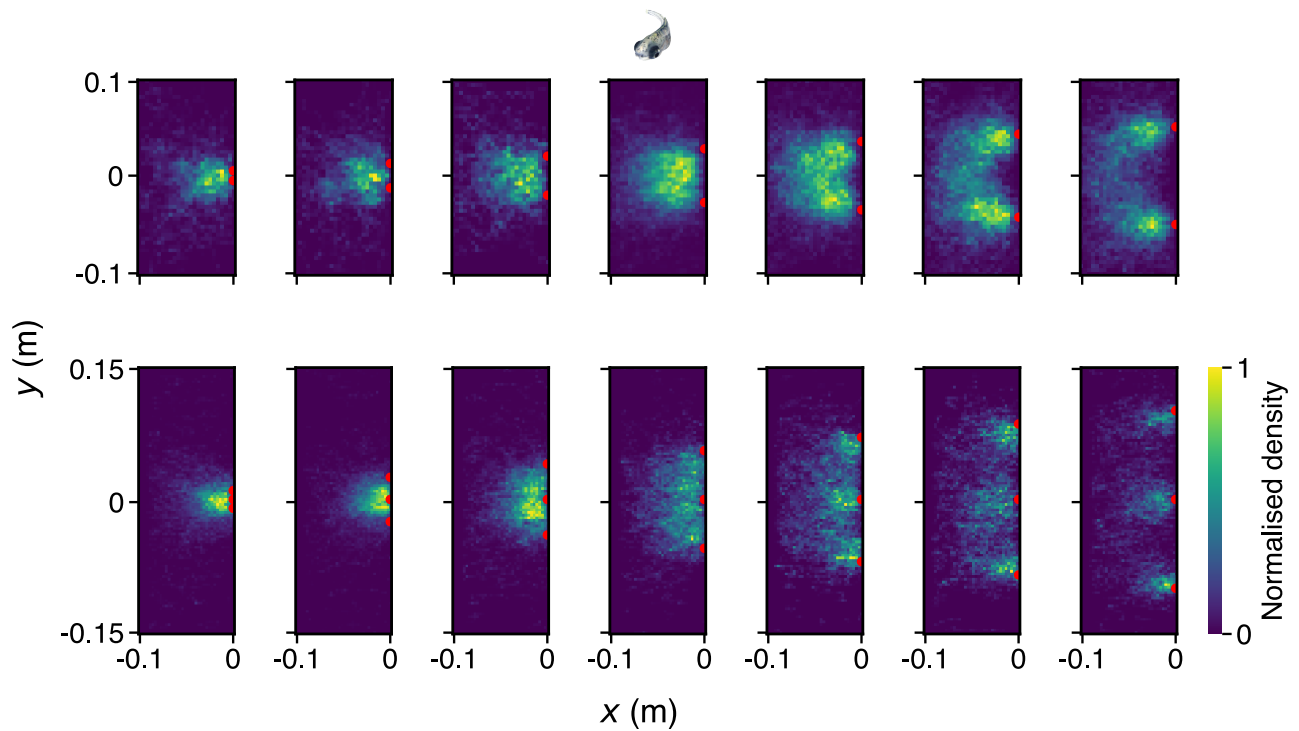

**Fig. S16.** Normalized density plots for larval zebrafish exposed to two or three virtual fish. The red dots represent positions of the virtual zebrafish that are presented to the real fish. Density plots represent position of the real fish as it follows these virtual fish. Top row presents positions of the real fish in presence of two virtual fish and the bottom row presents positions of the real fish in presence of three virtual fish.



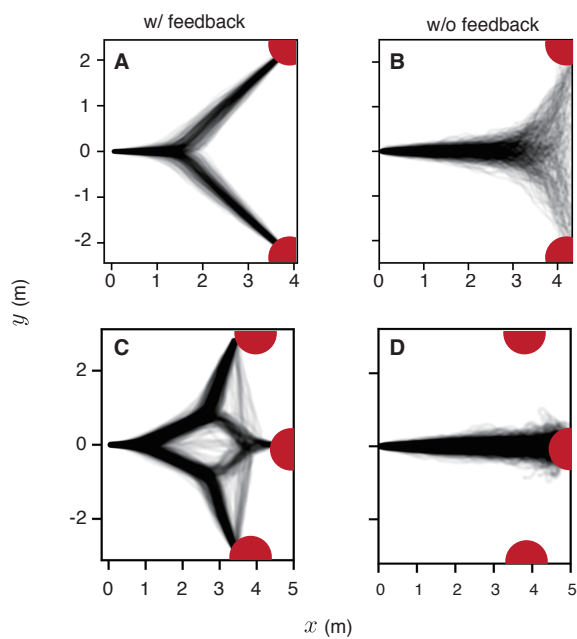

**Fig. S17.** Role of local excitation and long-range/global inhibition on producing the experimentally observed bifurcation patterns. Trajectories resulting from a decision-making model of animal collectives with (A and C) and without feedback (B and D) on individual preferences (500 replicates). A and B show trajectories for decision-making in the presence of two targets, while C and D show trajectories for decision-making in the presence of three targets. The axes represent  $x$ - and  $y$ -coordinates in Euclidean space. See Table S2 for parameters used in A and C. B and D were produced with identical parameters except  $\omega_{inc} = 0$  and  $\omega_{dec} = 0$ .

**Table S1. An overview of the parameter values explored for the neural decision-making model.**

| Parameter                                    | Symbol          | Value(s) |
|----------------------------------------------|-----------------|----------|
| System size (simulations)                    | $N$             | 60       |
| Neural tuning                                | $\nu$           | 0.5      |
| Directional noise (simulations)              | $\sigma_e$      | 0.02     |
| Neural noise / Temperature                   | $T$             | 0.2      |
| Lateral distance in cm (fish simulations)    | $L$             | 0–10     |
| Front-back distance in cm (fish simulations) | $d$             | 1.5–3    |
| Directional error (overlap implementation)   | $\sigma_\theta$ | 0.25     |

**Table S2. An overview of the parameter values explored for the neural decision-making model.**

| Parameter                     | Symbol         | Value(s) |
|-------------------------------|----------------|----------|
| Total agents                  | $N$            | 60       |
| Repulsion radius              | $r_r$          | 1        |
| Attraction / Alignment radius | $r_a$          | 6        |
| Turning rate                  | $\psi$         | 2        |
| Speed                         | $ v $          | 1        |
| Omega initialization          | $\omega_0$     | 0.3      |
| Omega increment               | $\omega_{inc}$ | 0.012    |
| Omega decrement               | $\omega_{dec}$ | 0.0008   |
| Maximum omega                 | $\omega_{max}$ | 0.4      |
| Timestep increment            | $\Delta t$     | 0.1      |

385 **References**

- 386 1. I Pinkoviezky, ID Couzin, NS Gov, Collective conflict resolution in groups on the move. *Phys. Rev. E* **97** (2018).  
387 2. A Sarel, A Finkelstein, L Las, N Ulanovsky, Vectorial representation of spatial goals in the hippocampus of bats. *Science*  
388 **355**, 176–180 (2017).  
389 3. A Bahl, F Engert, Neural circuits for evidence accumulation and decision making in larval zebrafish. *Nat. Neurosci.* **23**,  
390 94–102 (2020).  
391 4. SS Kim, H Rouault, S Druckmann, V Jayaraman, Ring attractor dynamics in the Drosophila central brain. *Science* **356**,  
392 849–853 (2017).  
393 5. JD Seelig, V Jayaraman, Neural dynamics for landmark orientation and angular path integration. *Nature* **521**, 186–191  
394 (2015).  
395 6. L Benedetti-Cecchi, L Tamburello, E Maggi, F Bulleri, Experimental perturbations modify the performance of early  
396 warning indicators of regime shift. *Curr. Biol.* **25**, 1867–1872 (2015).  
397 7. C Boettiger, A Hastings, From patterns to predictions. *Nature* **493**, 157–158 (2013).  
398 8. E Horn, R Wehner, The mechanism of visual pattern fixation in the walking fly, *Drosophila melanogaster*. *J. Comp.*  
399 *Physiol. A* **101**, 39–56 (1975).  
400 9. A Gelblum, et al., Ant groups optimally amplify the effect of transiently informed individuals. *Nat. Commun.* **6** (2015).  
401 10. RJ Glauber, Time-dependent statistics of the Ising model. *J. Math. Phys.* **4**, 294–307 (1963) Publisher: American Institute  
402 of Physics.  
403 11. RK Pathria, *Statistical Mechanics*. (Elsevier Science & Technology Books), (1972) Google-Books-ID: ejUVnQEACAAJ.  
404 12. D Biro, DJT Sumpter, J Meade, T Guilford, From compromise to leadership in pigeon homing. *Curr. Biol.* **16**, 2123–2128  
405 (2006).  
406 13. ID Couzin, et al., Democratic Consensus in Animal Groups. **334**, 4 (2011).  
407 14. A Strandburg-Peshkin, DR Farine, ID Couzin, MC Crofoot, Shared decision-making drives collective movement in wild  
408 baboons. *Science* **348**, 1358–1361 (2015).  
409 15. ID Couzin, J Krause, NR Franks, SA Levin, Effective leadership and decision-making in animal groups on the move.  
410 *Nature* **433**, 4 (2005).  
411 16. JR Stowers, et al., Virtual reality for freely moving animals. *Nat. Methods* **14**, 995–1002 (2017).  
412 17. U Kaupert, et al., Spatial cognition in a virtual reality home-cage extension for freely moving rodents. *J. Neurophysiol.*,  
413 1736–1748 (2017) Number: 4 Publisher: Ludwig-Maximilians-Universität München.  
414 18. H Sompolinsky, R Shapley, New perspectives on the mechanisms for orientation selectivity. *Curr. Opin. Neurobiol.* **7**,  
415 514–522 (1997).
